# Supplementary material for: Risk of adverse pregnancy outcomes associated with short and long birth intervals in Bangladesh: evidence from six Bangladesh Demographic and Health Surveys, 1996–2014
Source: PubMed Central journal article supplement — BMJ Open. 2019 Feb 22;9(2):e024392. doi: 10.1136/bmjopen-2018-024392 (PMC6398728; doi:10.1136/bmjopen-2018-024392), 2019-02-22
Supplement: bmjopen-2018-024392.draft_revisions.pdf [file bmjopen-2018-024392.draft_revisions.pdf]

# BMJ Open

BMJ Open is committed to open peer review. As part of this commitment we make the peer review history of every article we publish publicly available.

When an article is published we post the peer reviewers' comments and the authors' responses online. We also post the versions of the paper that were used during peer review. These are the versions that the peer review comments apply to.

The versions of the paper that follow are the versions that were submitted during the peer review process. They are not the versions of record or the final published versions. They should not be cited or distributed as the published version of this manuscript.

BMJ Open is an open access journal and the full, final, typeset and author-corrected version of record of the manuscript is available on our site with no access controls, subscription charges or pay-per-view fees (<http://bmjopen.bmj.com>).

If you have any questions on BMJ Open's open peer review process please email [editorial.bmjopen@bmj.com](mailto:editorial.bmjopen@bmj.com)

# BMJ Open

## Disparities in adverse pregnancy outcomes for short and long birth intervals in Bangladesh: evidence from six Bangladesh Demographic and Health Surveys, 1996-2014

|                               |                                                                                                                                                                                                                                                                                                                                                                      |
|-------------------------------|----------------------------------------------------------------------------------------------------------------------------------------------------------------------------------------------------------------------------------------------------------------------------------------------------------------------------------------------------------------------|
| Journal:                      | <i>BMJ Open</i>                                                                                                                                                                                                                                                                                                                                                      |
| Manuscript ID                 | bmjopen-2018-024392                                                                                                                                                                                                                                                                                                                                                  |
| Article Type:                 | Research                                                                                                                                                                                                                                                                                                                                                             |
| Date Submitted by the Author: | 25-May-2018                                                                                                                                                                                                                                                                                                                                                          |
| Complete List of Authors:     | Nisha, Monjura; The University of Sydney, Sydney School of Public Health<br>Alam, Ashraful; The University of Sydney, Sydney School of Public Health<br>Islam, Mohammad Tajul; Save the Children Bangladesh<br>Huda, Tanvir ; The University of Sydney, Sydney School of Public Health<br>Raynes-Greenow, Camille; The University of Sydney, School of Public Health |
| Keywords:                     | First-day neonatal death, Early neonatal death, Small birth size, Pregnancy outcome, Birth interval, Bangladesh                                                                                                                                                                                                                                                      |
|                               |                                                                                                                                                                                                                                                                                                                                                                      |

SCHOLARONE™  
Manuscripts

1  
2  
3 **1 Disparities in adverse pregnancy outcomes for short and long birth intervals in**  
4  
5 **2 Bangladesh: evidence from six Bangladesh Demographic and Health Surveys, 1996-**  
6  
7 **3 2014**  
8  
9

10 4 Monjura Khatun Nisha<sup>1</sup>

11  
12 \*Corresponding author

13  
14 E-mail: mnis2091@uni.sydney.edu.au

15  
16  
17 7 Ashraful Alam<sup>1</sup>

18  
19 Email: neeloy.alam@sydney.edu.au

20  
21 9 Mohammad Tajul Islam<sup>2</sup>

22  
23  
24 10 Email: abc.taj@gmail.com

25  
26 11 Tanvir Huda<sup>1</sup>

27  
28 Email: tanvir.huda@sydney.edu.au

29  
30  
31 13 Camille Raynes-Greenow<sup>1</sup>

32  
33 Email: camille.raynes-greenow@sydney.edu.au

34  
35 15

36  
37 16

38  
39 17 <sup>1</sup>The University of Sydney, Sydney School of Public Health, Edward ford building (A27),

40  
41  
42 18 NSW 2006, Australia

43  
44 19 <sup>2</sup>Save the Children, Dhaka, Bangladesh

45  
46 20

47  
48 21

49 22 Word count: 3997 words (excluding abstract, keywords, strengths and limitations of this  
50  
51 23 study, acknowledgement, author's contribution, conflict of interest, tables and figures)

52  
53 24

54  
55 25

## 26 **ABSTRACT**

### 27 **Objective**

28 To examine the effect of short (<36 months) and long ( $\geq 60$  months) birth intervals on adverse  
29 pregnancy outcomes in Bangladesh.

### 30 **Design, setting and participants**

31 We analysed data from six Bangladesh Demographic and Health Surveys (1996-1997, 1999-  
32 2000, 2004, 2007, 2011 and 2014). We included all singleton non-first live births, most  
33 recently born to the mothers within five years preceding each survey (n=21,382). We defined  
34 birth interval according to previous literature which suggests that between 36 and 59 months  
35 is the most ideal interval. Bivariate and multivariable analyses were conducted to obtain the  
36 crude and adjusted odds ratio (aOR) respectively to assess the odds of first-day neonatal  
37 death, early neonatal death and small birth size for both short (<36 months) and long ( $\geq 60$   
38 months) spacing between births.

### 39 **Main outcome measures**

40 First-day neonatal death, early neonatal death and small birth size.

### 41 **Results**

42 In the multivariable analysis, compared to births spaced 36-59 months, infants with birth  
43 intervals of less than 36 months were associated with the increased odds of first-day neonatal  
44 death (aOR: 2.11, 95% CI: 1.17, 3.78) and early neonatal death (aOR: 1.58, 95% CI: 1.13,  
45 2.22). Compared to births spaced 36-59 months, infants with birth interval of  $\geq 60$  months,  
46 were associated with the increased odds of first-day neonatal death (aOR: 2.02, 95% CI: 1.10,  
47 3.73) and small birth size (aOR: 1.17, 95% CI: 1.02, 1.34). When there was a history of  
48 pregnancy loss, there was an increase in the odds of first-day and early neonatal death for  
49 both short and long birth intervals, although there was no association.

## 50 **Conclusions**

51 Birth intervals shorter than 36 months and longer than 59 months are associated with the  
52 increased risk of adverse perinatal outcomes. Care-providers, program managers and  
53 policymakers should focus on promoting the optimal birth interval between 36-59 months in  
54 postpartum family planning.

55 **Key words:** Pregnancy outcome, birth interval, first-day neonatal death, early neonatal death,  
56 small birth size, Bangladesh

## 58 **Strengths and limitations of this study**

- 59 • The main strength of this study is the use of a large sample from six nationally  
60 representative surveys of Bangladesh with a very high response (98%).
- 61 • We used the information of the most recent births within the 5 years preceding the  
62 surveys in order to minimise recall bias.
- 63 • Our study is the first in Bangladesh which analysed the effect of birth intervals and  
64 other risk factors for first-day neonatal mortality.
- 65 • Demographic and Health Survey data is cross-sectional, which reduces the ability to  
66 infer causation.
- 67 • Demographic and Health Survey data uses maternal perceptions of infant birth size as  
68 a proxy for birthweight which may be a limitation.

## 70 BACKGROUND

71 Adverse pregnancy outcomes such as stillbirth, early neonatal mortality and low birthweight  
72 are of considerable public health significance. Globally, perinatal mortality (stillbirth and  
73 early neonatal mortality) accounts for more than 6 million deaths every year. Of those,  
74 approximately 2 million newborns die in the early neonatal period.<sup>1</sup> The risk is greatest on the  
75 first day of life, approximately 1 million newborns die within the first 24 hours.<sup>1</sup> Further, low  
76 birthweight, occurs in more than 20 million newborns worldwide, which is a major indicator  
77 of perinatal mortality and contributes to up to 80% of neonatal mortality.<sup>2</sup> The greatest  
78 proportion of perinatal deaths and low birthweight (97-99%) occur in Low and Middle-  
79 Income Countries (LMIC).<sup>3</sup>

80 Several interventions have been suggested to address adverse pregnancy outcomes, such as  
81 pregnancy spacing.<sup>4</sup> Both short and long birth intervals have been reported to be associated  
82 with an increased risk of a number of adverse perinatal outcomes.<sup>5 6</sup> Current World Health  
83 Organization (WHO) guidelines recommend an interval of at least 24 months before  
84 attempting the next pregnancy after a live birth (i.e. birth-to-pregnancy interval) in order to  
85 reduce any adverse pregnancy outcomes.<sup>7</sup> Thus, the birth-to-birth interval should be at least  
86 33 months by including nine months of pregnancy to the recommended 24 months.<sup>8</sup> In an  
87 analysis of Demographic and Health Survey data from 17 developing countries, Rutstein  
88 suggested that the optimal birth interval should be between 36 and 59 months as each birth  
89 interval less than 36 and more than 59 months showed a tendency towards neonatal mortality  
90 and morbidity.<sup>9</sup> The WHO highlighted the necessity of future research investigating the  
91 association between birth interval and adverse pregnancy outcomes.<sup>7</sup>

92 Bangladesh has high perinatal mortality (44 per 1000 pregnancies) and morbidity,<sup>10</sup> where  
93 birth spacing remains a problem.<sup>11</sup> Between the year 1993 and 2014, though the median birth

1  
2  
3 94 interval increased by 49% (from 35 months to 52 months), approximately 30% of non-first  
4  
5 95 births occurred within less than 36 months (7 months to 35 months) following the previous  
6  
7 96 birth.<sup>10</sup> However, another 40% of non-first births occurred following a birth interval of more  
8  
9 97 than 59 months.<sup>10</sup> Of the papers investigating birth interval in Bangladesh, most have  
10  
11 98 focussed on the effect of short birth interval and have not considered a long birth interval as a  
12  
13 99 risk of adverse perinatal outcome.<sup>12 13</sup> Given the changing demographics in Bangladesh and  
14  
15  
16 100 increase in proportion of longer birth intervals, our objective therefore was to examine  
17  
18 101 whether the preceding birth interval (short or long) was independently associated with  
19  
20 102 increased risk of adverse pregnancy outcomes including first-day neonatal mortality, early  
21  
22 103 neonatal mortality and low birthweight using pooled data from the Bangladesh Demographic  
23  
24 104 and Health Surveys.

## 105 **METHODS**

### 106 **Data source**

107 We used the Bangladesh Demographic and Health Survey (BDHS) data from the years;  
108 1996-1997, 1999-2000, 2004, 2007, 2011 and 2014. BDHS is a nationally representative  
109 household survey carried out every three to four years under the authority of the National  
110 Institute of Population Research and Training of the Ministry of Health and Family Welfare.  
111 The survey employed a two-stage stratified cluster-sampling design with rural and urban  
112 samples to collect information from ever-married women aged 15-49 years and ever-married  
113 men 15-54 years about demographic and health status. Data were obtained from the website;  
114 [www.measuredhs.com](http://www.measuredhs.com). The BDHS consists of three types of questionnaires: household,  
115 women, and men. Our analysis was limited to the information obtained from the women's  
116 and household questionnaires. We pooled the data files into a dataset and analysed the live  
117 births occurring during the five years preceding the surveys. In our analysis, we included the

1  
2  
3 118 data from all singleton, non-first, most recent live-born children within the five years  
4  
5 119 preceding the six BDHSs, 1996-1997, 1999-2000, 2004, 2007, 2011 and 2014.  
6  
7

### 8 120 **Outcome variables**

9  
10 121 We conducted three analyses, with three different outcome variables-‘first-day neonatal  
11  
12 122 death’, ‘early neonatal death’ and ‘small birth size’. First-day deaths were defined as deaths  
13  
14 123 during the first 24 hours after birth (day 0) among live-born children and early neonatal  
15  
16 124 deaths were deaths between the age of 0 to 6 days among live-born children. These two  
17  
18 125 outcome variables overlap, but conform to standard definitions. Estimates about birthweight  
19  
20 126 are not collected by the BDHS. ‘Mother’s perception of the baby’s birth size’ is routinely  
21  
22 127 used as a proxy indicator of birthweight. For our analysis, we defined low birthweight as  
23  
24 128 infants whose mother’s perception of size was either ‘very small’ or ‘smaller than average’.  
25  
26 129 Each of the outcome variables was considered dichotomous for this analysis as yes (1) or no  
27  
28 130 (0).  
29  
30  
31  
32

### 33 131 **Exposure variable**

34  
35 132 The main exposure variable used in our analysis was the length of the preceding birth interval  
36  
37 133 as a measure of birth spacing. This was measured as the number of months between two  
38  
39 134 successive live births.<sup>9 14</sup> We followed Rutstein’s recommendation regarding optimal birth  
40  
41 135 interval of 36-59 months for our analysis.<sup>9</sup> We categorised preceding birth interval in months  
42  
43 136 as short (<36 months) or long ( $\geq 60$  months) birth intervals for our analysis; where the birth  
44  
45 137 interval of 36–59 months was the reference category.  
46  
47  
48

### 49 138 **Covariates**

50  
51 139 Covariates included maternal age at childbirth (19 years or below, 20-34 years and 35 years  
52  
53 140 or more), maternal education (no education, primary and secondary or higher), birth order (2-  
54  
55 141 3,  $\geq 4$ ), maternal Body Mass Index (BMI) (underweight, average, overweight and obese), area  
56  
57  
58  
59  
60



1  
2  
3 142 of residence (urban and rural), wealth index (poorest quintile, second quintile, middle quintile  
4  
5 143 and richest quintile), maternal employment status during survey (not working and working),  
6  
7 144 desire for pregnancy (yes and no), ever use of contraception (yes and no), number of  
8  
9 145 Antenatal Care (ANC) visits (none, 1-3 visits and  $\geq 4$  visits), ANC by Skilled Birth  
10  
11 146 Attendants (SBA) (yes and no), history of any previous loss of pregnancy (yes and no), sex of  
12  
13 147 baby (female and male) and region (Dhaka, Barisal, Chittagong, Khulna, Rajshahi, Rangpur  
14  
15 148 and Sylhet).

16  
17  
18 149 We constructed the wealth index variable using principle component analysis through  
19  
20 150 ranking the available wealth variables in the pooled BDHS dataset such as housing materials,  
21  
22 151 type of toilet facility, source of drinking water, type of cooking fuel, availability of  
23  
24 152 electricity, ownership of assets (radio, television, fridge etc.), adjusted for urban-rural  
25  
26 153 differences. We constructed the 'ever use of contraception' variable from calendar data of  
27  
28 154 women's dataset for each year, where ever use of contraception was recorded if there was any  
29  
30 155 contraceptive practice at anytime.  
31  
32  
33

### 34 156 **Data analysis**

35  
36  
37 157 The 'first-day neonatal mortality' and 'early neonatal mortality' variables were calculated  
38  
39 158 from the birth history data, where age at death was recorded in days if they were less than 30  
40  
41 159 days old. 'Small birth size' was calculated from the birth history data, based on the  
42  
43 160 perceptions of mothers about their infant's birth size. Frequencies with weighted percentage  
44  
45 161 were calculated for the selected variables to describe the characteristics of the women who  
46  
47 162 had a 'first-day neonatal death', an 'early neonatal death' and a 'small birth size baby'. We  
48  
49 163 conducted bivariate analysis to ascertain the association between each of the independent  
50  
51 164 variables and each outcome separately, and multivariable analysis was performed to obtain  
52  
53 165 the adjusted odds ratio (aOR). The wald test was used to assess statistical significance with  
54  
55 166 95% confidential intervals (CI). The association was adjusted for potential confounders  
56  
57  
58  
59  
60

1  
2  
3 167 including maternal age at childbirth, birth order, maternal education, maternal wealth index,  
4  
5 168 maternal employment status, area of residence, maternal BMI, maternal desire of pregnancy,  
6  
7 169 ever use of contraceptive method, number of ANC visits, ANC by SBA, history of previous  
8  
9 170 pregnancy loss, sex of infant and region. We followed the direct life table approach to  
10  
11 171 calculate first-day and early neonatal mortality rates per 1000 live births. All analyses were  
12  
13 172 carried out using STATA version 14.2. The 'svy' command was used to calculate the  
14  
15 173 weighted values.  
16  
17  
18

19 174 We obtained permission from Monitoring and Evaluation to Assess and Use Results  
20  
21 175 Demographic and Health Surveys (MEASURE DHS) to download the data from the DHS  
22  
23 176 online archive. Ethics approval was not required for our analyses', as the data were  
24  
25 177 anonymous and publicly available.  
26  
27

### 28 178 **Patient involvement**

29  
30  
31 179 No patients were involved in this study.  
32  
33

### 34 180 **Figure 1: Flow diagram showing sample selection for first-day neonatal mortality, early** 35 36 181 **neonatal mortality and small birth size analysis**

## 37 38 39 182 **RESULTS**

40  
41 183 Over the six surveys, and approximately 18 years of data, a total of 42, 718 live births were  
42  
43 184 recorded who were born to the mothers aged 15-49 years within the five years preceding the  
44  
45 185 surveys with a high response (approximately 98%) (Figure 1). From the year 1996 to 2014,  
46  
47 186 there was a substantial decrease in the rate of overall early neonatal mortality (30.5 vs. 23.3  
48  
49 187 deaths per 1000 live births), but in terms of first-day neonatal mortality, we did not find any  
50  
51 188 consistent decrease, rather the rate has increased from 9.3 deaths in 1996 to 10.6 deaths in  
52  
53 189 2014 per 1000 live births (Figure 2). Rates of all three adverse pregnancy outcomes were  
54  
55  
56  
57  
58  
59  
60

1  
2  
3 190 highest among the first-born infants followed by the infants whose births were spaced less  
4  
5 191 than 36 months (Figure 3).

6  
7 192 There were 33, 973 singleton live-born infants, most recently born to the mothers within the  
8  
9 193 five years preceding each survey. Of those, 10,722 (32%) were first-born infants who were  
10  
11 194 ineligible as there was no birth interval, which left 21,382 non-first singleton live-born  
12  
13 195 infants in our final analysis for first-day and early neonatal mortality. For small birth size, our  
14  
15 196 analysis consisted of 11,022 singleton live-born children, for the years 1999-2000, 2011 and  
16  
17 197 2014, as the information regarding small birth size was not available for the surveys in 1996-  
18  
19 198 1997, 2004 and 2007.

20  
21  
22  
23 199 Of the 21,382 non-first singleton most recently live-born infants of six surveys, there were  
24  
25 200 115 first-day and 274 early neonatal deaths. Of 11,022 non-first singleton most recently live-  
26  
27 201 born infants of three surveys, there were 2002 infants with a birth size smaller than average.

28  
29  
30 202 **Figure 2: Trends in first-day and early neonatal mortality by year of survey (1996-2014)**

31  
32  
33 203 **Figure 3: First-day neonatal mortality, early neonatal mortality rates per 1000 live**  
34  
35 204 **births and the proportion of small birth size by preceding birth intervals**

36  
37  
38 205 **First-day neonatal mortality**

39  
40 206 Nearly half of the infants who died on the first-day (n=49) were born following a short birth  
41  
42 207 interval, another 44 infants who died on day '0' (36.0%) were born following a long birth  
43  
44 208 interval. Overall, mothers of the infants who died on the day '0' were more frequently aged  
45  
46 209 between 20 and 34 years (67.5%, n=82), did not have any formal education (36.4%, n=40),  
47  
48 210 had a parity 2-3 (63.3%, n=73), had an average BMI (59.2%, n=67), lived in a rural area  
49  
50 211 (79.2%, n=80) and the infant was male (64.1%, n=74) (Table 1).

51  
52  
53 212 **Early neonatal mortality**  
54  
55  
56  
57  
58  
59  
60

1  
2  
3 213 A large proportion of deaths in the early neonatal period was attributable to day '0' deaths  
4  
5 214 (42.8%, n=115). Approximately 45% of infants (n=122) who died within 7 days of birth were  
6  
7 215 born following a short birth interval. Also, a relatively higher proportion (29% vs. 26%) of  
8  
9 216 early neonatal deaths had a long birth interval compared to the recommended birth interval  
10  
11 217 (36-59 months). The socio-demographic characteristics of the mothers of the infants who  
12  
13 218 died in the early neonatal period was quite similar to the day '0' findings, and the proportion  
14  
15 219 of early neonatal mortality was highest among infants born to mothers aged 20-34 years  
16  
17 220 (71.5%, n=200), had a parity 2-3 (60.0%, n=163), did not have any formal education (42.0%,  
18  
19 221 n=116), lived in a rural area (81.0%, n=193), had an average BMI (58.4%, n=156), did not  
20  
21 222 have any ANC (55.2%, n=146) and the infant was male (58.0%, n=162) (Table 1).  
22  
23  
24

### 25 **Small birth size**

26  
27 224 More than one-third of infants with a small birth size (34.6%, n=698) were born with a short  
28  
29 225 birth interval. A similar proportion of infants with a small birth size (34.2%, n=694) were  
30  
31 226 born with a long birth interval. The highest proportion of infants perceived as small birth size  
32  
33 227 were born to the mothers aged 20-34 years (80.0%, n=1599), had a parity 2-3 (65.8%,  
34  
35 228 n=1322), had no formal education (38.3%, n=751), had an average BMI (54.4%, n=1069),  
36  
37 229 lived in rural area (79.9%, n=1445), did not have any ANC (51.4%, n=998) and the infant  
38  
39 230 was female (55.1%, n=1059) (Table 1).  
40  
41  
42

### 43 **Association of birth intervals with first-day neonatal mortality**

44  
45 232 In the multivariable analysis, both short and long birth intervals were associated with the  
46  
47 233 increased odds of first-day neonatal death. Compared to infants born following a birth  
48  
49 234 interval of 36-59 months, infants with a short birth interval were 2.11 times more likely to die  
50  
51 235 within 24 hours of life (95% CI: 1.17, 3.78). We also found that infants born after a long birth  
52  
53 236 interval, compared to those born following a birth interval of 36-59 months had a 2.02 times  
54  
55 237 higher odds of dying within 24 hours of life (95% CI: 1.10, 3.73). In terms of other  
56  
57  
58  
59

1  
2  
3 238 determinants, maternal age at childbirth of 19 years or less (aOR: 2.51, 95% CI: 1.35, 4.66),  
4  
5 239 maternal non-use of contraception (aOR: 2.20, 95% CI: 1.32, 3.68) and male infants (aOR:  
6  
7 240 1.70, 95% CI: 1.09, 2.64) were associated with the increased odds of first-day neonatal death  
8  
9 241 (Table 2).

#### 242 **Association of birth intervals with early neonatal mortality**

243 After adjustment for potential confounders, early neonatal mortality was associated with a  
244 short birth interval, while for long birth intervals there was no association. Compared to the  
245 infants with a birth interval of 36-59 months, infants born with a short birth interval had 1.58  
246 times higher odds of dying within 7 days of life (95% CI: 1.13, 2.22). Though the odds of  
247 early neonatal mortality after a long birth interval compared to the reference group were  
248 greater, there was no association (aOR: 1.23, 95% CI: 0.84, 1.81). Other determinants of  
249 early neonatal mortality included maternal age 19 years or less (aOR 1.53, 95% CI: 1.02,  
250 2.28), maternal non-use of contraception (aOR: 1.89, 95% CI: 1.35, 2.64) and being a male  
251 infant (aOR: 1.32, 95% CI: 1.01, 1.73) (Table 2).

#### 252 **Association of birth intervals with small birth size**

253 Long birth intervals appeared to be associated with the increased odds of small birth size  
254 compared to the reference birth interval (aOR: 1.17, 95% CI: 1.02, 1.34), while for short birth  
255 intervals, the odds of small birth size were smaller (aOR: 1.04, 95% CI: 0.89, 1.20) compared  
256 to the reference birth interval. Other factors associated with small birth size were mothers  
257 being classified as poorest (aOR: 1.30, 95% CI: 1.05, 1.61), second poorest (aOR: 1.34, 95%  
258 CI: 1.09, 1.64) on wealth index, mothers being underweight by BMI (aOR: 1.19, 95% CI:  
259 1.05, 1.34) and maternal non-use of contraception (aOR: 1.23, 95% CI: 1.06, 1.42). Unlike  
260 first-day and early neonatal mortality, male infants were less likely to be born small (aOR:  
261 0.71, 95% CI: 0.63, 0.80) compared to female infants (Table 2).

1  
2  
3 262 A history of pregnancy loss can be a determinant of birth interval and we therefore restricted  
4  
5 263 our analysis to the children whose mothers had a history of pregnancy loss for all three  
6  
7 264 outcomes. However, we found no relationship for either short or long birth intervals with all  
8  
9 265 three outcomes, though for both short and long birth intervals there was an increase in the  
10  
11 266 odds for first-day and early neonatal death (Table 3).

12  
13  
14 267

15  
16  
17  
18  
19  
20  
21  
22  
23  
24  
25  
26  
27  
28  
29  
30  
31  
32  
33  
34  
35  
36  
37  
38  
39  
40  
41  
42  
43  
44  
45  
46  
47  
48  
49  
50  
51  
52  
53  
54  
55  
56  
57  
58  
59  
60

For peer review only

1  
2  
3 268 **DISCUSSION**

4  
5 269 This is a large cross-sectional study of a large sample size over an 18-year time period. There  
6  
7 270 was a marked decline in the overall rate of early neonatal mortality between the year 1996  
8  
9 271 and 2014, whereas the rate of first-day neonatal death slightly increased. A major proportion  
10  
11 272 of infants who died on the first-day, or in the first week or with a small birth size were born  
12  
13 273 before the recommended optimal period of birth interval (36–59 months). We found that a  
14  
15 274 birth-to-birth interval shorter than 36 months was associated with an increased odds of  
16  
17 275 multiple adverse pregnancy outcomes including first-day neonatal mortality and early  
18  
19 276 neonatal mortality. Also, birth-to-birth interval longer than 59 months was associated with an  
20  
21 277 increased odds of first-day neonatal mortality and small birth size.  
22  
23  
24

25 278 Several studies have reported the association of a short birth interval with perinatal or  
26  
27 279 neonatal mortality.<sup>15 16</sup> However, to the best of our knowledge, no prior research has  
28  
29 280 examined the effect of birth interval on first-day neonatal mortality individually. We found  
30  
31 281 that a short birth-to-birth interval of less than 36 months was associated with higher odds of  
32  
33 282 first-day neonatal mortality. Further, we found that the odds of early neonatal mortality were  
34  
35 283 also greater among infants who were born following a short birth interval. This is consistent  
36  
37 284 with the findings of a few earlier investigations from LMIC's which examined the effect of  
38  
39 285 short birth intervals on perinatal, early neonatal or neonatal mortality.<sup>15 16</sup> Similar to our  
40  
41 286 findings, a previous study conducted in India reported an association of neonatal death with a  
42  
43 287 birth interval of less than 36 months (aOR: 1.78, 95% CI: 1.63, 1.94), compared to births  
44  
45 288 spaced 36–59 months.<sup>16</sup> Again, an analysis of 47 Demographic Health Surveys from LMIC  
46  
47 289 also supports our finding of higher odds of early neonatal mortality for short birth intervals,  
48  
49 290 though this analysis has used a slightly different definitions of both short (<24 months) and  
50  
51 291 the reference category birth interval (24-<60 months).<sup>17</sup> Also, our finding is in line with the  
52  
53 292 finding of a previous study conducted in Matlab, Bangladesh, where they reported an  
54  
55  
56  
57  
58  
59  
60

1  
2  
3 293 increased risk of very short birth intervals (less than 15 months) on early neonatal mortality  
4  
5 294 compared to those born after 36-59 months, though in their study the risk of early neonatal  
6  
7 295 mortality goes down as the birth interval increases up to a minimum of 24-59 months, which  
8  
9 296 is not consistent with our findings.<sup>12</sup> Furthermore, we did not find any significant association  
10  
11 297 between short birth interval and small birth size, although infants born following a short  
12  
13 298 interval were at increased odds of being born with a small birth size. In the BDHS,  
14  
15 299 birthweight is not routinely collected and birth size is based on maternal perception which  
16  
17 300 could lead to some errors in the estimation of small birth size and may be responsible for this  
18  
19 301 non-association. However, the direction of the effect is consistent with several earlier  
20  
21 302 investigations including a meta-analysis of 69 studies from both developing and developed  
22  
23 303 countries.<sup>4 15 18</sup> Several hypotheses have been proposed to explain the association of short  
24  
25 304 birth interval on adverse pregnancy outcomes.<sup>19</sup> One of the most frequently used hypotheses  
26  
27 305 is the maternal nutritional depletion phenomenon, which has been defined by Winkvist et al.  
28  
29 306 as a negative change in maternal nutritional status during a reproductive cycle, mostly due to  
30  
31 307 the biological competition between mother and the growing fetus.<sup>20-22</sup> Short birth spacing  
32  
33 308 does not allow mothers sufficient time to restore nutritional reserves needed to support fetal  
34  
35 309 growth and development during the subsequent pregnancy. This eventually causes maternal  
36  
37 310 nutritional depletion that leads to the increase risk of adverse pregnancy outcomes among the  
38  
39 311 births spaced after a short interval. Another explanation is that the association of short birth  
40  
41 312 intervals and adverse pregnancy outcomes could be confounded by other factors including  
42  
43 313 young maternal age, lower socio-economic status and lower utilisation of health services.<sup>23 24</sup>  
44  
45 314 In our analysis, after adjusting for maternal age, socio-economic factors, and maternal  
46  
47 315 characteristics as well as health service related factors, short birth interval remained  
48  
49 316 associated with first-day and early neonatal mortality which is in line with other studies from  
50  
51 317 both LMIC and high income countries which controlled for similar variables.<sup>12 14 25 26</sup>  
52  
53  
54  
55  
56  
57  
58  
59  
60



1  
2  
3 318 Our study further identified the association of long birth interval with adverse perinatal  
4  
5 319 outcomes and found that infants born after a long birth interval were associated with greater  
6  
7 320 odds of first-day neonatal mortality. The effect of long birth interval for early neonatal  
8  
9 321 mortality was also greater but was not significant. There are only a few published studies on  
10  
11 322 the effect of a long birth interval on adverse pregnancy outcome in LMIC and the results are  
12  
13 323 conflicting.<sup>4 15 16</sup> In contrast to our findings, a previous investigation conducted in India,  
14  
15 324 which examined the effect for long birth intervals for perinatal death, did not find any  
16  
17 325 association,<sup>15</sup> and a pooled analysis of 47 Demographic Health Surveys examined the effect  
18  
19 326 of longer interval for neonatal mortality and found that the odds were lower for the longer  
20  
21 327 preceding birth intervals ( $\geq 60$  months) (OR: 0.80, 95% CI: 0.67, 0.95) compared to the birth  
22  
23 328 interval of 24-<60 months.<sup>17</sup> The inconsistency in findings could be attributed to  
24  
25 329 methodological differences in both the reference category (36-59 months vs. 24-<60 months)  
26  
27 330 of the main exposure variable and the difference in the outcome variable (early neonatal  
28  
29 331 mortality vs. neonatal mortality). However, our findings are consistent with a meta-analysis  
30  
31 332 which reported higher odds of early neonatal mortality with a longer interval,<sup>4</sup> and Rutstein's  
32  
33 333 study which analysed data from 17 developing countries with the same finding.<sup>9</sup> Again, we  
34  
35 334 found that a long birth interval was associated with a greater odds of small birth size. This is  
36  
37 335 similar to a few prior studies which also reported the detrimental effect of a long birth  
38  
39 336 interval on birth size.<sup>4 15 27</sup> The increased odds of adverse pregnancy outcomes for long birth  
40  
41 337 intervals may be due to some concurrent factors such as advanced maternal age and previous  
42  
43 338 history of pregnancy loss. In an earlier investigation, Zhu et al. explained the association  
44  
45 339 between long birth intervals and adverse pregnancy outcomes through the gradual decline in  
46  
47 340 the maternal physiological and anatomical capacities of the reproductive system,  
48  
49 341 hypothesising that if a woman does not conceive for an extended time after a delivery, her  
50  
51 342 physiological characteristics may return to her primigravid state.<sup>28</sup>  
52  
53  
54  
55  
56  
57  
58  
59  
60

1  
2  
3 343 We also examined disparities in first-day neonatal mortality, early neonatal mortality and  
4  
5 344 small birth size by several other important factors. Consistent with several previous studies  
6  
7 345 from LMIC's including Bangladesh, we found that young maternal age, maternal non-use of  
8  
9 346 contraception and male sex of infant were associated with greater odds of first-day and early  
10  
11 347 neonatal mortality.<sup>29 30</sup> Regarding small birth size, the two poorest quintiles, maternal  
12  
13 348 underweight, maternal non-use of contraception and female sex of infant were determinants  
14  
15 349 of small birth size, similar to previous investigations.<sup>31 32</sup>

### 18 350 **Strengths and limitations**

20 351 The main strength of our study is that it was based on a large nationally representative sample  
21  
22 352 from six surveys within an 18-year time period in a single country which would improve the  
23  
24 353 homogeneity of the data. We restricted our analysis to the most recent live births within the  
25  
26 354 five years prior to the interview date to minimise recall bias. Furthermore, we were able to  
27  
28 355 add a number of potential confounding factors. We acknowledge some methodological  
29  
30 356 limitations. First, this is a cross-sectional data, which may limit the identification of a causal  
31  
32 357 relationship between the birth interval and adverse pregnancy outcomes. Secondly, BDHS  
33  
34 358 data relies on maternal recall and report of the information regarding preceding birth intervals  
35  
36 359 and the days of infant deaths, which is subject to recall bias. There is a possibility of  
37  
38 360 underreporting of infant deaths, as birth histories and infant survival information were only  
39  
40 361 collected from surviving mothers and there is a strong association between maternal and  
41  
42 362 infant deaths. Also, in our analysis, we were unable to include the variable regarding the  
43  
44 363 history of immediate previous adverse outcome such as stillbirth, miscarriage etc. which is a  
45  
46 364 major determinant of adverse perinatal outcomes in the subsequent pregnancy. Also, previous  
47  
48 365 adverse pregnancy outcome has an influence on birth interval; as mothers who had a previous  
49  
50 366 pregnancy loss may rush into a pregnancy without properly recovering from the pregnancy  
51  
52 367 loss. A previous investigation conducted in Bangladesh, reported that a short birth interval  
53  
54  
55  
56  
57  
58  
59  
60

1  
2  
3 368 increases the risk of neonatal death of the subsequent infant after a previous adverse neonatal  
4  
5 369 death.<sup>33</sup> We were able to include the variable ‘ever had a pregnancy loss’ in our analysis, but  
6  
7 370 none of our outcome variables was significant, though stratifying by that variable increased  
8  
9 371 the effect sizes of first-day and early neonatal mortality for both short and long birth  
10  
11 372 intervals.

### 14 373 **CONCLUSIONS**

16 374 Our analysis supports the reduced risk of adverse pregnancy outcomes following a birth-to-  
17  
18 375 birth interval of 36-59 months which is consistent with the WHO recommendation of a birth-  
19  
20 376 to-pregnancy interval of 24 months. Our results highlight several important implications for  
21  
22 377 care-providers, program managers and policymakers by suggesting that a preceding birth  
23  
24 378 interval of 36-59 months could prevent adverse pregnancy outcomes including first-day  
25  
26 379 neonatal death, early neonatal death and low birthweight. Promoting an optimal birth interval  
27  
28 380 of 36-59 months in postpartum family planning is needed.

### 33 381 **Acknowledgement**

35 382 This paper is a part of MKN’s PhD thesis. We are grateful to Sydney Medical School, The  
36  
37 383 University of Sydney for funding MKN’s PhD (Early Career Researcher Postgraduate  
38  
39 384 Scholarship). We would like to thank MEASURE DHS and NIPORT for permitting us to  
40  
41 385 analyse the BDHS 1996-2014 datasets. CRG is funded by the National Health and Medical  
42  
43 386 Research Council Career Development Award #1087062.

### 47 387 **Authors’ contributions**

49 388 MKN, CRG and AA conceptualised and designed the study. MKN performed the literature  
50  
51 389 review. MKN, CRG, MTI and TH performed statistical analysis. MKN and CRG drafted the  
52  
53 390 manuscript. MKN and CRG contributed to the interpretation of the data. CRG, AA and MTI

1  
2  
3 391 contributed to the critical revision of the manuscript. All the authors read and approved the  
4  
5 392 final manuscript.

6  
7 393

8  
9 394 **Conflict of interest**

10  
11 395 We declare that we have no conflict of interest.

12  
13 396

14  
15  
16 397

17  
18  
19  
20  
21  
22  
23  
24  
25  
26  
27  
28  
29  
30  
31  
32  
33  
34  
35  
36  
37  
38  
39  
40  
41  
42  
43  
44  
45  
46  
47  
48  
49  
50  
51  
52  
53  
54  
55  
56  
57  
58  
59  
60

For peer review only

## 398 REFERENCES

- 399 1. World Health Organization. Newborns: reducing mortality 2017 [Available from:  
400 <http://www.who.int/mediacentre/factsheets/fs333/en/> accessed 17 November 2017.
- 401 2. KUO C-P, LEE S-H, WU W-Y, et al. Low Birth Weight: Country, Regional and Global  
402 Estimates Low Birth Weight: Country, Regional and Global Estimates, 2004.
- 403 3. Organization WH. Care of the preterm and low-birth-weight newborn 2017 [Available  
404 from: [http://www.who.int/maternal\\_child\\_adolescent/newborns/prematurity/en/](http://www.who.int/maternal_child_adolescent/newborns/prematurity/en/) accessed 12  
405 December 2017.
- 406 4. Conde-Agudelo A, Rosas-Bermúdez A, Kafury-Goeta A. Birth spacing and risk of adverse  
407 perinatal outcomes: A meta-analysis. *JAMA* 2006;295(15):1809-23. doi:  
408 10.1001/jama.295.15.1809
- 409 5. Ekin A, Gezer C, Taner CE, et al. Impact of interpregnancy interval on the subsequent risk  
410 of adverse perinatal outcomes. *The journal of obstetrics and gynaecology research*  
411 2015;41(11):1744-51. doi: 10.1111/jog.12783 [published Online First: 2015/07/18]
- 412 6. Qin C, Mi C, Xia A, et al. A first look at the effects of long inter-pregnancy interval and  
413 advanced maternal age on perinatal outcomes: A retrospective cohort study. *Birth*  
414 2017;44(3):230-37. doi: 10.1111/birt.12289
- 415 7. World Health Organization. Report of a WHO Technical Consultation on Birth Spacing,  
416 2005.
- 417 8. Exavery A, Mrema S, Shamte A, et al. Levels and correlates of non-adherence to WHO  
418 recommended inter-birth intervals in Rufiji, Tanzania. *BMC Pregnancy and Childbirth*  
419 2012;12(1):152. doi: 10.1186/1471-2393-12-152
- 420 9. Rutstein SO. Effects of preceding birth intervals on neonatal, infant and under-five years  
421 mortality and nutritional status in developing countries: evidence from the demographic and  
422 health surveys. *International Journal of Gynecology & Obstetrics* 2005;89:S7-S24. doi:  
423 10.1016/j.ijgo.2004.11.012
- 424 10. National Institute of Population Research and Training (NIPORT) MaA, and ICF  
425 International. Bangladesh Demographic and Health Survey 2014. Dhaka, Bangladesh, and  
426 Rockville, Maryland, USA: NIPORT, Mitra and Associates, and ICF International, 2016.
- 427 11. Khan JR, Bari W, Latif AHMM. Trend of determinants of birth interval dynamics in  
428 Bangladesh. *BMC Public Health* 2016;16(1):934. doi: 10.1186/s12889-016-3577-9
- 429 12. Davanzo J, Hale L, Razzaque A, et al. The effects of pregnancy spacing on infant and  
430 child mortality in Matlab, Bangladesh: How they vary by the type of pregnancy outcome that  
431 began the interval. *Population Studies* 2008;62(2):131-54. doi: 10.1080/00324720802022089
- 432 13. de Jonge HC, Azad K, Seward N, et al. Determinants and consequences of short birth  
433 interval in rural Bangladesh: a cross-sectional study. *BMC Pregnancy and Childbirth*  
434 2014;14(1):427. doi: 10.1186/s12884-014-0427-6
- 435 14. Rutstein SO. Further evidence of the effects of preceding birth intervals on neonatal,  
436 infant, and under-five-years mortality and nutritional status in developing countries: Evidence  
437 from the demographic and health surveys. DHS Working Papers No 41. Calverton, Maryland,  
438 USA: Macro International, 2008.
- 439 15. Mahande MJ, Obure J. Effect of interpregnancy interval on adverse pregnancy outcomes  
440 in northern Tanzania: a registry-based retrospective cohort study. *BMC Pregnancy and*  
441 *Childbirth* 2016;16:140. doi: 10.1186/s12884-016-0929-5
- 442 16. Williams EK, Hossain MB, Sharma RK, et al. Birth Interval and Risk of Stillbirth or  
443 Neonatal Death: Findings from Rural North India. *Journal of Tropical Pediatrics*  
444 2008;54(5):321-27. doi: 10.1093/tropej/fmn027

- 1  
2  
3 445 17. Kozuki N, Walker N. Exploring the association between short/long preceding birth  
4 446 intervals and child mortality: using reference birth interval children of the same mother as  
5 447 comparison. *BMC Public Health* 2013;13(Suppl 3):S6-S6. doi: 10.1186/1471-2458-13-S3-S6  
6 448 18. Appareddy S, Pryor J, Bailey B. Inter-pregnancy interval and adverse outcomes:  
7 449 Evidence for an additional risk in health disparate populations. *The Journal of Maternal-*  
8 450 *Fetal & Neonatal Medicine* 2017;30(21):2640-44. doi: 10.1080/14767058.2016.1260115  
9 451 19. Miller JE. Birth intervals and perinatal health: an investigation of three hypotheses. *Fam*  
10 452 *Plann Perspect* 1991;23(2):62-70. [published Online First: 1991/03/01]  
11 453 20. Winkvist A, Rasmussen KM, Habicht JP. A new definition of maternal depletion  
12 454 syndrome. *Am J Public Health* 1992;82(5):691-4. [published Online First: 1992/05/01]  
13 455 21. King JC. The risk of maternal nutritional depletion and poor outcomes increases in early  
14 456 or closely spaced pregnancies. *The Journal of nutrition* 2003;133(5 Suppl 2):1732s-36s.  
15 457 [published Online First: 2003/05/06]  
16 458 22. Smits LJ, Essed GG. Short interpregnancy intervals and unfavourable pregnancy  
17 459 outcome: role of folate depletion. *Lancet* 2001;358(9298):2074-7. doi: 10.1016/s0140-  
18 460 6736(01)07105-7 [published Online First: 2002/01/05]  
19 461 23. Klebanoff MA. The interval between pregnancies and the outcome of subsequent births.  
20 462 *The New England journal of medicine* 1999;340(8):643-4. doi:  
21 463 10.1056/nejm199902253400809 [published Online First: 1999/02/25]  
22 464 24. Wendt A, Gibbs Cassandra M, Peters S, et al. Impact of Increasing Inter-pregnancy  
23 465 Interval on Maternal and Infant Health. *Paediatric and Perinatal Epidemiology*  
24 466 2012;26(s1):239-58. doi: 10.1111/j.1365-3016.2012.01285.x  
25 467 25. Conde-Agudelo A, Belizán JM, Norton MH, et al. Effect of the interpregnancy interval  
26 468 on perinatal outcomes in Latin America. *Obstetrics & Gynecology* 2005;106(2):359-66.  
27 469 26. Stamilio DM, DeFranco E, Paré E, et al. Short interpregnancy interval: risk of uterine  
28 470 rupture and complications of vaginal birth after cesarean delivery. *Obstetrics & Gynecology*  
29 471 2007;110(5):1075-82.  
30 472 27. Zhu BP. Effect of interpregnancy interval on birth outcomes: findings from three recent  
31 473 US studies. *International Journal of Gynecology & Obstetrics* 2005;89:S25-S33. doi:  
32 474 10.1016/j.ijgo.2004.08.002  
33 475 28. Zhu BP, Rolfs RT, Nangle BE, et al. Effect of the interval between pregnancies on  
34 476 perinatal outcomes. *The New England journal of medicine* 1999;340(8):589-94. doi:  
35 477 10.1056/nejm199902253400801 [published Online First: 1999/02/25]  
36 478 29. Ezeh OK. Trends and population-attributable risk estimates for predictors of early  
37 479 neonatal mortality in Nigeria, 2003–2013: a cross-sectional analysis. *BMJ Open* 2017;7(5)  
38 480 doi: 10.1136/bmjopen-2016-013350  
39 481 30. Abir T, Agho KE, Page AN, et al. Risk factors for under-5 mortality: evidence from  
40 482 Bangladesh Demographic and Health Survey, 2004–2011. *BMJ Open* 2015;5(8) doi:  
41 483 10.1136/bmjopen-2014-006722  
42 484 31. Karim MR, Mondal MNI, Rana MM, et al. Maternal Factors are Important Predictors of  
43 485 Low Birth Weight: Evidence from Bangladesh Demographic & Health Survey-2011.  
44 486 *Malaysian Journal of Nutrition* 2016;22(2):257-65.  
45 487 32. Nisar YB, Dibley MJ. Antenatal iron–folic acid supplementation reduces risk of low  
46 488 birthweight in Pakistan: secondary analysis of Demographic and Health Survey 2006–2007.  
47 489 *Maternal & Child Nutrition* 2016;12(1):85-98. doi: 10.1111/mcn.12156  
48 490 33. Saha UR, van Soest A. Infant death clustering in families: Magnitude, causes, and the  
49 491 influence of better health services, Bangladesh 1982–2005. *Population Studies*  
50 492 2011;65(3):273-87. doi: 10.1080/00324728.2011.602100

493



Table 1: First-day neonatal mortality, early neonatal mortality and small birth size infants by maternal characteristics in Bangladesh: BDHS 1996-2014

| Predictors                                | First-day neonatal mortality<br>(N= 21,382)<br>n (%)<br>n=115 | Early neonatal mortality<br>(N= 21,382)<br>n (%)<br>n=274 | Small birth size<br>(N= 11,022)<br>n (%)<br>n=2,002 |
|-------------------------------------------|---------------------------------------------------------------|-----------------------------------------------------------|-----------------------------------------------------|
| <b>Preceding birth interval in months</b> |                                                               |                                                           |                                                     |
| <36 months                                | 49 (45.2)                                                     | 122 (45.2)                                                | 698 (34.6)                                          |
| 36-59 months                              | 22 (18.8)                                                     | 70 (26.2)                                                 | 610 (31.2)                                          |
| ≥ 60 months                               | 44 (36.0)                                                     | 82 (28.6)                                                 | 694 (34.2)                                          |
| <b>Mother's age at childbirth</b>         |                                                               |                                                           |                                                     |
| ≤19 years                                 | 20 (21.1)                                                     | 40 (16.2)                                                 | 218 (10.7)                                          |
| 20-34 years                               | 82 (67.5)                                                     | 200 (71.5)                                                | 1599 (80.0)                                         |
| ≥35 years                                 | 13 (11.4)                                                     | 34 (12.3)                                                 | 185 (9.3)                                           |
| <b>Birth order</b>                        |                                                               |                                                           |                                                     |
| 2-3                                       | 73 (63.3)                                                     | 163 (60.0)                                                | 1322 (65.8)                                         |
| ≥4                                        | 42 (36.7)                                                     | 111 (40.0)                                                | 680 (34.2)                                          |
| <b>Maternal education</b>                 |                                                               |                                                           |                                                     |
| None                                      | 40 (36.4)                                                     | 116 (42.0)                                                | 751 (38.3)                                          |
| Primary                                   | 41 (33.7)                                                     | 84 (30.6)                                                 | 618 (29.0)                                          |
| Secondary or higher                       | 34 (29.9)                                                     | 74 (27.4)                                                 | 633 (32.7)                                          |
| <b>Wealth index</b>                       |                                                               |                                                           |                                                     |
| Poorest quintile                          | 24 (19.6)                                                     | 71 (23.5)                                                 | 428 (19.6)                                          |
| Second quintile                           | 24 (21.6)                                                     | 63 (24.0)                                                 | 394 (19.8)                                          |
| Middle quintile                           | 24 (19.5)                                                     | 57 (22.2)                                                 | 389 (19.4)                                          |
| Fourth quintile                           | 20 (20.2)                                                     | 35 (13.5)                                                 | 388 (20.7)                                          |
| Richest quintile                          | 23 (19.1)                                                     | 48 (16.8)                                                 | 403 (20.5)                                          |
| <b>Employment status</b>                  |                                                               |                                                           |                                                     |
| Currently working                         | 34 (32.1)                                                     | 70 (28.0)                                                 | 339 (18.0)                                          |
| Not working                               | 81 (67.9)                                                     | 204 (72.0)                                                | 1663 (82.0)                                         |
| <b>Area of residence</b>                  |                                                               |                                                           |                                                     |
| Urban                                     | 35 (20.8)                                                     | 81 (19.0)                                                 | 557 (20.1)                                          |
| Rural                                     | 80 (79.2)                                                     | 193 (81.0)                                                | 1445 (79.9)                                         |
| <b>Maternal BMI</b>                       |                                                               |                                                           |                                                     |
| Underweight                               | 27 (23.1)                                                     | 83 (29.3)                                                 | 711 (35.3)                                          |
| Average                                   | 67 (59.2)                                                     | 156 (58.4)                                                | 1069 (54.5)                                         |
| Overweight                                | 16 (13.1)                                                     | 26 (9.3)                                                  | 169 (7.9)                                           |
| Obese                                     | 5 (4.6)                                                       | 9 (3.0)                                                   | 53 (2.3)                                            |
| <b>Maternal desire of</b>                 |                                                               |                                                           |                                                     |

|                                        |           |            |             |
|----------------------------------------|-----------|------------|-------------|
| pregnancy                              |           |            |             |
| Yes                                    | 77 (63.3) | 171 (63.5) | 1205 (60.1) |
| No                                     | 38 (36.7) | 103 (36.5) | 797 (39.9)  |
| Ever use of contraception              |           |            |             |
| Yes                                    | 81 (72.9) | 196 (71.9) | 1605 (81.1) |
| No                                     | 34 (27.1) | 78 (28.1)  | 397 (18.9)  |
| No. of ANC visits                      |           |            |             |
| None                                   | 48 (43.1) | 146 (55.2) | 998 (51.4)  |
| 1-3 visits                             | 46 (40.7) | 90 (32.0)  | 683 (33.7)  |
| ≥4 visits                              | 21 (16.2) | 38 (12.8)  | 321 (14.9)  |
| ANC by SBA                             |           |            |             |
| Yes                                    | 56 (47.3) | 111 (38.6) | 817 (38.8)  |
| No                                     | 59 (52.7) | 163 (61.4) | 1185 (61.2) |
| History of any previous pregnancy loss |           |            |             |
| Yes                                    | 35 (26.3) | 79 (26.2)  | 435 (21.4)  |
| No                                     | 80 (73.7) | 195 (73.8) | 1567 (78.6) |
| Sex of infant                          |           |            |             |
| Male                                   | 74 (64.1) | 162 (58.0) | 943 (44.9)  |
| Female                                 | 41 (35.9) | 112 (42.0) | 1059 (55.1) |
| Region                                 |           |            |             |
| Barisal                                | 10 (4.2)  | 28 (5.5)   | 176 (4.7)   |
| Chittagong                             | 12 (10.1) | 40 (13.9)  | 463 (25.4)  |
| Khulna                                 | 10 (8.2)  | 27 (9.0)   | 232 (8.6)   |
| Rajshahi                               | 27 (25.1) | 50 (20.9)  | 227 (13.2)  |
| Rangpur                                | 15 (8.0)  | 47 (10.7)  | 235 (8.2)   |
| Sylhet                                 | 10 (3.5)  | 18 (3.5)   | 281 (7.1)   |
| Dhaka                                  | 31 (40.9) | 64 (36.5)  | 388 (32.8)  |
| Year of survey                         |           |            |             |
| 1996                                   | 16 (14.0) | 45 (15.8)  | -           |
| 1999                                   | 13 (10.7) | 45 (15.8)  | 705 (34.2)  |
| 2004                                   | 22 (20.1) | 55 (21.2)  | -           |
| 2007                                   | 19 (17.9) | 37 (13.6)  | -           |
| 2011                                   | 29 (24.1) | 59 (21.5)  | 813 (40.1)  |
| 2014                                   | 16 (13.2) | 33 (12.1)  | 484 (25.7)  |



Table 2: Adjusted odds ratios for the association between preceding birth intervals and adverse pregnancy outcomes in Bangladesh: BDHS 1996-2014

| Predictors                                | First-day neonatal mortality<br>N=21,382 |         | Early neonatal mortality<br>N=21,382 |         | Small birth size<br>N=11,022 |         |
|-------------------------------------------|------------------------------------------|---------|--------------------------------------|---------|------------------------------|---------|
|                                           | aOR (95% CI)                             | P value | aOR (95% CI)                         | P value | aOR (95% CI)                 | P value |
| <b>Preceding birth interval in months</b> |                                          |         |                                      |         |                              |         |
| <36 months                                | 2.11 (1.17, 3.78)                        | <0.05   | 1.58 (1.13, 2.22)                    | <0.05   | 1.04 (0.90, 1.20)            | 0.08    |
| 36-59 months                              | Reference                                |         | Reference                            |         | Reference                    |         |
| ≥60 months                                | 2.02 (1.10, 3.73)                        |         | 1.23 (0.84, 1.81)                    |         | 1.17 (1.02, 1.34)            |         |
| <b>Mother's age at childbirth</b>         |                                          |         |                                      |         |                              |         |
| ≤19 years                                 | 2.51 (1.35, 4.66)                        | <0.05   | 1.53 (1.02, 2.28)                    | <0.05   | 1.01 (0.83, 1.21)            | 0.68    |
| 20-34 years                               | Reference                                |         | Reference                            |         | Reference                    |         |
| ≥35 years                                 | 1.34 (0.67, 2.69)                        |         | 1.46 (0.93, 2.29)                    |         | 1.10 (0.89, 1.36)            |         |
| <b>Birth order</b>                        |                                          |         |                                      |         |                              |         |
| 2-3                                       | Reference                                |         | Reference                            |         | Reference                    |         |
| ≥4                                        | 1.48 (0.88, 2.50)                        | 0.14    | 1.27 (0.92, 1.75)                    | 0.15    | 1.02 (0.89, 1.16)            | 0.81    |
| <b>Maternal education</b>                 |                                          |         |                                      |         |                              |         |
| None                                      | 0.97 (0.49, 1.94)                        | 0.80    | 0.94 (0.60, 1.46)                    | 0.94    | 1.09 (0.91, 1.30)            | 0.05    |
| Primary                                   | 1.15 (0.62, 2.11)                        |         | 0.98 (0.65, 1.50)                    |         | 0.91 (0.77, 1.07)            |         |
| Secondary or higher                       | Reference                                |         | Reference                            |         | Reference                    |         |
| <b>Wealth status</b>                      |                                          |         |                                      |         |                              |         |
| Poorest quintile                          | 0.76 (0.34, 1.68)                        | 0.89    | 0.86 (0.53, 1.40)                    | 0.68    | 1.30 (1.05, 1.61)            | <0.05   |
| Second quintile                           | 0.92 (0.43, 1.95)                        |         | 0.99 (0.61, 1.63)                    |         | 1.34 (1.09, 1.64)            |         |
| Middle quintile                           | 0.97 (0.48, 1.96)                        |         | 1.09 (0.70, 1.72)                    |         | 1.12 (0.91, 1.37)            |         |
| Fourth quintile                           | 1.15 (0.58, 2.28)                        |         | 0.80 (0.48, 1.32)                    |         | 1.12 (0.93, 1.37)            |         |

|                              |                   |       |                   |        |                   |       |
|------------------------------|-------------------|-------|-------------------|--------|-------------------|-------|
| Richest quintile             | Reference         |       | Reference         |        | Reference         |       |
| Employment status            |                   |       |                   |        |                   |       |
| Working                      | 1.59 (0.99, 2.56) | 0.05  | 1.30 (0.96, 1.75) | 0.09   | 1.02 (0.87, 1.19) | 0.83  |
| Not working                  | Reference         |       | Reference         |        | Reference         |       |
| Area of residence            |                   |       |                   |        |                   |       |
| Urban                        | 1.10 (0.64, 1.88) | 0.72  | 1.14 (0.80, 1.63) | 0.46   | 1.09 (0.93, 1.27) | 0.28  |
| Rural                        | Reference         |       | Reference         |        | Reference         |       |
| Maternal BMI                 |                   |       |                   |        |                   |       |
| Underweight                  | 0.58 (0.35, 0.97) | <0.05 | 0.70 (0.52, 0.94) | 0.05   | 1.19 (1.05, 1.34) | <0.05 |
| Average                      | Reference         |       | Reference         |        | Reference         |       |
| Overweight                   | 1.81 (0.90, 3.65) |       | 1.36 (0.80, 2.32) |        | 0.86 (0.70, 1.07) |       |
| Obese                        | 1.84 (0.59, 5.67) |       | 1.23 (0.53, 2.89) |        | 0.86 (0.60, 1.23) |       |
| Maternal desire of pregnancy |                   |       |                   |        |                   |       |
| Yes                          | 1.09 (0.71, 1.68) | 0.68  | 1.13 (0.84, 1.51) | 0.43   | 0.92 (0.81, 1.05) | 0.22  |
| No                           | Reference         |       | Reference         |        | Reference         |       |
| Ever use of contraception    |                   |       |                   |        |                   |       |
| Yes                          | Reference         |       | Reference         |        | Reference         |       |
| No                           | 2.20 (1.32, 3.68) | <0.05 | 1.89 (1.35, 2.64) | <0.001 | 1.23 (1.06, 1.42) | <0.05 |
| No of ANC visits             |                   |       |                   |        |                   |       |
| None                         | 0.89 (0.29, 2.73) | 0.62  | 1.61 (0.74, 3.48) | 0.48   | 1.09 (0.84, 1.42) | 0.79  |
| 1-3 visits                   | 1.21 (0.61, 2.37) |       | 1.16 (0.71, 1.89) |        | 1.03 (0.86, 1.23) |       |
| ≥4 visits                    | Reference         |       | Reference         |        | Reference         |       |
| ANC by SBA                   |                   |       |                   |        |                   |       |
| Yes                          | Reference         |       | Reference         |        | Reference         |       |

1  
2  
3  
4  
5  
6  
7  
8  
9  
10  
11  
12  
13  
14  
15  
16  
17  
18  
19  
20  
21  
22  
23  
24  
25  
26  
27  
28  
29  
30  
31  
32  
33  
34  
35  
36  
37  
38  
39  
40  
41  
42  
43  
44  
45  
46  
47

|                                        |                   |       |                   |       |                   |        |
|----------------------------------------|-------------------|-------|-------------------|-------|-------------------|--------|
| No                                     | 1.01 (0.46, 2.19) | 0.99  | 0.78 (0.43, 1.42) | 0.42  | 1.05 (0.83, 1.32) | 0.70   |
| History of any previous pregnancy loss |                   |       |                   |       |                   |        |
| Yes                                    | 1.31 (0.85, 2.03) | 0.22  | 1.27 (0.94, 1.71) | 0.12  | 1.04 (0.91, 1.20) | 0.53   |
| No                                     | Reference         |       | Reference         |       | Reference         |        |
| Sex of infant                          |                   |       |                   |       |                   |        |
| Male                                   | 1.70 (1.09, 2.64) | <0.05 | 1.32 (1.01, 1.73) | <0.05 | 0.71 (0.63, 0.80) | <0.001 |
| Female                                 | Reference         |       | Reference         |       | Reference         |        |
| Region                                 |                   |       |                   |       |                   |        |
| Barisal                                | 0.59 (0.27, 1.30) | <0.05 | 0.82 (0.51, 1.30) | <0.05 | 0.74 (0.59, 0.92) | <0.001 |
| Chittagong                             | 0.34 (0.16, 0.71) |       | 0.50 (0.32, 0.77) |       | 1.16 (0.97, 1.38) |        |
| Khulna                                 | 0.72 (0.35, 1.50) |       | 0.91 (0.57, 1.44) |       | 0.96 (0.79, 1.17) |        |
| Rajshahi                               | 1.12 (0.63, 1.99) |       | 1.02 (0.68, 1.53) |       | 0.73 (0.60, 0.89) |        |
| Rangpur                                | 0.68 (0.35, 1.29) |       | 0.99 (0.66, 1.51) |       | 0.81 (0.65, 0.99) |        |
| Sylhet                                 | 0.83 (0.36, 1.88) |       | 0.92 (0.53, 1.61) |       | 1.24 (1.03, 1.50) |        |
| Dhaka                                  | Reference         |       | Reference         |       | Reference         |        |

\*Odds ratios were adjusted for maternal age at childbirth, birth order, maternal education, maternal wealth index, maternal employment status, area of residence, maternal BMI, maternal desire of pregnancy, ever use of contraceptive method, number of ANC visits, ANC by SBA, history of any previous pregnancy loss, sex of infant and region

Table 3: Adjusted odds ratios for the association between preceding birth intervals and adverse pregnancy outcomes by history of pregnancy loss: BDHS 1996-2014

| Predictors                                                   | First-day neonatal mortality<br>N=21,382 |         | Early neonatal mortality<br>N=21,382 |         | Small birth size<br>N=11,022 |         |
|--------------------------------------------------------------|------------------------------------------|---------|--------------------------------------|---------|------------------------------|---------|
|                                                              | aOR (95% CI)                             | P value | aOR (95% CI)                         | P value | aOR (95% CI)                 | P value |
| Preceding birth interval in months*history of pregnancy loss |                                          |         |                                      |         |                              |         |
| <36 months                                                   | 2.12 (0.74, 6.13)                        | 0.28    | 1.77 (0.90, 3.49)                    | 0.19    | 0.96 (0.69, 1.33)            | 0.38    |
| 36-59 months                                                 | Reference                                |         | Reference                            |         | Reference                    |         |
| ≥60 months                                                   | 2.15 (0.73, 6.31)                        |         | 1.74 (0.84, 3.62)                    |         | 1.18 (0.87, 1.59)            |         |

\*Odds ratios were adjusted for maternal age at childbirth, birth order, maternal education, maternal wealth index, maternal employment status, area of residence, maternal BMI, maternal desire of pregnancy, ever use of contraceptive method, number of ANC visits, ANC by SBA, sex of infant and region

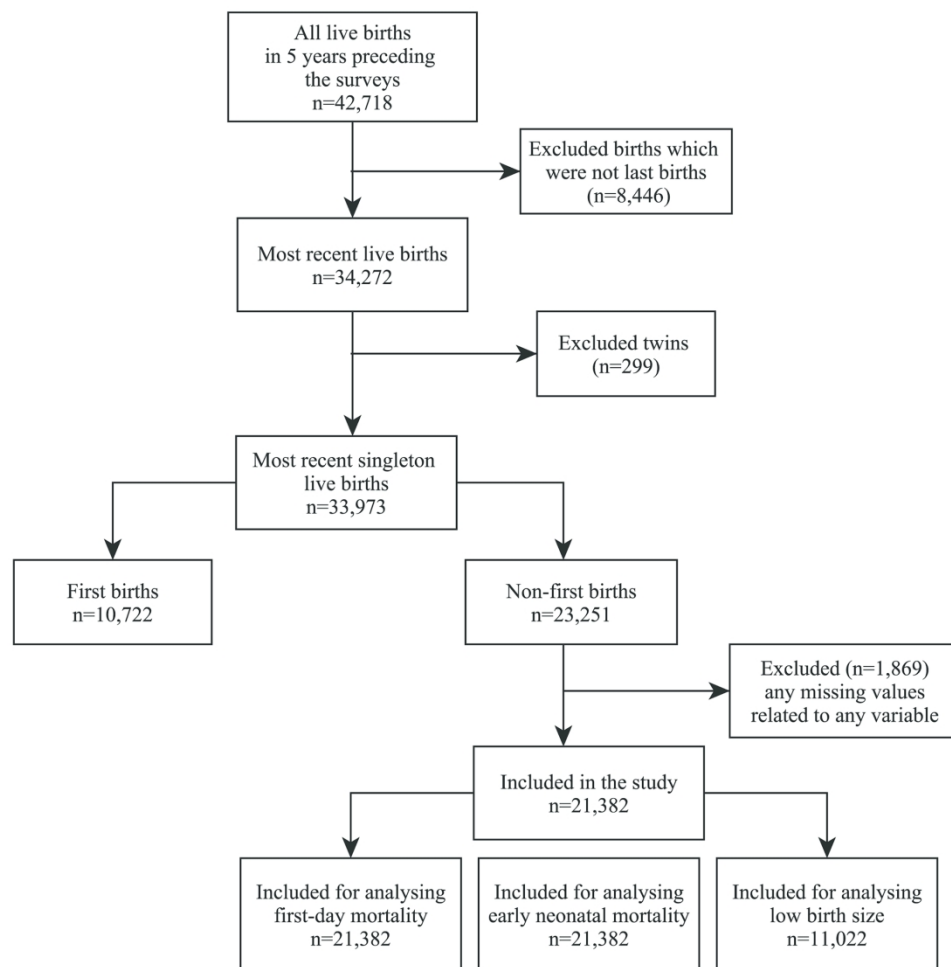

Figure 1: Flow diagram showing sample selection for first-day neonatal mortality, early neonatal mortality and small birth size analysis

203x205mm (300 x 300 DPI)

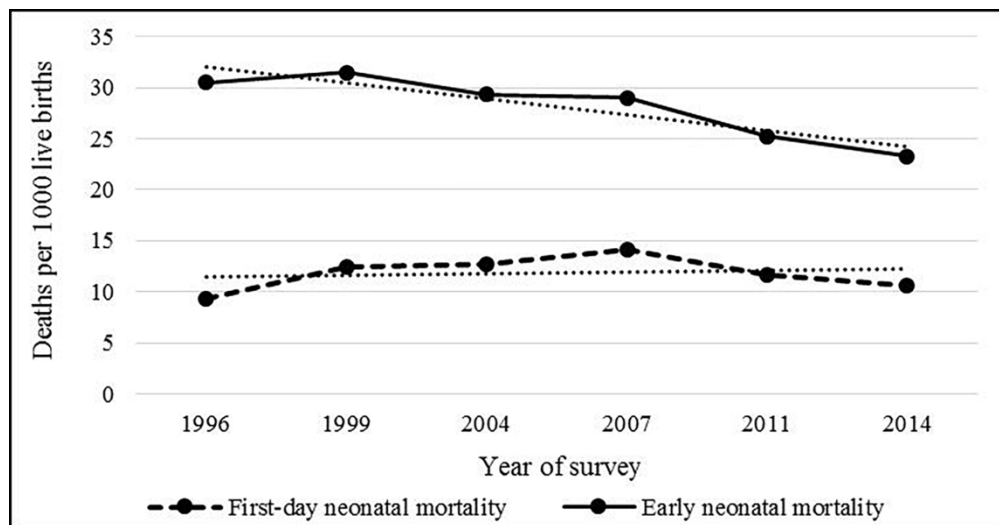

Figure 2: Trends in first-day and early neonatal mortality by year of survey (1996-2014)

191x99mm (300 x 300 DPI)

1  
2  
3  
4  
5  
6  
7  
8  
9  
10  
11  
12  
13  
14  
15  
16  
17  
18  
19  
20  
21  
22  
23  
24  
25  
26  
27  
28  
29  
30  
31  
32  
33  
34  
35  
36  
37  
38  
39  
40  
41  
42  
43  
44  
45  
46  
47  
48  
49  
50  
51  
52  
53  
54  
55  
56  
57  
58  
59  
60

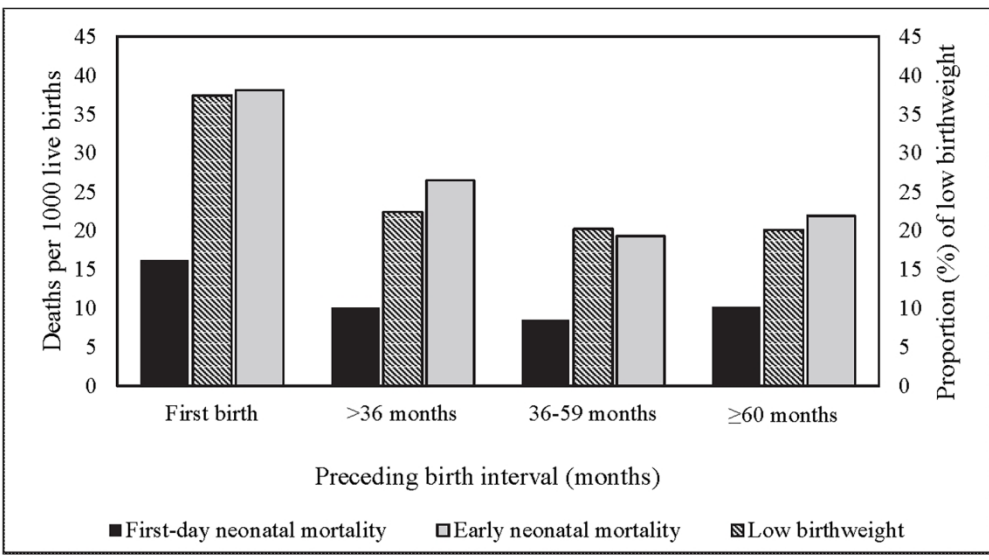

Figure 3: First-day neonatal mortality, early neonatal mortality rates per 1000 live births and the proportion of small birth size by preceding birth intervals

178x99mm (300 x 300 DPI)

# BMJ Open

## Risk of adverse pregnancy outcomes associated with short and long birth intervals in Bangladesh: evidence from six Bangladesh Demographic and Health Surveys, 1996-2014

|                                 |                                                                                                                                                                                                                                                                                                                                                                      |
|---------------------------------|----------------------------------------------------------------------------------------------------------------------------------------------------------------------------------------------------------------------------------------------------------------------------------------------------------------------------------------------------------------------|
| Journal:                        | <i>BMJ Open</i>                                                                                                                                                                                                                                                                                                                                                      |
| Manuscript ID                   | bmjopen-2018-024392.R1                                                                                                                                                                                                                                                                                                                                               |
| Article Type:                   | Research                                                                                                                                                                                                                                                                                                                                                             |
| Date Submitted by the Author:   | 28-Sep-2018                                                                                                                                                                                                                                                                                                                                                          |
| Complete List of Authors:       | Nisha, Monjura; The University of Sydney, Sydney School of Public Health<br>Alam, Ashraful; The University of Sydney, Sydney School of Public Health<br>Islam, Mohammad Tajul; Save the Children Bangladesh<br>Huda, Tanvir ; The University of Sydney, Sydney School of Public Health<br>Raynes-Greenow, Camille; The University of Sydney, School of Public Health |
| <b>Primary Subject Heading</b>: | Public health                                                                                                                                                                                                                                                                                                                                                        |
| Secondary Subject Heading:      | Epidemiology                                                                                                                                                                                                                                                                                                                                                         |
| Keywords:                       | First-day neonatal death, Early neonatal death, Small birth size, Pregnancy outcome, Birth interval, Bangladesh                                                                                                                                                                                                                                                      |
|                                 |                                                                                                                                                                                                                                                                                                                                                                      |

SCHOLARONE™  
Manuscripts



1  
2  
3 **1 Risk of adverse pregnancy outcomes associated with short and long birth intervals in**  
4  
5 **2 Bangladesh: evidence from six Bangladesh Demographic and Health Surveys, 1996-**  
6  
7 **3 2014**  
8  
9

10 4 Monjura Khatun Nisha<sup>1</sup>

11  
12 \*Corresponding author

13  
14 E-mail: mnis2091@uni.sydney.edu.au

15  
16  
17 7 Ashraful Alam<sup>1</sup>

18  
19 Email: neeloy.alam@sydney.edu.au

20  
21 9 Mohammad Tajul Islam<sup>2</sup>

22  
23 Email: abc.taj@gmail.com

24  
25  
26 11 Tanvir Huda<sup>1</sup>

27  
28 Email: tanvir.huda@sydney.edu.au

29  
30  
31 13 Camille Raynes-Greenow<sup>1</sup>

32  
33 Email: camille.raynes-greenow@sydney.edu.au

34  
35 15

36  
37 16

38  
39  
40 <sup>1</sup>The University of Sydney, Sydney School of Public Health, Edward Ford Building (A27),

41  
42 NSW 2006, Australia

43  
44 <sup>2</sup>Save the Children, Dhaka, Bangladesh

45  
46 20

47  
48 21

49  
50 22 Word count: 4031 words (excluding abstract, keywords, strengths and limitations of this  
51  
52 23 study, acknowledgement, author's contribution, conflict of interest, tables and figures)

53  
54 24

55  
56 25

## 26 **ABSTRACT**

### 27 **Objective**

28 To examine the effect of short (<36 months) and long ( $\geq 60$  months) birth intervals on adverse  
29 pregnancy outcomes in Bangladesh.

### 30 **Design, setting and participants**

31 We analysed data from six Bangladesh Demographic and Health Surveys (1996-1997, 1999-  
32 2000, 2004, 2007, 2011 and 2014). We included all singleton non-first live births, most  
33 recently born to the mothers within five years preceding each survey (n=21,382). We defined  
34 birth interval according to previous literature which suggests that a birth interval between 36  
35 and 59 months is the most ideal interval. Bivariate and multivariable analyses were conducted  
36 to obtain the crude and adjusted odds ratio (aOR) respectively to assess the odds of first-day  
37 neonatal death, early neonatal death and small birth size for both short (<36 months) and long  
38 ( $\geq 60$  months) spacing between births.

### 39 **Main outcome measures**

40 First-day neonatal death, early neonatal death and small birth size.

### 41 **Results**

42 In the multivariable analysis, compared to births spaced 36-59 months, infants with birth  
43 intervals of less than 36 months were associated with the increased odds of first-day neonatal  
44 death (aOR: 2.11, 95% CI: 1.17, 3.78) and early neonatal death (aOR: 1.58, 95% CI: 1.13,  
45 2.22). Compared to births spaced 36-59 months, infants with birth interval of  $\geq 60$  months,  
46 were associated with the increased odds of first-day neonatal death (aOR: 2.02, 95% CI: 1.10,  
47 3.73) and small birth size (aOR: 1.17, 95% CI: 1.02, 1.34). When there was a history of any  
48 previous pregnancy loss, there was an increase in the odds of first-day and early neonatal  
49 death for both short and long birth intervals, although there was no association.

## 50 **Conclusions**

51 Birth intervals shorter than 36 months and longer than 59 months are associated with the  
52 increased risk of adverse pregnancy outcomes. Care-providers, program managers and  
53 policymakers should focus on promoting the optimal birth interval between 36-59 months in  
54 postpartum family planning.

55 **Key words:** Pregnancy outcome, birth interval, first-day neonatal death, early neonatal death,  
56 small birth size, Bangladesh

## 58 **Strengths and limitations of this study**

- 59 • The main strength of this study is the use of a large sample from six nationally  
60 representative surveys of Bangladesh with a very high response (98%).
- 61 • We used the information of the most recent births within the 5 years preceding the  
62 surveys in order to minimise recall bias.
- 63 • Our study is the first in Bangladesh which analysed the effect of birth intervals and  
64 other risk factors for first-day neonatal mortality.
- 65 • Demographic and Health Survey data is cross-sectional, which reduces the ability to  
66 infer causation.
- 67 • Demographic and Health Survey data uses maternal perceptions of infant birth size as  
68 a proxy for birthweight which may be a limitation.

## 70 BACKGROUND

71 Adverse pregnancy outcomes such as stillbirth, early neonatal mortality and low birthweight  
72 are of considerable public health significance. Globally, perinatal mortality (stillbirth and  
73 early neonatal mortality) accounts for more than 6 million deaths every year. Of those,  
74 approximately 2 million newborns die in the early neonatal period.<sup>1</sup> The risk is greatest on the  
75 first day of life, approximately 1 million newborns die within the first 24 hours.<sup>1</sup> Further, low  
76 birthweight, occurs in more than 20 million newborns worldwide, which is a major indicator  
77 of perinatal mortality and contributes to up to 80% of neonatal mortality.<sup>2</sup> The greatest  
78 proportion of perinatal deaths and low birthweight (97-99%) occur in Low and Middle-  
79 Income Countries (LMIC).<sup>3</sup>

80 Several interventions have been suggested to address adverse pregnancy outcomes, such as  
81 pregnancy spacing.<sup>4</sup> Both short and long birth intervals have been reported to be associated  
82 with an increased risk of a number of adverse perinatal outcomes.<sup>5 6</sup> Current World Health  
83 Organization (WHO) guidelines recommend an interval of at least 24 months before  
84 attempting the next pregnancy after a live birth (i.e. birth-to-pregnancy interval) in order to  
85 reduce any adverse pregnancy outcomes.<sup>7</sup> Thus, the birth-to-birth interval should be at least  
86 33 months by including nine months of pregnancy to the recommended 24 months.<sup>8</sup> In an  
87 analysis of Demographic and Health Survey data from 17 developing countries, Rutstein  
88 suggested that the optimal birth interval should be between 36 and 59 months as each birth  
89 interval less than 36 and more than 59 months showed a tendency towards neonatal mortality  
90 and morbidity.<sup>9</sup> The WHO highlighted the necessity of future research investigating the  
91 association between birth interval and adverse pregnancy outcomes.<sup>7</sup>

92 Bangladesh has high perinatal mortality (44 per 1000 pregnancies) and morbidity,<sup>10</sup> where  
93 birth spacing remains a problem.<sup>11</sup> Between the year 1993 and 2014, though the median birth

1  
2  
3 94 interval increased by 49% (from 35 months to 52 months), approximately 30% of non-first  
4  
5 95 births occurred within less than 36 months (7 months to 35 months) following the previous  
6  
7 96 birth.<sup>10</sup> However, another 40% of non-first births occurred following a birth interval of more  
8  
9 97 than 59 months.<sup>10</sup> Of the papers investigating birth interval in Bangladesh, most have  
10  
11 98 focussed on the effect of short birth interval and have not considered a long birth interval as a  
12  
13 99 risk of adverse perinatal outcome.<sup>12 13</sup> Given the changing demographics in Bangladesh and  
14  
15  
16 100 increase in proportion of longer birth intervals, our objective therefore was to examine  
17  
18 101 whether the preceding birth interval (short or long) was independently associated with  
19  
20 102 increased risk of adverse pregnancy outcomes including first-day neonatal mortality, early  
21  
22 103 neonatal mortality and low birthweight using pooled data from the Bangladesh Demographic  
23  
24 104 and Health Surveys (BDHS).

## 105 **METHODS**

### 106 **Data source**

107 We used the BDHS data from the years; 1996-1997, 1999-2000, 2004, 2007, 2011 and 2014.  
108 BDHS is a nationally representative household survey carried out every three to four years  
109 under the authority of the National Institute of Population Research and Training of the  
110 Ministry of Health and Family Welfare. The survey employed a two-stage stratified cluster-  
111 sampling design with rural and urban samples to collect information from ever-married  
112 women aged 15-49 years and ever-married men 15-54 years about demographic and health  
113 status. Data were obtained from the website; [www.measuredhs.com](http://www.measuredhs.com). The BDHS consists of  
114 three types of questionnaires: household, women, and men. Our analysis was limited to the  
115 information obtained from the women's and household questionnaires. We pooled the data  
116 files from six surveys into a dataset and analysed the live births occurring during the five  
117 years preceding the surveys. Demographic and Health Survey program employs standardised  
118 data collection procedures using standard model questionnaires to ensure consistent content

1  
2  
3 119 over time and across countries allowing comparability across populations cross-sectionally  
4  
5 120 and over time.<sup>14</sup> We selected six surveys in this pooled analysis based on the similarities in  
6  
7 121 sampling design, comparability of survey questionnaires for focus variables of this analysis,  
8  
9 122 and availability of data for the pooled analysis. In our analysis, we included the data from all  
10  
11 123 singleton, non-first, most recent live-born children within the five years preceding the six  
12  
13 124 BDHSs, 1996-1997, 1999-2000, 2004, 2007, 2011 and 2014.

### 125 **Outcome variables**

126 We conducted three analyses', with three different outcome variables- 'first-day neonatal  
127 death', 'early neonatal death' and 'small birth size'. First-day deaths were defined as deaths  
128 during the first 24 hours after birth (day 0) among live-born children and early neonatal  
129 deaths were deaths between the age of 0 to 6 days among live-born children. These two  
130 outcome variables overlap, but conform to standard definitions. We used 'small birth size' as  
131 a proxy for low birthweight. Estimates about birthweight are not collected by the BDHS.  
132 'Mother's perception of the baby's birth size' is routinely used as a proxy indicator of  
133 birthweight. For our analysis, we defined 'small birth size' as the birth size of an infant which  
134 was perceived as either 'very small' or 'smaller than average'. Each of the outcome variables  
135 was considered dichotomous for this analysis as yes (1) or no (0).

### 136 **Exposure variable**

137 The main exposure variable used in our analysis was the length of the preceding birth interval  
138 as a measure of birth spacing. This was measured as the number of months between two  
139 successive live births.<sup>9 15</sup> We followed Rutstein's recommendation regarding optimal birth  
140 interval of 36-59 months for our analysis.<sup>9</sup> We categorised preceding birth interval in months  
141 as short (<36 months) or long ( $\geq$  60 months) birth intervals for our analysis; where the birth  
142 interval of 36-59 months was the reference category.

### 143 **Covariates**

144 Covariates included maternal age at childbirth (19 years or below, 20-34 years and 35 years  
145 or more), maternal education (none, primary and secondary or higher), birth order (2-3,  $\geq 4$ ),  
146 maternal Body Mass Index (BMI) (underweight, average, overweight and obese), area of  
147 residence (urban and rural), wealth index (poorest quintile, second quintile, middle quintile,  
148 fourth quintile and richest quintile), maternal employment status during survey (currently  
149 working and not working), maternal desire of pregnancy (yes and no), ever use of  
150 contraception (yes and no), number of Antenatal Care (ANC) visits (none, 1-3 visits and  $\geq 4$   
151 visits), ANC by Skilled Birth Attendants (SBA) (yes and no), history of any previous loss of  
152 pregnancy (yes and no), sex of baby (female and male) and region (Dhaka, Barisal,  
153 Chittagong, Khulna, Rajshahi, Rangpur and Sylhet).

154 We constructed the wealth index variable using principle component analysis through  
155 ranking the available wealth variables in the pooled BDHS dataset such as housing materials,  
156 type of toilet facility, source of drinking water, type of cooking fuel, availability of  
157 electricity, ownership of assets (radio, television, fridge etc.), adjusted for urban-rural  
158 differences. We constructed the 'ever use of contraception' variable from calendar data of  
159 women's dataset for each year, where ever use of contraception was recorded if there was any  
160 contraceptive practice at anytime.

### 161 **Data analysis**

162 The 'first-day neonatal mortality' and 'early neonatal mortality' variables were calculated  
163 from the birth history data, where age at death was recorded in days if they were less than 30  
164 days old. 'Small birth size' was calculated from the birth history data, based on the  
165 perceptions of mothers about their infant's birth size. Frequencies with weighted percentage  
166 were calculated for the selected variables to describe the characteristics of the women who  
167 had a 'first-day neonatal death', an 'early neonatal death' and a 'small birth size' infant. We

1  
2  
3 168 conducted bivariate analysis to ascertain the unadjusted association between each of the  
4  
5 169 independent variables and each outcome separately, and multivariable analysis was  
6  
7 170 performed to obtain the adjusted odds ratio (aOR). All covariates associated with each of  
8  
9 171 outcomes at the p value  $\leq 0.25$  in unadjusted analysis were included in the final model of  
10  
11 172 multivariable logistic regression. Also, some other covariates (maternal education, maternal  
12  
13 173 wealth status, maternal area of residence, maternal desire of pregnancy, number of ANC and  
14  
15 174 ANC by SBA) were included in the final model regardless of their significant levels because  
16  
17 175 of being known risk factors of adverse pregnancy outcomes based on several previous  
18  
19 176 literature.<sup>9 16 17 18</sup> We also checked the variables for multicollinearity. The wald test was used  
20  
21 177 to assess statistical significance with 95% confidential intervals (CI). The association was  
22  
23 178 adjusted for potential confounders including maternal age at childbirth, birth order, maternal  
24  
25 179 education, maternal wealth index, maternal employment status, area of residence, maternal  
26  
27 180 BMI, maternal desire of pregnancy, ever use of contraceptive method, number of ANC visits,  
28  
29 181 ANC by SBA, history of any previous pregnancy loss, sex of infant and region. We also  
30  
31 182 restricted our analysis by 'history of any previous pregnancy loss' to assess the combined  
32  
33 183 effect of history of any previous pregnancy loss and birth interval (short or long) on all three  
34  
35 184 outcomes. We followed the direct life table approach to calculate first-day and early neonatal  
36  
37 185 mortality rates per 1000 live births. All analyses were carried out using STATA version 14.2.  
38  
39 186 We used the 'svy' command in all our analyses to calculate the weighted values in order to  
40  
41 187 adjust for the clustering effect and sample stratification.

42  
43  
44  
45  
46  
47 188 We obtained permission from Monitoring and Evaluation to Assess and Use Results  
48  
49 189 Demographic and Health Surveys (MEASURE DHS) to download the data from the DHS  
50  
51 190 online archive. Ethics approval was not required for our analyses', as the data were  
52  
53 191 anonymous and publicly available.



1  
2  
3 192 **Patient involvement**

4  
5 193 No patients were involved in this study.  
6  
7

8 194 **Figure 1: Flow diagram showing sample selection for first-day neonatal mortality, early**  
9  
10 195 **neonatal mortality and small birth size analysis**

11  
12  
13 196 **RESULTS**

14  
15 197 Over the six surveys, and approximately 18 years of data, a total of 42,718 live births were  
16  
17 198 recorded who were born to the mothers aged 15-49 years within the five years preceding the  
18  
19 199 surveys with a high response (approximately 98%) (Figure 1). From the year 1996 to 2014,  
20  
21 200 there was a substantial decrease in the rate of overall early neonatal mortality (30.5 vs. 23.3  
22  
23 201 deaths per 1000 live births), but in terms of first-day neonatal mortality, we did not find any  
24  
25 202 consistent decrease, rather the rate has increased from 9.3 deaths in 1996 to 10.6 deaths in  
26  
27 203 2014 per 1000 live births (Figure 2). Rates of all three adverse pregnancy outcomes were  
28  
29 204 highest among the first-born infants followed by the infants whose births were spaced less  
30  
31 205 than 36 months (Figure 3).  
32  
33

34  
35 206 There were 33, 973 singleton live-born infants, most recently born to the mothers within the  
36  
37 207 five years preceding each survey. Of those, 10,722 (32%) were first-born infants who were  
38  
39 208 ineligible as there was no birth interval, which left 21,382 non-first singleton live-born  
40  
41 209 infants in our final analysis for first-day and early neonatal mortality. For small birth size, our  
42  
43 210 analysis consisted of 11,022 singleton live-born children, for the years 1999-2000, 2011 and  
44  
45 211 2014, as the information regarding small birth size was not available for the surveys in 1996-  
46  
47 212 1997, 2004 and 2007 (Figure 1).  
48  
49

50  
51 213 Of the 21,382 non-first singleton most recently live-born infants of six surveys, there were  
52  
53 214 115 first-day and 274 early neonatal deaths. Of 11,022 non-first singleton most recently live-  
54  
55 215 born infants of three surveys, there were 2002 infants with a birth size smaller than average.  
56  
57

1  
2  
3 216 **Figure 2: Trends in first-day and early neonatal mortality by year of survey (1996-2014)**

4  
5  
6 217 **Figure 3: First-day neonatal mortality, early neonatal mortality rates per 1000 live**  
7  
8 218 **births and the proportion of small birth size by preceding birth intervals**

9  
10  
11 219 **First-day neonatal mortality**

12  
13 220 Nearly half of the infants who died on the first-day (n=49) were born following a short birth  
14  
15 221 interval, another 44 infants who died on day '0' (36.0%) were born following a long birth  
16  
17 222 interval. Overall, mothers of the infants who died on the day '0' were more frequently aged  
18  
19 223 between 20 and 34 years (67.5%, n=82), did not have any formal education (36.4%, n=40),  
20  
21 224 had a parity 2-3 (63.3%, n=73), had an average BMI (59.2%, n=67) and lived in a rural area  
22  
23 225 (79.2%, n=80) (64.1%, n=74) (Table 1).

24  
25  
26 226 **Early neonatal mortality**

27  
28 227 A large proportion of deaths in the early neonatal period was attributable to day '0' deaths  
29  
30 228 (42.8%, n=115). Approximately 45% of infants (n=122) who died within 7 days of birth were  
31  
32 229 born following a short birth interval. Also, a relatively higher proportion (29% vs. 26%) of  
33  
34 230 early neonatal deaths had a long birth interval compared to the recommended birth interval  
35  
36 231 (36-59 months). The socio-demographic characteristics of the mothers of the infants who  
37  
38 232 died in the early neonatal period was quite similar to the day '0' findings, and the proportion  
39  
40 233 of early neonatal mortality was highest among infants born to mothers aged 20-34 years  
41  
42 234 (71.5%, n=200), had a parity 2-3 (60.0%, n=163), did not have any formal education (42.0%,  
43  
44 235 n=116), lived in a rural area (81.0%, n=193), had an average BMI (58.4%, n=156) and did  
45  
46 236 not have any ANC (55.2%, n=146) (Table 1).

47  
48  
49  
50  
51 237 **Small birth size**

52  
53 238 More than one-third of infants with a small birth size (34.6%, n=698) were born with a short  
54  
55 239 birth interval. A similar proportion of infants with a small birth size (34.2%, n=694) were

1  
2  
3 240 born with a long birth interval. The highest proportion of infants perceived as small birth size  
4  
5 241 were born to the mothers aged 20-34 years (80.0%, n=1599), had a parity 2-3 (65.8%,  
6  
7 242 n=1322), had no formal education (38.3%, n=751), had an average BMI (54.4%, n=1069),  
8  
9 243 lived in rural area (79.9%, n=1445) and did not have any ANC (51.4%, n=998) (Table 1).

#### 11 244 **Association of birth intervals with first-day neonatal mortality**

12  
13  
14 245 In the multivariable analysis, both short and long birth intervals were associated with the  
15  
16 246 increased odds of first-day neonatal death. Compared to infants born following a birth  
17  
18 247 interval of 36-59 months, infants with a short birth interval were 2.11 times more likely to die  
19  
20 248 within 24 hours of life (95% CI: 1.17, 3.78). We also found that infants born after a long birth  
21  
22 249 interval, compared to those born following a birth interval of 36-59 months had a 2.02 times  
23  
24 250 higher odds of dying within 24 hours of life (95% CI: 1.10, 3.73) (Table 2).

#### 25 251 **Association of birth intervals with early neonatal mortality**

26  
27  
28 252 After adjustment for potential confounders, early neonatal mortality was associated with a  
29  
30 253 short birth interval, while for long birth intervals there was no association. Compared to the  
31  
32 254 infants with a birth interval of 36-59 months, infants born with a short birth interval had 1.58  
33  
34 255 times higher odds of dying within 7 days of life (95% CI: 1.13, 2.22). Though the odds of  
35  
36 256 early neonatal mortality were greater for long birth intervals compared to the reference group,  
37  
38 257 there was no association (aOR: 1.23, 95% CI: 0.84, 1.81) (Table 2).

#### 39 258 **Association of birth intervals with small birth size**

40  
41  
42 259 Long birth intervals appeared to be associated with the increased odds of small birth size  
43  
44 260 compared to the reference birth interval (aOR: 1.17, 95% CI: 1.02, 1.34), while for short birth  
45  
46 261 intervals, the odds of small birth size were smaller (aOR: 1.04, 95% CI: 0.89, 1.20) compared  
47  
48 262 to the reference birth interval (Table 2).

1  
2  
3 263 A history of pregnancy loss can be a determinant of birth interval and we therefore restricted  
4  
5 264 our analysis to the children whose mothers had a history of any previous pregnancy loss for  
6  
7 265 all three outcomes. However, we found no relationship for either short or long birth intervals  
8  
9 266 with all three outcomes, though for both short and long birth intervals there was an increase  
10  
11 267 in the odds for first-day and early neonatal death (Table 3).  
12  
13

## 14 268 **DISCUSSION**

15  
16 269 This study suggests that both short and long birth intervals were associated with the increased  
17  
18 270 odds of adverse pregnancy outcomes. Over the six surveys, a major proportion of infants who  
19  
20 271 died on the first-day, or in the first week or with a small birth size were born before the  
21  
22 272 recommended optimal period of birth interval (36–59 months). We found that a birth-to-birth  
23  
24 273 interval shorter than 36 months was associated with an increased odds of multiple adverse  
25  
26 274 pregnancy outcomes including first-day neonatal mortality and early neonatal mortality. Also,  
27  
28 275 a birth-to-birth interval longer than 59 months was associated with an increased odds of first-  
29  
30 276 day neonatal mortality and small birth size.  
31  
32  
33

34 277 Infants born with a short birth-to-birth interval of less than 36 months were associated with  
35  
36 278 higher odds of first-day neonatal mortality. Several studies have reported the association of a  
37  
38 279 short birth interval with perinatal or neonatal mortality.<sup>19 20</sup> However, to the best of our  
39  
40 280 knowledge, no prior research has examined the effect of birth interval on first-day neonatal  
41  
42 281 mortality individually. Further, we found that the odds of early neonatal mortality were also  
43  
44 282 greater among infants who were born following a short birth interval. This is consistent with  
45  
46 283 the findings of a few earlier investigations from LMIC's which examined the effect of short  
47  
48 284 birth intervals on perinatal, early neonatal or neonatal mortality.<sup>19 20</sup> Similar to our findings, a  
49  
50 285 previous study conducted in India reported an association of neonatal death with a birth  
51  
52 286 interval of less than 36 months (aOR: 1.78, 95% CI: 1.63, 1.94), compared to births spaced  
53  
54 287 36–59 months.<sup>20</sup> Again, an analysis of 47 Demographic Health Surveys from LMIC also  
55  
56  
57  
58  
59  
60

1  
2  
3 288 supports our finding of higher odds of early neonatal mortality for short birth intervals,  
4  
5 289 though this analysis has used a slightly different definition of both short (<24 months) and the  
6  
7 290 reference category birth interval (24-<60 months).<sup>21</sup> Also, our finding is in line with the  
8  
9 291 finding of a previous study conducted in Matlab, Bangladesh, where they reported an  
10  
11 292 increased risk of very short birth intervals (less than 15 months) on early neonatal mortality  
12  
13 293 compared to those born after 36-59 months, though in their study the risk of early neonatal  
14  
15 294 mortality goes down as the birth interval increases up to a minimum of 24-59 months, which  
16  
17 295 is not consistent with our findings.<sup>12</sup> Furthermore, we did not find any significant association  
18  
19 296 between short birth interval and small birth size, although infants born following a short  
20  
21 297 interval were at increased odds of being born with a small birth size. In the BDHS,  
22  
23 298 birthweight is not routinely collected and birth size is based on maternal perception which  
24  
25 299 could lead to some errors in the estimation of small birth size and may be responsible for this  
26  
27 300 non-association. However, the direction of the effect is consistent with several earlier  
28  
29 301 investigations including a meta-analysis of 69 studies from both developing and developed  
30  
31 302 countries.<sup>4 19 22</sup>

32  
33  
34  
35  
36 303 Several hypotheses have been proposed to explain the association of short birth interval on  
37  
38 304 adverse pregnancy outcomes.<sup>23</sup> One of the most frequently used hypotheses is the maternal  
39  
40 305 nutritional depletion phenomenon, which has been defined by Winkvist et al. as a negative  
41  
42 306 change in maternal nutritional status during a reproductive cycle, mostly due to the biological  
43  
44 307 competition between mother and the growing fetus.<sup>24-26</sup> Short birth spacing does not allow  
45  
46 308 mothers sufficient time to restore nutritional reserves needed to support fetal growth and  
47  
48 309 development during the subsequent pregnancy. This eventually causes maternal nutritional  
49  
50 310 depletion that leads to the increase risk of adverse pregnancy outcomes among the births  
51  
52 311 spaced after a short interval. Another explanation is that the association of short birth  
53  
54 312 intervals and adverse pregnancy outcomes could be confounded by other factors including  
55  
56  
57  
58  
59  
60

1  
2  
3 313 young maternal age, lower socio-economic status and lower utilisation of health services.<sup>27 28</sup>

4  
5 314 In our analysis, after adjusting for maternal age, socio-economic factors, and maternal  
6  
7 315 characteristics as well as health service related factors, short birth interval remained  
8  
9 316 associated with first-day and early neonatal mortality which is in line with other studies from  
10  
11 317 both LMIC and high income countries which controlled for similar variables.<sup>12 15 29 30</sup>

13  
14 318 Our study further identified the association of long birth interval with adverse perinatal  
15  
16 319 outcomes and found that infants born after a long birth interval were associated with greater  
17  
18 320 odds of first-day neonatal mortality. The effect of long birth interval for early neonatal  
19  
20 321 mortality was also greater but was not significant. There are only a few published studies on  
21  
22 322 the effect of a long birth interval on adverse pregnancy outcome in LMIC and the results are  
23  
24 323 conflicting.<sup>4 19 20</sup> In contrast to our findings, a previous investigation conducted in India,  
25  
26 324 which examined the effect for long birth interval for perinatal death, did not find any  
27  
28 325 association,<sup>19</sup> and a pooled analysis of 47 Demographic Health Surveys examined the effect  
29  
30 326 of longer interval for neonatal mortality and found that the odds were lower for the longer  
31  
32 327 preceding birth intervals ( $\geq 60$  months) (OR: 0.80, 95% CI: 0.67, 0.95) compared to the birth  
33  
34 328 interval of 24-<60 months.<sup>21</sup> The inconsistency in findings could be attributed to  
35  
36 329 methodological differences in both the reference category (36-59 months vs. 24-<60 months)  
37  
38 330 of the main exposure variable and the difference in the outcome variable (early neonatal  
39  
40 331 mortality vs. neonatal mortality). However, our findings are consistent with a meta-analysis  
41  
42 332 which reported higher odds of early neonatal mortality with a longer interval,<sup>4</sup> and Rutstein's  
43  
44 333 study which analysed data from 17 developing countries with the same finding.<sup>9</sup> Again, we  
45  
46 334 found that a long birth interval was associated with a greater odds of small birth size. This is  
47  
48 335 similar to a few prior studies which also reported the detrimental effect of a long birth  
49  
50 336 interval on birth size.<sup>4 19 31</sup>

1  
2  
3 337 The increased odds of adverse pregnancy outcomes for long birth intervals may be due to  
4  
5 338 some concurrent factors such as advanced maternal age and previous history of pregnancy  
6  
7 339 loss. In an earlier investigation, Zhu et al. explained the association between long birth  
8  
9 340 intervals and adverse pregnancy outcomes through the gradual decline in the maternal  
10  
11 341 physiological and anatomical capacities of the reproductive system, hypothesising that if a  
12  
13 342 woman does not conceive for an extended time after a delivery, her physiological  
14  
15 343 characteristics may return to her primigravid state.<sup>32</sup>  
16  
17

### 18 344 **Strengths and limitations**

19  
20 345 The main strength of our study is that it was based on a large nationally representative sample  
21  
22 346 from six surveys within an 18-year time period in a single country which would improve the  
23  
24 347 homogeneity of the data. We restricted our analysis to the most recent live births within the  
25  
26 348 five years prior to the interview date to minimise recall bias. Furthermore, we were able to  
27  
28 349 add a number of potential confounding factors.  
29  
30

31 350 We acknowledge some methodological limitations. First, this is a cross-sectional data, which  
32  
33 351 may limit the identification of a causal relationship between the birth interval and adverse  
34  
35 352 pregnancy outcomes. Secondly, BDHS data relies on maternal recall and report of the  
36  
37 353 information regarding preceding birth intervals and the days of infant deaths, which is subject  
38  
39 354 to recall bias. Third, there is a possibility of underreporting of infant deaths, as birth histories  
40  
41 355 and infant survival information were only collected from surviving mothers and there is a  
42  
43 356 strong association between maternal and infant deaths. Fourth, we acknowledge a limitation  
44  
45 357 of using maternal perception on birth size instead of birthweight in our analysis due to  
46  
47 358 unavailability of actual estimates of birthweight in BDHS, which may reflect newborn's  
48  
49 359 overall health status rather than birthweight only. Fifth, as we pooled six BDHS datasets over  
50  
51 360 18 years, there may be a possibility of changes in the background characteristics of the  
52  
53 361 population over 18 years. Also, in our analysis, we were unable to include the variable  
54  
55  
56  
57  
58  
59

1  
2  
3 362 regarding the history of immediate previous adverse outcome such as stillbirth, miscarriage  
4  
5 363 etc. which is a major determinant of adverse perinatal outcomes in the subsequent pregnancy.  
6  
7 364 A previous investigation conducted in Bangladesh using dynamic panel data models, reported  
8  
9 365 that a previous adverse birth outcome may be subject to ‘scarring effect’ which leads to a  
10  
11 366 short birth interval (replacement) and thus increases the risk of mortality of the subsequent  
12  
13 367 infant (nutritional depletion); as a mother with a previous pregnancy loss may rush into a  
14  
15 368 pregnancy without properly recovering from the pregnancy loss.<sup>33</sup> In our analysis, we were  
16  
17 369 unable to consider the role of ‘scarring effect’ related to a previous adverse pregnancy  
18  
19 370 outcome which has an influence on birth interval. However, we were able to include the  
20  
21 371 variable ‘ever had a pregnancy loss’ in our analysis, but none of our outcome variables was  
22  
23 372 significant, though stratifying by that variable increased the effect sizes of first-day and early  
24  
25 373 neonatal mortality for both short and long birth intervals.  
26  
27  
28

## 374 **CONCLUSIONS**

375 Our analysis supports the reduced risk of adverse pregnancy outcomes following a birth-to-  
376 birth interval of 36-59 months which is consistent with the WHO recommendation of a birth-  
377 to-pregnancy interval of 24 months. Our results highlight several important implications for  
378 care-providers, program managers and policymakers by suggesting that a preceding birth  
379 interval of 36-59 months could prevent adverse pregnancy outcomes including first-day  
380 neonatal death, early neonatal death and low birthweight. Promoting an optimal birth interval  
381 of 36-59 months in postpartum family planning is needed.



1  
2  
3 382 **Acknowledgement**

4  
5 383 This paper is a part of MKN's PhD thesis. We are grateful to Sydney Medical School, The  
6  
7 384 University of Sydney for funding MKN's PhD (Early Career Researcher Postgraduate  
8  
9 385 Scholarship). We would like to thank MEASURE DHS and NIPORT for permitting us to  
10  
11 386 analyse the BDHS 1996-2014 datasets. CRG is funded by the National Health and Medical  
12  
13 387 Research Council Career Development Award #1087062.

14  
15  
16  
17 388 **Authors' contributions**

18  
19 389 MKN, CRG and AA conceptualised and designed the study. MKN performed the literature  
20  
21 390 review. MKN, CRG, MTI and TH performed statistical analysis. MKN and CRG drafted the  
22  
23 391 manuscript. MKN and CRG contributed to the interpretation of the data. MKN, CRG, AA  
24  
25 392 and MTI contributed to the critical revision of the manuscript. All the authors read and  
26  
27 393 approved the final manuscript.

28  
29  
30  
31 394 **Conflict of interest**

32  
33 395 We declare that we have no conflict of interest.

34  
35  
36 396 **Funding Statement**

37  
38 397 This research received no specific grant from any funding agency in the public, commercial  
39  
40 398 or not-for-profit sectors.

41  
42  
43 399 **Data sharing statement**

44  
45 400 The data are anonymous and publicly available in the website; [www.measuredhs.com](http://www.measuredhs.com).

## 401 REFERENCES

- 402 1. World Health Organization. Newborns: reducing mortality 2017 [Available from:  
403 <http://www.who.int/mediacentre/factsheets/fs333/en/> accessed 17 November 2017.
- 404 2. KUO C-P, LEE S-H, WU W-Y, et al. Low Birth Weight: Country, Regional and Global  
405 Estimates Low Birth Weight: Country, Regional and Global Estimates, 2004.
- 406 3. Organization WH. Care of the preterm and low-birth-weight newborn 2017 [Available  
407 from: [http://www.who.int/maternal\\_child\\_adolescent/newborns/prematurity/en/](http://www.who.int/maternal_child_adolescent/newborns/prematurity/en/) accessed 12  
408 December 2017.
- 409 4. Conde-Agudelo A, Rosas-Bermúdez A, Kafury-Goeta A. Birth spacing and risk of adverse  
410 perinatal outcomes: A meta-analysis. *JAMA* 2006;295(15):1809-23. doi:  
411 10.1001/jama.295.15.1809
- 412 5. Ekin A, Gezer C, Taner CE, et al. Impact of interpregnancy interval on the subsequent risk  
413 of adverse perinatal outcomes. *The journal of obstetrics and gynaecology research*  
414 2015;41(11):1744-51. doi: 10.1111/jog.12783 [published Online First: 2015/07/18]
- 415 6. Qin C, Mi C, Xia A, et al. A first look at the effects of long inter-pregnancy interval and  
416 advanced maternal age on perinatal outcomes: A retrospective cohort study. *Birth*  
417 2017;44(3):230-37. doi: 10.1111/birt.12289
- 418 7. World Health Organization. Report of a WHO Technical Consultation on Birth Spacing,  
419 2005.
- 420 8. Exavery A, Mrema S, Shamte A, et al. Levels and correlates of non-adherence to WHO  
421 recommended inter-birth intervals in Rufiji, Tanzania. *BMC Pregnancy and Childbirth*  
422 2012;12(1):152. doi: 10.1186/1471-2393-12-152
- 423 9. Rutstein SO. Effects of preceding birth intervals on neonatal, infant and under-five years  
424 mortality and nutritional status in developing countries: evidence from the demographic and  
425 health surveys. *International Journal of Gynecology & Obstetrics* 2005;89:S7-S24. doi:  
426 10.1016/j.ijgo.2004.11.012
- 427 10. National Institute of Population Research and Training (NIPORT) MaA, and ICF  
428 International. Bangladesh Demographic and Health Survey 2014. Dhaka, Bangladesh, and  
429 Rockville, Maryland, USA: NIPORT, Mitra and Associates, and ICF International, 2016.
- 430 11. Khan JR, Bari W, Latif AHMM. Trend of determinants of birth interval dynamics in  
431 Bangladesh. *BMC Public Health* 2016;16(1):934. doi: 10.1186/s12889-016-3577-9
- 432 12. Davanzo J, Hale L, Razzaque A, et al. The effects of pregnancy spacing on infant and  
433 child mortality in Matlab, Bangladesh: How they vary by the type of pregnancy outcome that  
434 began the interval. *Population Studies* 2008;62(2):131-54. doi: 10.1080/00324720802022089
- 435 13. de Jonge HC, Azad K, Seward N, et al. Determinants and consequences of short birth  
436 interval in rural Bangladesh: a cross-sectional study. *BMC Pregnancy and Childbirth*  
437 2014;14(1):427. doi: 10.1186/s12884-014-0427-6
- 438 14. Corsi DJ, Neuman M, Finlay JE, et al. Demographic and health surveys: a profile.  
439 *International Journal of Epidemiology* 2012;41(6):1602-13. doi: 10.1093/ije/dys184
- 440 15. Rutstein SO. Further evidence of the effects of preceding birth intervals on neonatal,  
441 infant, and under-five-years mortality and nutritional status in developing countries: Evidence  
442 from the demographic and health surveys. DHS Working Papers No 41. Calverton, Maryland,  
443 USA: Macro International, 2008.
- 444 16. Abir T, Agho KE, Page AN, et al. Risk factors for under-5 mortality: evidence from  
445 Bangladesh Demographic and Health Survey, 2004–2011. *BMJ Open* 2015;5(8) doi:  
446 10.1136/bmjopen-2014-006722

- 1  
2  
3 447 17. Ezeh OK. Trends and population-attributable risk estimates for predictors of early  
4 448 neonatal mortality in Nigeria, 2003–2013: a cross-sectional analysis. *BMJ Open* 2017;7(5)  
5 449 doi: 10.1136/bmjopen-2016-013350  
6 450 18. Ghimire PR, Agho KE, Renzaho A, et al. Socio-economic predictors of stillbirths in  
7 451 Nepal (2001–2011). *PLOS ONE* 2017;12(7):e0181332. doi: 10.1371/journal.pone.0181332  
8 452 19. Mahande MJ, Obure J. Effect of interpregnancy interval on adverse pregnancy outcomes  
9 453 in northern Tanzania: a registry-based retrospective cohort study. *BMC Pregnancy and*  
10 454 *Childbirth* 2016;16:140. doi: 10.1186/s12884-016-0929-5  
11 455 20. Williams EK, Hossain MB, Sharma RK, et al. Birth Interval and Risk of Stillbirth or  
12 456 Neonatal Death: Findings from Rural North India. *Journal of Tropical Pediatrics*  
13 457 2008;54(5):321-27. doi: 10.1093/tropej/fmn027  
14 458 21. Kozuki N, Walker N. Exploring the association between short/long preceding birth  
15 459 intervals and child mortality: using reference birth interval children of the same mother as  
16 460 comparison. *BMC Public Health* 2013;13(Suppl 3):S6-S6. doi: 10.1186/1471-2458-13-S3-S6  
17 461 22. Appareddy S, Pryor J, Bailey B. Inter-pregnancy interval and adverse outcomes:  
18 462 Evidence for an additional risk in health disparate populations. *The Journal of Maternal-*  
19 463 *Fetal & Neonatal Medicine* 2017;30(21):2640-44. doi: 10.1080/14767058.2016.1260115  
20 464 23. Miller JE. Birth intervals and perinatal health: an investigation of three hypotheses. *Fam*  
21 465 *Plann Perspect* 1991;23(2):62-70. [published Online First: 1991/03/01]  
22 466 24. Winkvist A, Rasmussen KM, Habicht JP. A new definition of maternal depletion  
23 467 syndrome. *Am J Public Health* 1992;82(5):691-4. [published Online First: 1992/05/01]  
24 468 25. King JC. The risk of maternal nutritional depletion and poor outcomes increases in early  
25 469 or closely spaced pregnancies. *The Journal of nutrition* 2003;133(5 Suppl 2):1732s-36s.  
26 470 [published Online First: 2003/05/06]  
27 471 26. Smits LJ, Essed GG. Short interpregnancy intervals and unfavourable pregnancy  
28 472 outcome: role of folate depletion. *Lancet* 2001;358(9298):2074-7. doi: 10.1016/s0140-  
29 473 6736(01)07105-7 [published Online First: 2002/01/05]  
30 474 27. Klebanoff MA. The interval between pregnancies and the outcome of subsequent births.  
31 475 *The New England journal of medicine* 1999;340(8):643-4. doi:  
32 476 10.1056/nejm199902253400809 [published Online First: 1999/02/25]  
33 477 28. Wendt A, Gibbs Cassandra M, Peters S, et al. Impact of Increasing Inter-pregnancy  
34 478 Interval on Maternal and Infant Health. *Paediatric and Perinatal Epidemiology*  
35 479 2012;26(s1):239-58. doi: 10.1111/j.1365-3016.2012.01285.x  
36 480 29. Conde-Agudelo A, Belizán JM, Norton MH, et al. Effect of the interpregnancy interval  
37 481 on perinatal outcomes in Latin America. *Obstetrics & Gynecology* 2005;106(2):359-66.  
38 482 30. Stamilio DM, DeFranco E, Paré E, et al. Short interpregnancy interval: risk of uterine  
39 483 rupture and complications of vaginal birth after cesarean delivery. *Obstetrics & Gynecology*  
40 484 2007;110(5):1075-82.  
41 485 31. Zhu BP. Effect of interpregnancy interval on birth outcomes: findings from three recent  
42 486 US studies. *International Journal of Gynecology & Obstetrics* 2005;89:S25-S33. doi:  
43 487 10.1016/j.ijgo.2004.08.002  
44 488 32. Zhu BP, Rolfs RT, Nangle BE, et al. Effect of the interval between pregnancies on  
45 489 perinatal outcomes. *The New England journal of medicine* 1999;340(8):589-94. doi:  
46 490 10.1056/nejm199902253400801 [published Online First: 1999/02/25]  
47 491 33. Saha UR, van Soest A. Infant death clustering in families: Magnitude, causes, and the  
48 492 influence of better health services, Bangladesh 1982–2005. *Population Studies*  
49 493 2011;65(3):273-87. doi: 10.1080/00324728.2011.602100

Table 1: First-day neonatal mortality, early neonatal mortality and small birth size infants by maternal characteristics in Bangladesh: BDHS 1996-2014

| Predictors                                | First-day neonatal mortality<br>(N= 21,382)<br>n (%)<br>n=115 | Early neonatal mortality<br>(N= 21,382)<br>n (%)<br>n=274 | Small birth size<br>(N= 11,022)<br>n (%)<br>n=2,002 |
|-------------------------------------------|---------------------------------------------------------------|-----------------------------------------------------------|-----------------------------------------------------|
| <b>Preceding birth interval in months</b> |                                                               |                                                           |                                                     |
| <36 months                                | 49 (45.2)                                                     | 122 (45.2)                                                | 698 (34.6)                                          |
| 36-59 months                              | 22 (18.8)                                                     | 70 (26.2)                                                 | 610 (31.2)                                          |
| ≥ 60 months                               | 44 (36.0)                                                     | 82 (28.6)                                                 | 694 (34.2)                                          |
| <b>Mother's age at childbirth</b>         |                                                               |                                                           |                                                     |
| ≤19 years                                 | 20 (21.1)                                                     | 40 (16.2)                                                 | 218 (10.7)                                          |
| 20-34 years                               | 82 (67.5)                                                     | 200 (71.5)                                                | 1599 (80.0)                                         |
| ≥35 years                                 | 13 (11.4)                                                     | 34 (12.3)                                                 | 185 (9.3)                                           |
| <b>Birth order</b>                        |                                                               |                                                           |                                                     |
| 2-3                                       | 73 (63.3)                                                     | 163 (60.0)                                                | 1322 (65.8)                                         |
| ≥4                                        | 42 (36.7)                                                     | 111 (40.0)                                                | 680 (34.2)                                          |
| <b>Maternal education</b>                 |                                                               |                                                           |                                                     |
| None                                      | 40 (36.4)                                                     | 116 (42.0)                                                | 751 (38.3)                                          |
| Primary                                   | 41 (33.7)                                                     | 84 (30.6)                                                 | 618 (29.0)                                          |
| Secondary or higher                       | 34 (29.9)                                                     | 74 (27.4)                                                 | 633 (32.7)                                          |
| <b>Wealth index</b>                       |                                                               |                                                           |                                                     |
| Poorest quintile                          | 24 (19.6)                                                     | 71 (23.5)                                                 | 428 (19.6)                                          |
| Second quintile                           | 24 (21.6)                                                     | 63 (24.0)                                                 | 394 (19.8)                                          |
| Middle quintile                           | 24 (19.5)                                                     | 57 (22.2)                                                 | 389 (19.4)                                          |
| Fourth quintile                           | 20 (20.2)                                                     | 35 (13.5)                                                 | 388 (20.7)                                          |
| Richest quintile                          | 23 (19.1)                                                     | 48 (16.8)                                                 | 403 (20.5)                                          |
| <b>Employment status</b>                  |                                                               |                                                           |                                                     |
| Currently working                         | 34 (32.1)                                                     | 70 (28.0)                                                 | 339 (18.0)                                          |
| Not working                               | 81 (67.9)                                                     | 204 (72.0)                                                | 1663 (82.0)                                         |
| <b>Area of residence</b>                  |                                                               |                                                           |                                                     |
| Urban                                     | 35 (20.8)                                                     | 81 (19.0)                                                 | 557 (20.1)                                          |
| Rural                                     | 80 (79.2)                                                     | 193 (81.0)                                                | 1445 (79.9)                                         |
| <b>Maternal BMI</b>                       |                                                               |                                                           |                                                     |
| Underweight                               | 27 (23.1)                                                     | 83 (29.3)                                                 | 711 (35.3)                                          |
| Average                                   | 67 (59.2)                                                     | 156 (58.4)                                                | 1069 (54.5)                                         |
| Overweight                                | 16 (13.1)                                                     | 26 (9.3)                                                  | 169 (7.9)                                           |
| Obese                                     | 5 (4.6)                                                       | 9 (3.0)                                                   | 53 (2.3)                                            |
| <b>Maternal desire of</b>                 |                                                               |                                                           |                                                     |

|                                        |           |            |             |
|----------------------------------------|-----------|------------|-------------|
| pregnancy                              |           |            |             |
| Yes                                    | 77 (63.3) | 171 (63.5) | 1205 (60.1) |
| No                                     | 38 (36.7) | 103 (36.5) | 797 (39.9)  |
| Ever use of contraception              |           |            |             |
| Yes                                    | 81 (72.9) | 196 (71.9) | 1605 (81.1) |
| No                                     | 34 (27.1) | 78 (28.1)  | 397 (18.9)  |
| No. of ANC visits                      |           |            |             |
| None                                   | 48 (43.1) | 146 (55.2) | 998 (51.4)  |
| 1-3 visits                             | 46 (40.7) | 90 (32.0)  | 683 (33.7)  |
| ≥4 visits                              | 21 (16.2) | 38 (12.8)  | 321 (14.9)  |
| ANC by SBA                             |           |            |             |
| Yes                                    | 56 (47.3) | 111 (38.6) | 817 (38.8)  |
| No                                     | 59 (52.7) | 163 (61.4) | 1185 (61.2) |
| History of any previous pregnancy loss |           |            |             |
| Yes                                    | 35 (26.3) | 79 (26.2)  | 435 (21.4)  |
| No                                     | 80 (73.7) | 195 (73.8) | 1567 (78.6) |
| Sex of infant                          |           |            |             |
| Male                                   | 74 (64.1) | 162 (58.0) | 943 (44.9)  |
| Female                                 | 41 (35.9) | 112 (42.0) | 1059 (55.1) |
| Region                                 |           |            |             |
| Barisal                                | 10 (4.2)  | 28 (5.5)   | 176 (4.7)   |
| Chittagong                             | 12 (10.1) | 40 (13.9)  | 463 (25.4)  |
| Khulna                                 | 10 (8.2)  | 27 (9.0)   | 232 (8.6)   |
| Rajshahi                               | 27 (25.1) | 50 (20.9)  | 227 (13.2)  |
| Rangpur                                | 15 (8.0)  | 47 (10.7)  | 235 (8.2)   |
| Sylhet                                 | 10 (3.5)  | 18 (3.5)   | 281 (7.1)   |
| Dhaka                                  | 31 (40.9) | 64 (36.5)  | 388 (32.8)  |
| Year of survey                         |           |            |             |
| 1996                                   | 16 (14.0) | 45 (15.8)  | -           |
| 1999                                   | 13 (10.7) | 45 (15.8)  | 705 (34.2)  |
| 2004                                   | 22 (20.1) | 55 (21.2)  | -           |
| 2007                                   | 19 (17.9) | 37 (13.6)  | -           |
| 2011                                   | 29 (24.1) | 59 (21.5)  | 813 (40.1)  |
| 2014                                   | 16 (13.2) | 33 (12.1)  | 484 (25.7)  |

Table 2: Results of multivariable analysis for the association between preceding birth intervals and adverse pregnancy outcomes in Bangladesh:

BDHS 1996-2014

| Predictors                                | First-day neonatal mortality<br>N=21,382 |         | Early neonatal mortality<br>N=21,382 |         | Small birth size<br>N=11,022 |         |
|-------------------------------------------|------------------------------------------|---------|--------------------------------------|---------|------------------------------|---------|
|                                           | aOR (95% CI)                             | P value | aOR (95% CI)                         | P value | aOR (95% CI)                 | P value |
| <b>Preceding birth interval in months</b> |                                          |         |                                      |         |                              |         |
| <36 months                                | 2.11 (1.17, 3.78)                        | <0.05   | 1.58 (1.13, 2.22)                    | <0.05   | 1.04 (0.90, 1.20)            | 0.08    |
| 36-59 months                              | Reference                                |         | Reference                            |         | Reference                    |         |
| ≥60 months                                | 2.02 (1.10, 3.73)                        |         | 1.23 (0.84, 1.81)                    |         | 1.17 (1.02, 1.34)            |         |
| <b>Mother's age at childbirth</b>         |                                          |         |                                      |         |                              |         |
| ≤19 years                                 | 2.51 (1.35, 4.66)                        | <0.05   | 1.53 (1.02, 2.28)                    | <0.05   | 1.01 (0.83, 1.21)            | 0.68    |
| 20-34 years                               | Reference                                |         | Reference                            |         | Reference                    |         |
| ≥35 years                                 | 1.34 (0.67, 2.69)                        |         | 1.46 (0.93, 2.29)                    |         | 1.10 (0.89, 1.36)            |         |
| <b>Birth order</b>                        |                                          |         |                                      |         |                              |         |
| 2-3                                       | Reference                                |         | Reference                            |         | Reference                    |         |
| ≥4                                        | 1.48 (0.88, 2.50)                        | 0.14    | 1.27 (0.92, 1.75)                    | 0.15    | 1.02 (0.89, 1.16)            | 0.81    |
| <b>Maternal education</b>                 |                                          |         |                                      |         |                              |         |
| None                                      | 0.97 (0.49, 1.94)                        | 0.80    | 0.94 (0.60, 1.46)                    | 0.94    | 1.09 (0.91, 1.30)            | 0.05    |
| Primary                                   | 1.15 (0.62, 2.11)                        |         | 0.98 (0.65, 1.50)                    |         | 0.91 (0.77, 1.07)            |         |
| Secondary or higher                       | Reference                                |         | Reference                            |         | Reference                    |         |
| <b>Wealth status</b>                      |                                          |         |                                      |         |                              |         |
| Poorest quintile                          | 0.76 (0.34, 1.68)                        | 0.89    | 0.86 (0.53, 1.40)                    | 0.68    | 1.30 (1.05, 1.61)            | <0.05   |
| Second quintile                           | 0.92 (0.43, 1.95)                        |         | 0.99 (0.61, 1.63)                    |         | 1.34 (1.09, 1.64)            |         |
| Middle quintile                           | 0.97 (0.48, 1.96)                        |         | 1.09 (0.70, 1.72)                    |         | 1.12 (0.91, 1.37)            |         |
| Fourth quintile                           | 1.15 (0.58, 2.28)                        |         | 0.80 (0.48, 1.32)                    |         | 1.12 (0.93, 1.37)            |         |

|    |                           |                   |       |                   |        |                   |       |
|----|---------------------------|-------------------|-------|-------------------|--------|-------------------|-------|
| 1  |                           |                   |       |                   |        |                   |       |
| 2  |                           |                   |       |                   |        |                   |       |
| 3  |                           |                   |       |                   |        |                   |       |
| 4  |                           |                   |       |                   |        |                   |       |
| 5  | Richest quintile          | Reference         |       | Reference         |        | Reference         |       |
| 6  |                           |                   |       |                   |        |                   |       |
| 7  | Employment status         |                   |       |                   |        |                   |       |
| 8  | Currently working         | 1.59 (0.99, 2.56) | 0.05  | 1.30 (0.96, 1.75) | 0.09   | 1.02 (0.87, 1.19) | 0.83  |
| 9  | Not working               | Reference         |       | Reference         |        | Reference         |       |
| 10 |                           |                   |       |                   |        |                   |       |
| 11 | Area of residence         |                   |       |                   |        |                   |       |
| 12 | Urban                     | 1.10 (0.64, 1.88) | 0.72  | 1.14 (0.80, 1.63) | 0.46   | 1.09 (0.93, 1.27) | 0.28  |
| 13 | Rural                     | Reference         |       | Reference         |        | Reference         |       |
| 14 |                           |                   |       |                   |        |                   |       |
| 15 | Maternal BMI              |                   |       |                   |        |                   |       |
| 16 | Underweight               | 0.58 (0.35, 0.97) | <0.05 | 0.70 (0.52, 0.94) | 0.05   | 1.19 (1.05, 1.34) | <0.05 |
| 17 | Average                   | Reference         |       | Reference         |        | Reference         |       |
| 18 | Overweight                | 1.81 (0.90, 3.65) |       | 1.36 (0.80, 2.32) |        | 0.86 (0.70, 1.07) |       |
| 19 | Obese                     | 1.84 (0.59, 5.67) |       | 1.23 (0.53, 2.89) |        | 0.86 (0.60, 1.23) |       |
| 20 |                           |                   |       |                   |        |                   |       |
| 21 |                           |                   |       |                   |        |                   |       |
| 22 | Maternal desire of        |                   |       |                   |        |                   |       |
| 23 | pregnancy                 |                   |       |                   |        |                   |       |
| 24 | Yes                       | 1.09 (0.71, 1.68) | 0.68  | 1.13 (0.84, 1.51) | 0.43   | 0.92 (0.81, 1.05) | 0.22  |
| 25 | No                        | Reference         |       | Reference         |        | Reference         |       |
| 26 |                           |                   |       |                   |        |                   |       |
| 27 | Ever use of contraception |                   |       |                   |        |                   |       |
| 28 | Yes                       | Reference         |       | Reference         |        | Reference         |       |
| 29 | No                        | 2.20 (1.32, 3.68) | <0.05 | 1.89 (1.35, 2.64) | <0.001 | 1.23 (1.06, 1.42) | <0.05 |
| 30 |                           |                   |       |                   |        |                   |       |
| 31 |                           |                   |       |                   |        |                   |       |
| 32 | No of ANC visits          |                   |       |                   |        |                   |       |
| 33 | None                      | 0.89 (0.29, 2.73) | 0.62  | 1.61 (0.74, 3.48) | 0.48   | 1.09 (0.84, 1.42) | 0.79  |
| 34 | 1-3 visits                | 1.21 (0.61, 2.37) |       | 1.16 (0.71, 1.89) |        | 1.03 (0.86, 1.23) |       |
| 35 | ≥4 visits                 | Reference         |       | Reference         |        | Reference         |       |
| 36 |                           |                   |       |                   |        |                   |       |
| 37 | ANC by SBA                |                   |       |                   |        |                   |       |
| 38 | Yes                       | Reference         |       | Reference         |        | Reference         |       |
| 39 |                           |                   |       |                   |        |                   |       |
| 40 |                           |                   |       |                   |        |                   |       |
| 41 |                           |                   |       |                   |        |                   |       |
| 42 |                           |                   |       |                   |        |                   |       |
| 43 |                           |                   |       |                   |        |                   |       |
| 44 |                           |                   |       |                   |        |                   |       |
| 45 |                           |                   |       |                   |        |                   |       |
| 46 |                           |                   |       |                   |        |                   |       |
| 47 |                           |                   |       |                   |        |                   |       |



|                                        |                   |       |                   |       |                   |        |
|----------------------------------------|-------------------|-------|-------------------|-------|-------------------|--------|
| No                                     | 1.01 (0.46, 2.19) | 0.99  | 0.78 (0.43, 1.42) | 0.42  | 1.05 (0.83, 1.32) | 0.70   |
| History of any previous pregnancy loss |                   |       |                   |       |                   |        |
| Yes                                    | 1.31 (0.85, 2.03) | 0.22  | 1.27 (0.94, 1.71) | 0.12  | 1.04 (0.91, 1.20) | 0.53   |
| No                                     | Reference         |       | Reference         |       | Reference         |        |
| Sex of infant                          |                   |       |                   |       |                   |        |
| Male                                   | 1.70 (1.09, 2.64) | <0.05 | 1.32 (1.01, 1.73) | <0.05 | 0.71 (0.63, 0.80) | <0.001 |
| Female                                 | Reference         |       | Reference         |       | Reference         |        |
| Region                                 |                   |       |                   |       |                   |        |
| Barisal                                | 0.59 (0.27, 1.30) | <0.05 | 0.82 (0.51, 1.30) | <0.05 | 0.74 (0.59, 0.92) | <0.001 |
| Chittagong                             | 0.34 (0.16, 0.71) |       | 0.50 (0.32, 0.77) |       | 1.16 (0.97, 1.38) |        |
| Khulna                                 | 0.72 (0.35, 1.50) |       | 0.91 (0.57, 1.44) |       | 0.96 (0.79, 1.17) |        |
| Rajshahi                               | 1.12 (0.63, 1.99) |       | 1.02 (0.68, 1.53) |       | 0.73 (0.60, 0.89) |        |
| Rangpur                                | 0.68 (0.35, 1.29) |       | 0.99 (0.66, 1.51) |       | 0.81 (0.65, 0.99) |        |
| Sylhet                                 | 0.83 (0.36, 1.88) |       | 0.92 (0.53, 1.61) |       | 1.24 (1.03, 1.50) |        |
| Dhaka                                  | Reference         |       | Reference         |       | Reference         |        |

\*Odds ratios were adjusted for maternal age at childbirth, birth order, maternal education, maternal wealth index, maternal employment status, area of residence, maternal BMI, maternal desire of pregnancy, ever use of contraceptive method, number of ANC visits, ANC by SBA, history of any previous pregnancy loss, sex of infant and region



1  
2  
3  
4  
5  
6  
7  
8  
9  
10  
11  
12  
13  
14  
15  
16  
17  
18  
19  
20  
21  
22  
23  
24  
25  
26  
27  
28  
29  
30  
31  
32  
33  
34  
35  
36  
37  
38  
39  
40  
41  
42  
43  
44  
45  
46  
47

Table 3: Results of multivariable analysis for the association between preceding birth intervals and adverse pregnancy outcomes by history of any previous pregnancy loss: BDHS 1996-2014

| Predictors                                                                | First-day neonatal mortality<br>N=21,382 |         | Early neonatal mortality<br>N=21,382 |         | Small birth size<br>N=11,022 |         |
|---------------------------------------------------------------------------|------------------------------------------|---------|--------------------------------------|---------|------------------------------|---------|
|                                                                           | aOR (95% CI)                             | P value | aOR (95% CI)                         | P value | aOR (95% CI)                 | P value |
| Preceding birth interval in months*history of any previous pregnancy loss |                                          |         |                                      |         |                              |         |
| <36 months                                                                | 2.12 (0.74, 6.13)                        | 0.28    | 1.77 (0.90, 3.49)                    | 0.19    | 0.96 (0.69, 1.33)            | 0.38    |
| 36-59 months                                                              | Reference                                |         | Reference                            |         | Reference                    |         |
| ≥60 months                                                                | 2.15 (0.73, 6.31)                        |         | 1.74 (0.84, 3.62)                    |         | 1.18 (0.87, 1.59)            |         |

\*Odds ratios were adjusted for maternal age at childbirth, birth order, maternal education, maternal wealth index, maternal employment status, area of residence, maternal BMI, maternal desire of pregnancy, ever use of contraceptive method, number of ANC visits, ANC by SBA, sex of infant and region

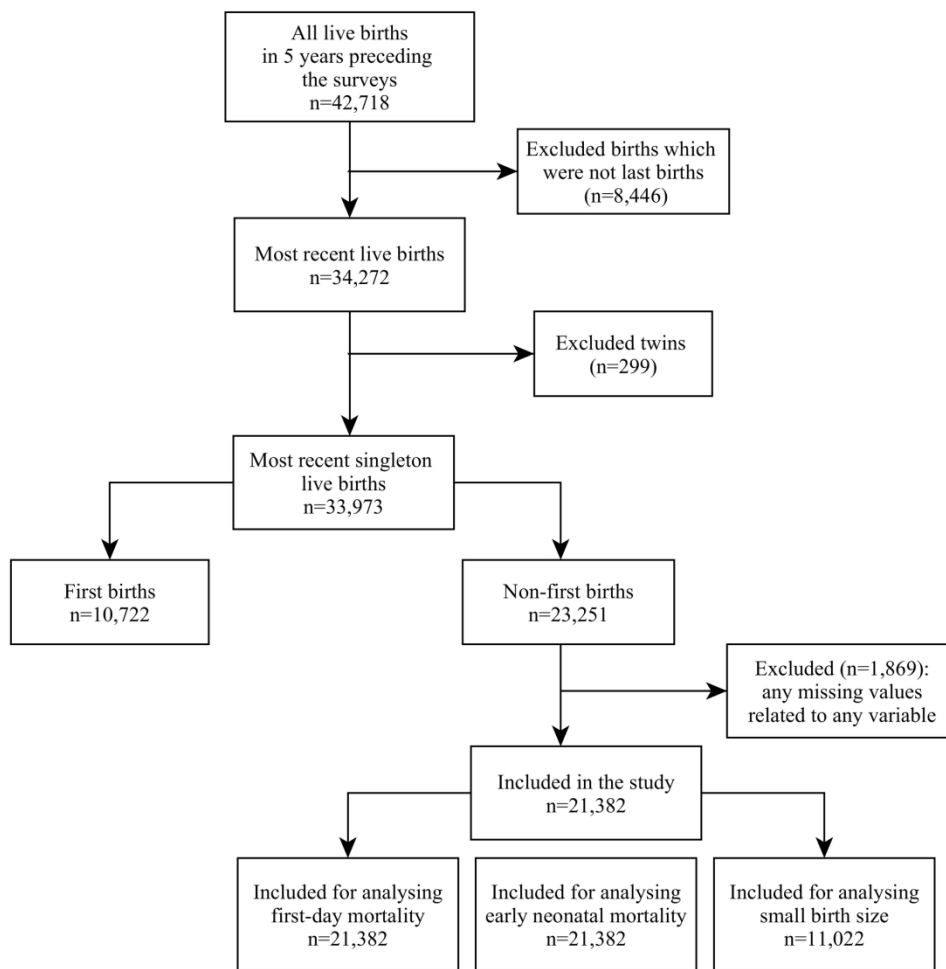

Figure 1: Flow diagram showing sample selection for first-day neonatal mortality, early neonatal mortality and small birth size analysis

203x205mm (300 x 300 DPI)

1  
2  
3  
4  
5  
6  
7  
8  
9  
10  
11  
12  
13  
14  
15  
16  
17  
18  
19  
20  
21  
22  
23  
24  
25  
26  
27  
28  
29  
30  
31  
32  
33  
34  
35  
36  
37  
38  
39  
40  
41  
42  
43  
44  
45  
46  
47  
48  
49  
50  
51  
52  
53  
54  
55  
56  
57  
58  
59  
60

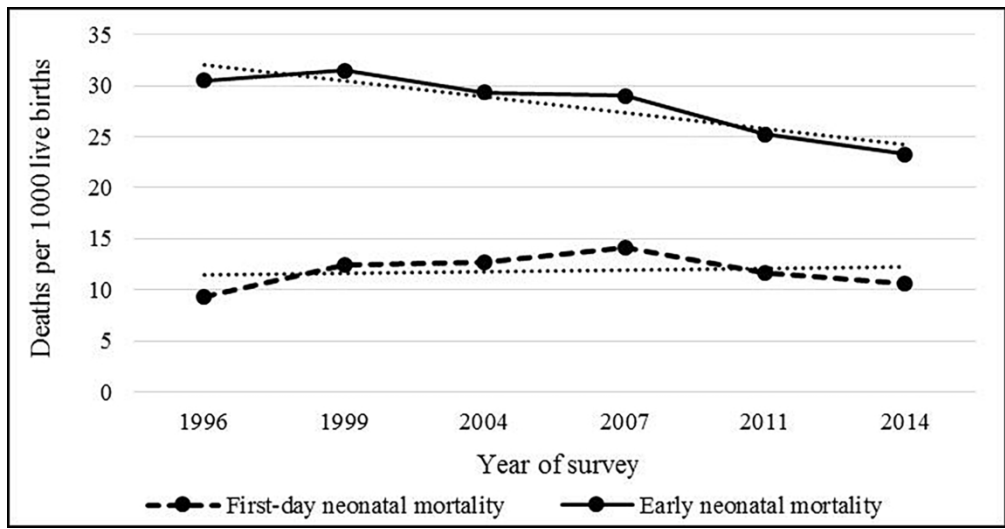

Figure 2: Trends in first-day and early neonatal mortality by year of survey (1996-2014)

191x99mm (300 x 300 DPI)

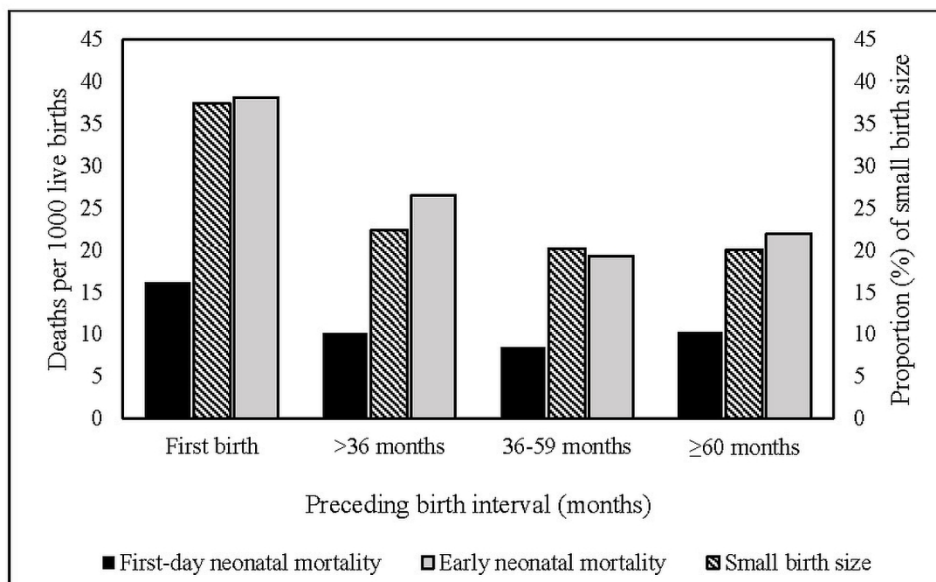

Figure 3: First-day neonatal mortality, early neonatal mortality rates per 1000 live births and the proportion of small birth size by preceding birth intervals

149x101mm (300 x 300 DPI)

STROBE Statement—Checklist of items that should be included in reports of *cross-sectional studies*:  
 Manuscript ID bmjopen-2018-024392

|                           | Item No | Recommendation                                                                                                                                                                       | Reported on page no.             |
|---------------------------|---------|--------------------------------------------------------------------------------------------------------------------------------------------------------------------------------------|----------------------------------|
| <b>Title and abstract</b> | 1       | (a) Indicate the study's design with a commonly used term in the title or the abstract                                                                                               | Page 2, line 31                  |
|                           |         | (b) Provide in the abstract an informative and balanced summary of what was done and what was found                                                                                  | Page 2, line 30-38, 41-49        |
| <b>Introduction</b>       |         |                                                                                                                                                                                      |                                  |
| Background/rationale      | 2       | Explain the scientific background and rationale for the investigation being reported                                                                                                 | Page 4-5, line 71-99             |
| Objectives                | 3       | State specific objectives, including any prespecified hypotheses                                                                                                                     | Page 5, line 99-104              |
| <b>Methods</b>            |         |                                                                                                                                                                                      |                                  |
| Study design              | 4       | Present key elements of study design early in the paper                                                                                                                              | Page 5-6, line 107-124           |
| Setting                   | 5       | Describe the setting, locations, and relevant dates, including periods of recruitment, exposure, follow-up, and data collection                                                      | Page 5-6, line 107-124           |
| Participants              | 6       | (a) Give the eligibility criteria, and the sources and methods of selection of participants                                                                                          | Page 6, line 122-124             |
| Variables                 | 7       | Clearly define all outcomes, exposures, predictors, potential confounders, and effect modifiers. Give diagnostic criteria, if applicable                                             | Page 6-7, line 125-160           |
| Data sources/measurement  | 8*      | For each variable of interest, give sources of data and details of methods of assessment (measurement). Describe comparability of assessment methods if there is more than one group | Page 6, line 125-135             |
| Bias                      | 9       | Describe any efforts to address potential sources of bias                                                                                                                            | Page 6, line 122-124             |
| Study size                | 10      | Explain how the study size was arrived at                                                                                                                                            | Page 5-6, line 107-124, Figure 1 |
| Quantitative variables    | 11      | Explain how quantitative variables were handled in the analyses. If applicable, describe which groupings were chosen and why                                                         | Page 7-8, line 162-186           |
| Statistical methods       | 12      | (a) Describe all statistical methods, including those used to control for confounding                                                                                                | Page 7-8, line 162-187           |
|                           |         | (b) Describe any methods used to examine subgroups and interactions                                                                                                                  | Page 8, line 181-183             |
|                           |         | (c) Explain how missing data were addressed                                                                                                                                          | Figure 1                         |
|                           |         | (d) If applicable, describe analytical methods taking account of sampling strategy                                                                                                   |                                  |
|                           |         | (e) Describe any sensitivity analyses                                                                                                                                                | Page 8, line 181-183             |
| <b>Results</b>            |         |                                                                                                                                                                                      |                                  |
| Participants              | 13*     | (a) Report numbers of individuals at each stage of study—eg numbers potentially eligible, examined for eligibility, confirmed eligible, included in the study, completing            | Figure 1, Page 9, line 197-215   |

|                          |     |                                                                                                                                                                                                              |                                   |
|--------------------------|-----|--------------------------------------------------------------------------------------------------------------------------------------------------------------------------------------------------------------|-----------------------------------|
|                          |     | follow-up, and analysed                                                                                                                                                                                      |                                   |
|                          |     | (b) Give reasons for non-participation at each stage                                                                                                                                                         | Page 9, line 206-212              |
|                          |     | (c) Consider use of a flow diagram                                                                                                                                                                           | Figure 1                          |
| Descriptive data         | 14* | (a) Give characteristics of study participants (eg demographic, clinical, social) and information on exposures and potential confounders                                                                     | Table 1, Page 10-11, line 219-243 |
|                          |     | (b) Indicate number of participants with missing data for each variable of interest                                                                                                                          | Figure 1                          |
| Outcome data             | 15* | Report numbers of outcome events or summary measures                                                                                                                                                         | Table 1                           |
| Main results             | 16  | (a) Give unadjusted estimates and, if applicable, confounder-adjusted estimates and their precision (eg, 95% confidence interval). Make clear which confounders were adjusted for and why they were included | Table 2                           |
|                          |     | (b) Report category boundaries when continuous variables were categorized                                                                                                                                    | Page 7, line 144-146, 150         |
|                          |     | (c) If relevant, consider translating estimates of relative risk into absolute risk for a meaningful time period                                                                                             | N/A                               |
| Other analyses           | 17  | Report other analyses done—eg analyses of subgroups and interactions, and sensitivity analyses                                                                                                               | Table 3                           |
| <b>Discussion</b>        |     |                                                                                                                                                                                                              |                                   |
| Key results              | 18  | Summarise key results with reference to study objectives                                                                                                                                                     | Page 12, line 269-276             |
| Limitations              | 19  | Discuss limitations of the study, taking into account sources of potential bias or imprecision. Discuss both direction and magnitude of any potential bias                                                   | Page 15, line 348-371             |
| Interpretation           | 20  | Give a cautious overall interpretation of results considering objectives, limitations, multiplicity of analyses, results from similar studies, and other relevant evidence                                   | Page 12-15, line 269-341          |
| Generalisability         | 21  | Discuss the generalisability (external validity) of the study results                                                                                                                                        | Page 16, line 373-379             |
| <b>Other information</b> |     |                                                                                                                                                                                                              |                                   |
| Funding                  | 22  | Give the source of funding and the role of the funders for the present study and, if applicable, for the original study on which the present article is based                                                | N/A                               |

# BMJ Open

## Risk of adverse pregnancy outcomes associated with short and long birth intervals in Bangladesh: evidence from six Bangladesh Demographic and Health Surveys, 1996-2014

|                                 |                                                                                                                                                                                                                                                                                                                                                                      |
|---------------------------------|----------------------------------------------------------------------------------------------------------------------------------------------------------------------------------------------------------------------------------------------------------------------------------------------------------------------------------------------------------------------|
| Journal:                        | <i>BMJ Open</i>                                                                                                                                                                                                                                                                                                                                                      |
| Manuscript ID                   | bmjopen-2018-024392.R2                                                                                                                                                                                                                                                                                                                                               |
| Article Type:                   | Research                                                                                                                                                                                                                                                                                                                                                             |
| Date Submitted by the Author:   | 13-Nov-2018                                                                                                                                                                                                                                                                                                                                                          |
| Complete List of Authors:       | Nisha, Monjura; The University of Sydney, Sydney School of Public Health<br>Alam, Ashraful; The University of Sydney, Sydney School of Public Health<br>Islam, Mohammad Tajul; Save the Children Bangladesh<br>Huda, Tanvir ; The University of Sydney, Sydney School of Public Health<br>Raynes-Greenow, Camille; The University of Sydney, School of Public Health |
| <b>Primary Subject Heading</b>: | Public health                                                                                                                                                                                                                                                                                                                                                        |
| Secondary Subject Heading:      | Epidemiology                                                                                                                                                                                                                                                                                                                                                         |
| Keywords:                       | First-day neonatal death, Early neonatal death, Small birth size, Pregnancy outcome, Birth interval, Bangladesh                                                                                                                                                                                                                                                      |
|                                 |                                                                                                                                                                                                                                                                                                                                                                      |

SCHOLARONE™  
Manuscripts

1  
2  
3 1 **Risk of adverse pregnancy outcomes associated with short and long birth intervals in**  
4  
5 2 **Bangladesh: evidence from six Bangladesh Demographic and Health Surveys, 1996-**  
6  
7 3 **2014**  
8  
9

10  
11 4 Monjura Khatun Nisha<sup>1</sup>  
12

13 5 \*Corresponding author  
14

15 6 E-mail: [mnis2091@uni.sydney.edu.au](mailto:mnis2091@uni.sydney.edu.au)  
16  
17

18 7 Ashraful Alam<sup>1</sup>  
19

20 8 Email: [neeloy.alam@sydney.edu.au](mailto:neeloy.alam@sydney.edu.au)  
21  
22

23 9 Mohammad Tajul Islam<sup>2</sup>  
24

25 10 Email: [abc.taj@gmail.com](mailto:abc.taj@gmail.com)  
26  
27

28 11 Tanvir Huda<sup>1</sup>  
29

30 12 Email: [tanvir.huda@sydney.edu.au](mailto:tanvir.huda@sydney.edu.au)  
31  
32

33 13 Camille Raynes-Greenow<sup>1</sup>  
34

35 14 Email: [camille.raynes-greenow@sydney.edu.au](mailto:camille.raynes-greenow@sydney.edu.au)  
36  
37

38 15  
39

40 16  
41

42 17 <sup>1</sup>The University of Sydney, Sydney School of Public Health, Edward Ford Building (A27),  
43

44 18 NSW 2006, Australia  
45

46 19 <sup>2</sup>Save the Children, Dhaka, Bangladesh  
47  
48

49 20  
50

51 21  
52

53 22 Word count: 4078 words (excluding abstract, keywords, strengths and limitations of this study,  
54

55 23 acknowledgement, author's contribution, conflict of interest, funding statement, data sharing  
56

57 24 statement, tables and figures)  
58  
59

60 25



## 26 ABSTRACT

### 27 Objective

28 To examine the effect of short (<36 months) and long ( $\geq 60$  months) birth intervals on adverse  
29 pregnancy outcomes in Bangladesh.

### 30 Design, setting and participants

31 We analysed data from six Bangladesh Demographic and Health Surveys (1996-1997, 1999-  
32 2000, 2004, 2007, 2011 and 2014). We included all singleton non-first live births, most recently  
33 born to mothers within five years preceding each survey (n=21,382). We defined birth interval  
34 according to previous research which suggests that a birth interval between 36 and 59 months  
35 is the most ideal interval. Bivariate and multivariable analyses were conducted to obtain the  
36 crude and adjusted odds ratios (aOR) respectively to assess the odds of first-day neonatal death,  
37 early neonatal death and small birth size for both short (<36 months) and long ( $\geq 60$  months)  
38 spacing between births.

### 39 Main outcome measures

40 First-day neonatal death, early neonatal death and small birth size.

### 41 Results

42 In the multivariable analysis, compared to births spaced 36-59 months, infants with a birth  
43 interval of less than 36 months had increased odds of first-day neonatal death (aOR: 2.11, 95%  
44 CI: 1.17, 3.78) and early neonatal death (aOR: 1.58, 95% CI: 1.13, 2.22). Compared to births  
45 spaced 36-59 months, infants with a birth interval of  $\geq 60$  months, had increased odds of first-  
46 day neonatal death (aOR: 2.02, 95% CI: 1.10, 3.73) and small birth size (aOR: 1.17, 95% CI:  
47 1.02, 1.34). When there was a history of any previous pregnancy loss, there was an increase in  
48 the odds of first-day and early neonatal death for both short and long birth intervals, although  
49 it was not significant.

## 50 **Conclusions**

51 Birth intervals shorter than 36 months and longer than 59 months are associated with increased  
52 odds of adverse pregnancy outcomes. Care-providers, program managers and policymakers  
53 could focus on promoting an optimal birth interval between 36-59 months in postpartum family  
54 planning.

55 **Key words:** Pregnancy outcome, birth interval, first-day neonatal death, early neonatal death,  
56 small birth size, Bangladesh

## 58 **Strengths and limitations of this study**

- 59 • The main strength of this study is the use of a large sample from six nationally  
60 representative surveys of Bangladesh with a very high response (98%).
- 61 • We used data from most recent births within the 5 years preceding the surveys in order  
62 to minimise recall bias.
- 63 • Our study is the first in Bangladesh which analysed the effect of birth intervals and  
64 other risk factors for first-day neonatal mortality.
- 65 • Demographic and Health Survey data is cross-sectional, which reduces the ability to  
66 infer causation.
- 67 • Demographic and Health Survey data uses maternal perceptions of infant birth size as  
68 a proxy for birthweight which may be a limitation.

## 70 **BACKGROUND**

71 Adverse pregnancy outcomes such as stillbirth, early neonatal mortality and low birthweight  
72 are of considerable public health significance. Globally, perinatal mortality (stillbirth and early  
73 neonatal mortality) accounts for more than 6 million deaths every year. Of those deaths,  
74 approximately 2 million occur in the early neonatal period.<sup>1</sup> The risk is greatest on the first day  
75 of life, approximately 1 million newborns die within the first 24 hours.<sup>1</sup> Further, low  
76 birthweight, occurs in more than 20 million newborns worldwide, which is a major contributor  
77 to perinatal mortality and up to 80% of neonatal mortality.<sup>2</sup> The greatest proportion of perinatal  
78 deaths and low birthweight (97-99%) occur in Low and Middle-Income Countries (LMICs).<sup>3</sup>

79 Several interventions have been suggested to address adverse pregnancy outcomes, such as  
80 pregnancy spacing.<sup>4</sup> Both short and long birth intervals have been reported to be associated  
81 with an increased risk of a number of adverse perinatal outcomes.<sup>5 6</sup> Current World Health  
82 Organization (WHO) guidelines recommend an interval of at least 24 months before attempting  
83 the next pregnancy after a live birth (i.e. birth-to-pregnancy interval) in order to reduce any  
84 adverse pregnancy outcomes.<sup>7</sup> Thus, the birth-to-birth interval should be at least 33 months by  
85 including nine months of pregnancy to the recommended 24 months.<sup>8</sup> In an analysis of  
86 Demographic and Health Survey data from 17 developing countries, Rutstein suggested that  
87 the optimal birth interval should be between 36 and 59 months as birth intervals less than 36  
88 and more than 59 months showed a tendency towards neonatal mortality and morbidity.<sup>9</sup> The  
89 WHO highlighted the necessity of future research investigating the association between birth  
90 interval and adverse pregnancy outcomes.<sup>7</sup>

91 Bangladesh has a high perinatal mortality (44 per 1000 pregnancies) and morbidity,<sup>10</sup> where  
92 birth spacing remains a problem.<sup>11</sup> Between the year 1993 and 2014, though the median birth  
93 interval increased by 49% (from 35 months to 52 months), approximately 30% of non-first

1  
2  
3 94 births occurred within less than 36 months (7 months to 35 months) following the previous  
4  
5 95 birth.<sup>10</sup> However, another 40% of non-first births occurred following a birth interval of more  
6  
7 96 than 59 months.<sup>10</sup> Of the papers investigating birth interval in Bangladesh, most have focussed  
8  
9  
10 97 on the effect of a short birth interval and have not considered a long birth interval as a risk of  
11  
12 98 adverse perinatal outcome.<sup>12 13</sup> Given the changing demographics in Bangladesh and an  
13  
14 99 increase in the proportion of longer birth intervals, our objective was to examine whether the  
15  
16  
17 100 preceding birth interval (short or long) was independently associated with an increased risk of  
18  
19 101 adverse pregnancy outcomes including first-day neonatal mortality, early neonatal mortality  
20  
21 102 and low birthweight, using pooled data from the Bangladesh Demographic and Health Surveys  
22  
23  
24 103 (BDHS).

## 27 104 **METHODS**

### 29 105 **Data source**

31  
32 106 We used the BDHS data from the years; 1996-1997, 1999-2000, 2004, 2007, 2011 and 2014.  
33  
34 107 BDHS is a nationally representative household survey carried out every three to four years  
35  
36 108 under the authority of the National Institute of Population Research and Training of the  
37  
38 109 Ministry of Health and Family Welfare. The survey employed a two-stage stratified cluster-  
39  
40 110 sampling design with rural and urban samples to collect information from ever-married women  
41  
42 111 aged 15-49 years and ever-married men 15-54 years about demographic and health status. Data  
43  
44 112 were obtained from the website; [www.measuredhs.com](http://www.measuredhs.com). The BDHS consists of three types of  
45  
46 113 questionnaires: household, women, and men. Our analysis was limited to the information  
47  
48 114 obtained from the women's and household questionnaires. We pooled the data files from six  
49  
50 115 surveys and analysed the live births occurring during the five years preceding the surveys. The  
51  
52 116 Demographic and Health Survey program employs standardised data collection procedures  
53  
54 117 with model questionnaires to ensure consistent content over time and across countries allowing  
55  
56 118 comparability across populations cross-sectionally and over time.<sup>14</sup> We selected six recent

1  
2  
3 119 surveys in this pooled analysis based on the similarities in sampling design, comparability of  
4  
5 120 survey questionnaires for focus variables of this analysis, and availability of data for the pooled  
6  
7  
8 121 analysis. In our analysis, we included the data from all singleton, non-first, most recent live-  
9  
10 122 born children within the five years preceding the six BDHSs, 1996-1997, 1999-2000, 2004,  
11  
12 123 2007, 2011 and 2014.

### 124 **Outcome variables**

125 We conducted three analyses, with three different outcome variables - 'first-day neonatal  
126 death', 'early neonatal death' and 'small birth size'. First-day deaths were defined as deaths  
127 during the first 24 hours after birth (day 0) among live-born children, and early neonatal deaths  
128 were deaths between the age of 0 to 6 days among live-born children. These two outcome  
129 variables overlap, but conform to standard definitions. We used 'small birth size' as a proxy  
130 for low birthweight. Estimates of birthweight are not collected by the BDHS. 'Mother's  
131 perception of the infant's birth size is routinely used as a proxy indicator of birthweight. For  
132 our analysis, we defined 'small birth size' as the birth size of an infant which was perceived as  
133 either 'very small' or 'smaller than average'. Each of the outcome variables was considered  
134 dichotomous for this analysis as yes (1) or no (0).

### 135 **Exposure variable**

136 The main exposure variable used in our analysis was the length of the preceding birth interval  
137 as a measure of birth spacing. This was measured as the number of months between two  
138 successive live births.<sup>9 15</sup> We followed Rutstein's recommendation regarding optimal birth  
139 interval of 36-59 months for our analysis.<sup>9</sup> We categorised the preceding birth interval in  
140 months as short (<36 months) or long ( $\geq 60$  months) birth intervals for our analysis; where the  
141 birth interval of 36-59 months was the reference category.

### 142 **Covariates**

1  
2  
3 143 Covariates included maternal age at childbirth (19 years or below, 20-34 years and 35 years or  
4  
5 144 more), maternal education (none, primary and secondary or higher), birth order (2-3,  $\geq 4$ ),  
6  
7 145 maternal Body Mass Index (BMI) (underweight, average, overweight and obese), area of  
8  
9 146 residence (urban and rural), wealth index (poorest quintile, second quintile, middle quintile,  
10  
11 147 fourth quintile and richest quintile), maternal employment status during survey (currently  
12  
13 148 working and not working), maternal desire of pregnancy (yes and no), ever use of contraception  
14  
15 149 (yes and no), number of Antenatal Care (ANC) visits (none, 1-3 visits and  $\geq 4$  visits), ANC by  
16  
17 150 Skilled Birth Attendants (SBA) (yes and no), history of any previous loss of pregnancy (yes  
18  
19 151 and no), sex of baby (female and male) and region (Dhaka, Barisal, Chittagong, Khulna,  
20  
21 152 Rajshahi, Rangpur and Sylhet).

22  
23  
24  
25  
26  
27 153 We constructed the 'wealth index' variable using principle component analysis through ranking  
28  
29 154 the available wealth variables in the pooled BDHS dataset such as housing materials, type of  
30  
31 155 toilet facility, source of drinking water, type of cooking fuel, availability of electricity,  
32  
33 156 ownership of assets (radio, television, fridge etc.), adjusted for urban-rural differences. We  
34  
35 157 constructed the 'ever use of contraception' variable from calendar data of women's dataset for  
36  
37 158 each year, where 'ever use of contraception' was recorded if there was any contraceptive  
38  
39 159 practice at anytime.

## 160 **Data analysis**

161 The 'first-day neonatal mortality' and 'early neonatal mortality' variables were calculated from  
162 the birth history data, where age at death was recorded in days if they were less than 30 days  
163 old. 'Small birth size' was calculated from the birth history data, based on the perceptions of  
164 mothers about their infant's birth size. Frequencies with weighted percentage were calculated  
165 for the selected variables to describe the characteristics of the women who had a 'first-day  
166 neonatal death', an 'early neonatal death' and a 'small birth size' infant. We conducted  
167 bivariate analysis to ascertain the unadjusted association between each of the independent

1  
2  
3 168 variables and each outcome separately, and multivariable analysis was performed to obtain the  
4  
5 169 adjusted odds ratio (aOR). All covariates associated with the outcomes at  $p \leq 0.25$  in the  
6  
7  
8 170 unadjusted analysis were included in the final multivariable logistic regression model. Further,  
9  
10 171 several other covariates (maternal education, maternal wealth status, maternal area of  
11  
12 172 residence, maternal desire of pregnancy, number of ANC and ANC by SBA) were included in  
13  
14 173 the final model regardless of their significant levels because they are known risk factors of  
15  
16 174 adverse pregnancy outcomes.<sup>9 16 17 18</sup> The 'year of survey' was not included in our final model  
17  
18 175 as the p-value between 'year of survey' and each of the outcome variables was more than 0.25  
19  
20 176 in the unadjusted analysis. However, to test the effect of 'year of survey' we repeated the model  
21  
22 177 and included 'year of survey'. This made no difference to the findings (results not shown), and  
23  
24 178 hence, we kept the original model. We also checked the variables for multicollinearity. The  
25  
26 179 Wald test was used to assess statistical significance with a 95% confidence interval (CI). The  
27  
28 180 association was adjusted for potential confounders including maternal age at childbirth, birth  
29  
30 181 order, maternal education, maternal wealth index, maternal employment status, area of  
31  
32 182 residence, maternal BMI, maternal desire of pregnancy, ever use of contraceptive method,  
33  
34 183 number of ANC visits, ANC by SBA, history of any previous pregnancy loss, sex of infant and  
35  
36 184 region.

37  
38  
39  
40  
41  
42  
43 185 We further restricted our analysis by 'history of any previous pregnancy loss' to assess the  
44  
45 186 combined effect of history of any previous pregnancy loss and birth interval (short or long) on  
46  
47 187 all three outcomes. We followed the direct life table approach to calculate first-day and early  
48  
49 188 neonatal mortality rates per 1000 live births. All analyses were carried out using STATA  
50  
51 189 version 14.2. We used the 'svy' command in all our analyses to calculate the weighted values  
52  
53 190 in order to adjust for the clustering effect and sample stratification.  
54  
55  
56  
57  
58  
59  
60

1  
2  
3 191 We obtained permission from Monitoring and Evaluation to Assess and Use Results  
4  
5 192 Demographic and Health Surveys (MEASURE DHS) to download the data from the DHS  
6  
7  
8 193 online archive. Ethics approval was not required for our analyses, as the data were anonymous  
9  
10 194 and publicly available.

### 13 195 **Patient involvement**

15  
16 196 No patients were involved in this study.

### 19 197 **Figure 1: Flow diagram showing sample selection for first-day neonatal mortality, early** 20 21 22 198 **neonatal mortality and small birth size analysis**

## 25 199 **RESULTS**

27 200 Over the six surveys, and approximately 18 years of data, a total of 42,718 live births were  
28  
29 201 recorded who were born to mothers aged 15-49 years within the five years preceding the  
30  
31 202 surveys with a high response (approximately 98%) (Figure 1). From the years 1996 to 2014,  
32  
33 203 there was a substantial decrease in the rate of overall early neonatal mortality (30.5 vs. 23.3  
34  
35 204 deaths per 1000 live births), but in terms of first-day neonatal mortality, we did not find any  
36  
37 205 consistent decrease, rather the rate has increased from 9.3 deaths in 1996 to 10.6 deaths in 2014  
38  
39 206 per 1000 live births (Figure 2). Rates of all three adverse pregnancy outcomes were highest  
40  
41 207 among the first-born infants followed by the infants whose births were spaced less than 36  
42  
43 208 months (Figure 3).

47 209 There were 33, 973 singleton live-born infants, most recently born to mothers within the five  
48  
49 210 years preceding each survey. Of those, 10,722 (32%) were first-born infants who were  
50  
51 211 ineligible as there was no birth interval, which left 21,382 non-first singleton live-born infants  
52  
53 212 in our final analysis for first-day and early neonatal mortality. For small birth size, our analysis  
54  
55 213 consisted of 11,022 singleton live-born infants only, for the years 1999-2000, 2011 and 2014,  
56  
57  
58  
59  
60



214 as the data regarding birth size were not available for the surveys in 1996-1997, 2004 and 2007  
215 (Figure 1).

216 Of the 21,382 non-first singleton most recently live-born infants of six surveys, there were 115  
217 first-day and 274 early neonatal deaths. Of 11,022 non-first singleton most recently live-born  
218 infants of three surveys, there were 2,002 infants with a birth size smaller than average.

219 **Figure 2: Trends in first-day and early neonatal mortality by year of survey (1996-2014)**

220 **Figure 3: First-day neonatal mortality, early neonatal mortality rates per 1000 live births  
221 and the proportion of small birth size by preceding birth intervals**

#### 222 **First-day neonatal mortality**

223 Nearly half of the infants who died on the first-day (n=49) were born following a short birth  
224 interval, another 44 infants who died on day '0' (36.0%) were born following a long birth  
225 interval. Overall, a greater proportion of mothers of the infants who died on day '0' aged  
226 between 20-34 years (n=82, 67.5%), did not have any formal education (n=40, 36.4%), had a  
227 parity 2-3 (n=73, 63.3%), had an average BMI (n=67, 59.2%) and lived in a rural area (n=80,  
228 79.2%) (Table 1).

#### 229 **Early neonatal mortality**

230 A large proportion of deaths in the early neonatal period were attributable to day '0' deaths  
231 (n=115, 42.8%). Approximately 45% of infants (n=122) who died within 7 days of birth were  
232 born following a short birth interval. Further, a relatively higher proportion (29% vs. 26%) of  
233 early neonatal deaths had a long birth interval compared to the recommended birth interval (36-  
234 59 months). The socio-demographic characteristics of mothers of the infants who died in the  
235 early neonatal period were quite similar to the day '0' findings, and the proportion of early  
236 neonatal mortality was highest among infants born to mothers aged 20-34 years (n=200,  
237 71.5%), had a parity 2-3 (n=163, 60.0%), did not have any formal education (n=116, 42.0%),

238 lived in a rural area (n=193, 81.0%), had an average BMI (n=156, 58.4%) and did not receive  
239 any ANC (n=146, 55.2%) (Table 1).

#### 240 **Small birth size**

241 More than one-third of infants with a small birth size (n=698, 34.6%) were born with a short  
242 birth interval. A similar proportion of infants with a small birth size (n=694, 34.2%) were born  
243 with a long birth interval. The highest proportion of infants with a small birth size were born  
244 to mothers aged 20-34 years (n=1,599, 80.0%), had a parity 2-3 (n=1,322, 65.8%), had no  
245 formal education (n=751, 38.3%), had an average BMI (n=1,069, 54.5%), lived in a rural area  
246 (n=1,445, 79.9%) and did not receive any ANC (n=998, 51.4%) (Table 1).

#### 247 **Association of birth intervals with first-day neonatal mortality**

248 In the multivariable analysis, both short and long birth intervals were associated with increased  
249 odds of first-day neonatal death. Compared to infants born following a birth interval of 36-59  
250 months, infants with a short birth interval were 2.11 times more likely to die within 24 hours  
251 of life (95% CI: 1.17, 3.78). We also found that infants born after a long birth interval,  
252 compared to those born following a birth interval of 36-59 months had 2 times higher odds of  
253 dying within 24 hours of life (95% CI: 1.10, 3.73) (Table 2).

#### 254 **Association of birth intervals with early neonatal mortality**

255 After adjustment for potential confounders, early neonatal mortality was associated with a short  
256 birth interval, while for long birth intervals, no significant association was found. Compared to  
257 infants with a birth interval of 36-59 months, infants born with a short birth interval had 1.58  
258 times higher odds of dying within 7 days of life (95% CI: 1.13, 2.22). Though the odds of early  
259 neonatal mortality were greater for long birth intervals compared to the reference group, there  
260 was no significant association (aOR: 1.23, 95% CI: 0.84, 1.81) (Table 2).

#### 261 **Association of birth intervals with small birth size**

1  
2  
3 262 Long birth intervals appeared to be associated with increased odds of small birth size compared  
4  
5 263 to the reference birth interval (aOR: 1.17, 95% CI: 1.02, 1.34), while for short birth intervals,  
6  
7 264 the odds of small birth size were smaller (aOR: 1.04, 95% CI: 0.90, 1.20) compared to the  
8  
9 265 reference birth interval (Table 2).

10  
11  
12  
13 266 A history of pregnancy loss can be a determinant of birth interval and we therefore restricted  
14  
15 267 our analysis to the infants whose mothers had a history of any previous pregnancy loss for all  
16  
17 268 three outcomes. However, we found no significant relationship for either short or long birth  
18  
19 269 intervals with all three outcomes, though for both short and long birth intervals, there was an  
20  
21 270 increase in the odds for first-day and early neonatal death (Table 3).

## 26 271 **DISCUSSION**

27  
28 272 This study suggests that both short and long birth intervals were associated with adverse  
29  
30 273 pregnancy outcomes. Over the six surveys, a major proportion of infants who died on the first-  
31  
32 274 day, or in the first week or with a small birth size were born before the recommended optimal  
33  
34 275 birth interval (36–59 months). We found that a birth-to-birth interval shorter than 36 months  
35  
36 276 was associated with increased odds of multiple adverse pregnancy outcomes including first-  
37  
38 277 day neonatal mortality and early neonatal mortality. Also, a birth-to-birth interval longer than  
39  
40 278 59 months was associated with increased odds of first-day neonatal mortality and small birth  
41  
42 279 size.

43  
44  
45  
46  
47 280 Infants born with a short birth-to-birth interval of less than 36 months had higher odds of first-  
48  
49 281 day neonatal mortality. Several studies have reported an association of a short birth interval  
50  
51 282 with perinatal or neonatal mortality.<sup>19 20</sup> However, to the best of our knowledge, no prior  
52  
53 283 research has examined the effect of birth interval on first-day neonatal mortality individually.  
54  
55 284 Further, we found that the odds of early neonatal mortality were also greater among infants  
56  
57 285 who were born following a short birth interval. This is consistent with the findings of previous  
58  
59  
60

1  
2  
3 286 investigations from other LMICs which examined the effect of short birth intervals on  
4  
5 287 perinatal, early neonatal or neonatal mortality.<sup>19 20</sup> Similar to our findings, a previous study  
6  
7 288 conducted in India reported an association of neonatal death with a birth interval of less than  
8  
9 289 36 months (aOR: 1.78, 95% CI: 1.63, 1.94), compared to births spaced 36–59 months.<sup>20</sup> Again,  
10  
11 290 an analysis of 47 Demographic Health Surveys also supports our finding of higher odds of  
12  
13 291 early neonatal mortality for short birth intervals, although this analysis has used slightly  
14  
15 292 different definitions of both the short birth interval (<24 months) and the reference category  
16  
17 293 (24–<60 months).<sup>21</sup> Further, our finding is in line with the finding of a previous study conducted  
18  
19 294 in Matlab, Bangladesh, where they reported an increased risk of very short birth intervals (less  
20  
21 295 than 15 months) on early neonatal mortality compared to those born after 36–59 months, though  
22  
23 296 in their study the risk of early neonatal mortality goes down as the birth interval increases up  
24  
25 297 to a minimum of 24–59 months, which is not consistent with our findings.<sup>12</sup> Further, we did not  
26  
27 298 find any significant association between short birth interval and small birth size, although  
28  
29 299 infants born following a short interval were at increased odds of being born with a small birth  
30  
31 300 size. In BDHS, birthweight is not routinely collected and birth size is based on maternal  
32  
33 301 perceptions of infant birth size which could lead to errors in the estimation of small birth size  
34  
35 302 and may be responsible for this non-association. However, the direction of the effect is  
36  
37 303 consistent with several earlier investigations including a meta-analysis of 69 studies from both  
38  
39 304 developing and developed countries.<sup>4 19 22</sup>

40  
41 305 Several hypotheses have been proposed to explain the association between short birth intervals  
42  
43 306 and adverse pregnancy outcomes.<sup>23</sup> One of the most frequently used hypotheses is the maternal  
44  
45 307 nutritional depletion phenomenon, which has been defined by Winkvist et al. as a negative  
46  
47 308 change in maternal nutritional status during a reproductive cycle, mostly due to the biological  
48  
49 309 competition between mother and the growing fetus.<sup>24–26</sup> Short birth spacing does not allow  
50  
51 310 mothers sufficient time to restore nutritional reserves needed to support fetal growth and  
52  
53  
54  
55  
56  
57  
58  
59  
60

1  
2  
3 311 development during the subsequent pregnancy. This eventually causes maternal nutritional  
4  
5 312 depletion that leads to the increase risk of adverse pregnancy outcomes among the births spaced  
6  
7 313 after a short interval. Another explanation is that the association of short birth intervals and  
8  
9 314 adverse pregnancy outcomes could be confounded by other factors including young maternal  
10  
11 315 age, lower socio-economic status and lower utilisation of health services.<sup>27 28</sup> In our analysis,  
12  
13 316 after adjusting for maternal age, socio-economic factors, and maternal characteristics as well  
14  
15 317 as health service related factors, a short birth interval remained associated with first-day and  
16  
17 318 early neonatal mortality which is in line with other studies from both LMICs and high income  
18  
19 319 countries which controlled for similar variables.<sup>12 15 29 30</sup>

20  
21  
22  
23  
24 320 Our study further identified the association of a long birth interval with adverse perinatal  
25  
26 321 outcomes and found that infants born after a long birth interval were at greater odds of first-  
27  
28 322 day neonatal mortality. The effect of long birth intervals on early neonatal mortality was also  
29  
30 323 greater but was not significant. There are only a few published studies on the effect of a long  
31  
32 324 birth interval on adverse pregnancy outcomes in LMICs and the results are conflicting.<sup>4 19 20</sup> In  
33  
34 325 contrast to our findings, a previous investigation conducted in India, examined the effect of a  
35  
36 326 long birth interval for perinatal death and did not find any association,<sup>19</sup> and a pooled analysis  
37  
38 327 of 47 Demographic Health Surveys examined the effect of a longer birth interval for neonatal  
39  
40 328 mortality and found that the odds were lower for the longer preceding birth intervals ( $\geq 60$   
41  
42 329 months) (OR: 0.80, 95% CI: 0.67, 0.95) compared to the birth interval of 24-<60 months.<sup>21</sup>  
43  
44 330 The inconsistency in findings could be attributed to methodological differences in both the  
45  
46 331 reference category (36-59 months vs. 24-<60 months) of the main exposure variable and the  
47  
48 332 difference in the outcome variable (early neonatal mortality vs. neonatal mortality). However,  
49  
50 333 our findings are consistent with a meta-analysis which reported higher odds of early neonatal  
51  
52 334 mortality with a longer interval,<sup>4</sup> and Rutstein's study which analysed data from 17 developing  
53  
54 335 countries.<sup>9</sup> Again, we found that a long birth interval was associated with greater odds of small  
55  
56  
57  
58  
59  
60

1  
2  
3 336 birth size, similar to a few prior studies which also suggested the detrimental effect of a long  
4  
5 337 birth interval on birth size.<sup>4 19 31</sup>  
6  
7

8 338 The increased odds of adverse pregnancy outcomes for long birth intervals may be due to  
9  
10 339 concurrent factors such as advanced maternal age and previous history of pregnancy loss. In  
11  
12 340 an earlier investigation, Zhu et al. explained the association between long birth intervals and  
13  
14 341 adverse pregnancy outcomes through the gradual decline in the maternal physiological and  
15  
16 342 anatomical capacities of the reproductive system, hypothesising that if a woman does not  
17  
18 343 conceive for an extended time after a delivery, her physiological characteristics may return to  
19  
20 344 her unprepared primigravid state.<sup>32</sup> Further research is needed to understand the relationship.  
21  
22  
23  
24

#### 25 345 **Strengths and limitations**

26  
27 346 The main strength of our study is that it was based on a large nationally representative sample  
28  
29 347 from six surveys within an 18-year time period in a single country which would improve the  
30  
31 348 homogeneity of the data. We restricted our analysis to the most recent live births within the  
32  
33 349 five years prior to the interview date to minimise recall bias. Furthermore, we were able to add  
34  
35 350 a number of potential confounding factors.  
36  
37  
38  
39

40 351 We acknowledge some methodological limitations. First, this is cross-sectional data, which  
41  
42 352 may limit the identification of a causal relationship between the birth interval and adverse  
43  
44 353 pregnancy outcomes. Secondly, BDHS data relies on maternal recall and report of the  
45  
46 354 information regarding preceding birth intervals and the days of infant deaths, which are subject  
47  
48 355 to recall bias. Third, there is a possibility of underreporting of infant deaths, as birth histories  
49  
50 356 and infant survival information were only collected from surviving mothers and there is a  
51  
52 357 strong association between maternal and infant deaths. Fourth, we acknowledge a limitation of  
53  
54 358 using maternal perception on infant birth size instead of infant birthweight in our analysis due  
55  
56 359 to unavailability of actual estimates of birthweight in BDHS, which may reflect newborn's  
57  
58  
59  
60

1  
2  
3 360 overall health status rather than birthweight only. Fifth, as we pooled six BDHS datasets over  
4  
5 361 18 years, there may be a possibility of changes in the background characteristics of the  
6  
7 362 population over 18 years. Furthermore, in our analysis, we were unable to include the variable  
8  
9 363 regarding the history of immediate previous adverse outcome such as stillbirth, miscarriage  
10  
11 364 etc. which is a determinant of adverse perinatal outcomes in a subsequent pregnancy. A  
12  
13 365 previous investigation conducted in Bangladesh using dynamic panel data models, reported  
14  
15 366 that a previous adverse birth outcome may be subject to a ‘scarring effect’ which leads to a  
16  
17 367 short birth interval (replacement) and thus increases the risk of mortality of the subsequent  
18  
19 368 infant (nutritional depletion); as a mother with a previous pregnancy loss may rush into a  
20  
21 369 pregnancy without properly recovering from the pregnancy loss.<sup>33</sup> In our analysis, we were  
22  
23 370 unable to consider the role of ‘scarring effect’ related to a previous adverse pregnancy outcome  
24  
25 371 which has an influence on birth interval. To account for this, we were able to stratify our  
26  
27 372 analysis by the variable ‘ever had a pregnancy loss’, although that stratification increased the  
28  
29 373 effect sizes of first-day and early neonatal mortality for both short and long birth intervals,  
30  
31 374 neither were significant.  
32  
33  
34  
35  
36  
37

## 38 375 **CONCLUSIONS**

39  
40 376 Our analysis supports the reduced risk of adverse pregnancy outcomes following a birth-to-  
41  
42 377 birth interval of 36-59 months which is consistent with the WHO recommendation of a birth-  
43  
44 378 to-pregnancy interval of 24 months. Our results highlight several important implications for  
45  
46 379 care-providers, program managers and policymakers by suggesting that a preceding birth  
47  
48 380 interval of 36-59 months could prevent adverse pregnancy outcomes including first-day  
49  
50 381 neonatal death, early neonatal death and low birthweight. Promoting an optimal birth interval  
51  
52 382 of 36-59 months through postpartum family planning may reduce perinatal and neonatal  
53  
54 383 mortality.  
55  
56  
57  
58  
59  
60



1  
2  
3 384 **Acknowledgement**  
4

5 385 This paper is a part of MKN's PhD thesis. We are grateful to Sydney Medical School, The  
6  
7 386 University of Sydney for funding MKN's PhD (Early Career Researcher Postgraduate  
8  
9 387 Scholarship). We would like to thank MEASURE DHS and NIPORT for permitting us to  
10  
11 388 analyse the BDHS 1996-2014 datasets. CRG is funded by the National Health and Medical  
12  
13 389 Research Council Career Development Award #1087062.  
14  
15  
16  
17

18 390 **Authors' contributions**  
19

20 391 MKN, CRG and AA conceptualised and designed the study. MKN performed the literature  
21  
22 392 review. MKN, CRG, MTI and TH performed statistical analysis. MKN and CRG drafted the  
23  
24 393 manuscript. MKN and CRG contributed to the interpretation of the data. MKN, CRG, AA and  
25  
26 394 MTI contributed to the critical revision of the manuscript. All the authors read and approved  
27  
28 395 the final manuscript.  
29  
30  
31  
32

33 396 **Conflict of interest**  
34

35 397 We declare that we have no conflict of interest.  
36  
37

38 398 **Funding Statement**  
39

40 399 This research received no specific grant from any funding agency in the public, commercial or  
41  
42 400 not-for-profit sectors.  
43  
44

45 401 **Data sharing statement**  
46

47 402 The data are anonymous and publicly available in the website; [www.measuredhs.com](http://www.measuredhs.com).  
48  
49  
50  
51  
52  
53  
54  
55  
56  
57  
58  
59  
60



## 403 REFERENCES

- 404 1. World Health Organization. Newborns: reducing mortality 2017 [Available from:  
405 <http://www.who.int/mediacentre/factsheets/fs333/en/> accessed 17 November 2017.
- 406 2. KUO C-P, LEE S-H, WU W-Y, et al. Low Birth Weight: Country, Regional and Global  
407 Estimates Low Birth Weight: Country, Regional and Global Estimates, 2004.
- 408 3. Organization WH. Care of the preterm and low-birth-weight newborn 2017 [Available  
409 from: [http://www.who.int/maternal\\_child\\_adolescent/newborns/prematurity/en/](http://www.who.int/maternal_child_adolescent/newborns/prematurity/en/) accessed 12  
410 December 2017.
- 411 4. Conde-Agudelo A, Rosas-Bermúdez A, Kafury-Goeta A. Birth spacing and risk of adverse  
412 perinatal outcomes: A meta-analysis. *JAMA* 2006;295(15):1809-23. doi:  
413 10.1001/jama.295.15.1809
- 414 5. Ekin A, Gezer C, Taner CE, et al. Impact of interpregnancy interval on the subsequent risk  
415 of adverse perinatal outcomes. *The journal of obstetrics and gynaecology research*  
416 2015;41(11):1744-51. doi: 10.1111/jog.12783 [published Online First: 2015/07/18]
- 417 6. Qin C, Mi C, Xia A, et al. A first look at the effects of long inter-pregnancy interval and  
418 advanced maternal age on perinatal outcomes: A retrospective cohort study. *Birth*  
419 2017;44(3):230-37. doi: 10.1111/birt.12289
- 420 7. World Health Organization. Report of a WHO Technical Consultation on Birth Spacing,  
421 2005.
- 422 8. Exavery A, Mrema S, Shamte A, et al. Levels and correlates of non-adherence to WHO  
423 recommended inter-birth intervals in Rufiji, Tanzania. *BMC Pregnancy and Childbirth*  
424 2012;12(1):152. doi: 10.1186/1471-2393-12-152
- 425 9. Rutstein SO. Effects of preceding birth intervals on neonatal, infant and under-five years  
426 mortality and nutritional status in developing countries: evidence from the demographic and  
427 health surveys. *International Journal of Gynecology & Obstetrics* 2005;89:S7-S24. doi:  
428 10.1016/j.ijgo.2004.11.012
- 429 10. National Institute of Population Research and Training (NIPORT) MaA, and ICF  
430 International. Bangladesh Demographic and Health Survey 2014. Dhaka, Bangladesh, and  
431 Rockville, Maryland, USA: NIPORT, Mitra and Associates, and ICF International, 2016.
- 432 11. Khan JR, Bari W, Latif AHMM. Trend of determinants of birth interval dynamics in  
433 Bangladesh. *BMC Public Health* 2016;16(1):934. doi: 10.1186/s12889-016-3577-9
- 434 12. Davanzo J, Hale L, Razzaque A, et al. The effects of pregnancy spacing on infant and  
435 child mortality in Matlab, Bangladesh: How they vary by the type of pregnancy outcome that  
436 began the interval. *Population Studies* 2008;62(2):131-54. doi: 10.1080/00324720802022089
- 437 13. de Jonge HC, Azad K, Seward N, et al. Determinants and consequences of short birth  
438 interval in rural Bangladesh: a cross-sectional study. *BMC Pregnancy and Childbirth*  
439 2014;14(1):427. doi: 10.1186/s12884-014-0427-6
- 440 14. Corsi DJ, Neuman M, Finlay JE, et al. Demographic and health surveys: a profile.  
441 *International Journal of Epidemiology* 2012;41(6):1602-13. doi: 10.1093/ije/dys184
- 442 15. Rutstein SO. Further evidence of the effects of preceding birth intervals on neonatal,  
443 infant, and under-five-years mortality and nutritional status in developing countries: Evidence  
444 from the demographic and health surveys. DHS Working Papers No 41. Calverton, Maryland,  
445 USA: Macro International, 2008.
- 446 16. Abir T, Agho KE, Page AN, et al. Risk factors for under-5 mortality: evidence from  
447 Bangladesh Demographic and Health Survey, 2004–2011. *BMJ Open* 2015;5(8) doi:  
448 10.1136/bmjopen-2014-006722

- 1  
2  
3 449 17. Ezeh OK. Trends and population-attributable risk estimates for predictors of early  
4 450 neonatal mortality in Nigeria, 2003–2013: a cross-sectional analysis. *BMJ Open* 2017;7(5)  
5 451 doi: 10.1136/bmjopen-2016-013350  
6  
7 452 18. Ghimire PR, Agho KE, Renzaho A, et al. Socio-economic predictors of stillbirths in  
8 453 Nepal (2001-2011). *PLOS ONE* 2017;12(7):e0181332. doi: 10.1371/journal.pone.0181332  
9 454 19. Mahande MJ, Obure J. Effect of interpregnancy interval on adverse pregnancy outcomes  
10 455 in northern Tanzania: a registry-based retrospective cohort study. *BMC Pregnancy and*  
11 456 *Childbirth* 2016;16:140. doi: 10.1186/s12884-016-0929-5  
12 457 20. Williams EK, Hossain MB, Sharma RK, et al. Birth Interval and Risk of Stillbirth or  
13 458 Neonatal Death: Findings from Rural North India. *Journal of Tropical Pediatrics*  
14 459 2008;54(5):321-27. doi: 10.1093/tropej/fmn027  
15 460 21. Kozuki N, Walker N. Exploring the association between short/long preceding birth  
16 461 intervals and child mortality: using reference birth interval children of the same mother as  
17 462 comparison. *BMC Public Health* 2013;13(Suppl 3):S6-S6. doi: 10.1186/1471-2458-13-S3-S6  
18 463 22. Appareddy S, Pryor J, Bailey B. Inter-pregnancy interval and adverse outcomes:  
19 464 Evidence for an additional risk in health disparate populations. *The Journal of Maternal-*  
20 465 *Fetal & Neonatal Medicine* 2017;30(21):2640-44. doi: 10.1080/14767058.2016.1260115  
21 466 23. Miller JE. Birth intervals and perinatal health: an investigation of three hypotheses. *Fam*  
22 467 *Plann Perspect* 1991;23(2):62-70. [published Online First: 1991/03/01]  
23 468 24. Winkvist A, Rasmussen KM, Habicht JP. A new definition of maternal depletion  
24 469 syndrome. *Am J Public Health* 1992;82(5):691-4. [published Online First: 1992/05/01]  
25 470 25. King JC. The risk of maternal nutritional depletion and poor outcomes increases in early  
26 471 or closely spaced pregnancies. *The Journal of nutrition* 2003;133(5 Suppl 2):1732s-36s.  
27 472 [published Online First: 2003/05/06]  
28 473 26. Smits LJ, Essed GG. Short interpregnancy intervals and unfavourable pregnancy  
29 474 outcome: role of folate depletion. *Lancet* 2001;358(9298):2074-7. doi: 10.1016/s0140-  
30 475 6736(01)07105-7 [published Online First: 2002/01/05]  
31 476 27. Klebanoff MA. The interval between pregnancies and the outcome of subsequent births.  
32 477 *The New England journal of medicine* 1999;340(8):643-4. doi:  
33 478 10.1056/nejm199902253400809 [published Online First: 1999/02/25]  
34 479 28. Wendt A, Gibbs Cassandra M, Peters S, et al. Impact of Increasing Inter-pregnancy  
35 480 Interval on Maternal and Infant Health. *Paediatric and Perinatal Epidemiology*  
36 481 2012;26(s1):239-58. doi: 10.1111/j.1365-3016.2012.01285.x  
37 482 29. Conde-Agudelo A, Belizán JM, Norton MH, et al. Effect of the interpregnancy interval  
38 483 on perinatal outcomes in Latin America. *Obstetrics & Gynecology* 2005;106(2):359-66.  
39 484 30. Stamilio DM, DeFranco E, Paré E, et al. Short interpregnancy interval: risk of uterine  
40 485 rupture and complications of vaginal birth after cesarean delivery. *Obstetrics & Gynecology*  
41 486 2007;110(5):1075-82.  
42 487 31. Zhu BP. Effect of interpregnancy interval on birth outcomes: findings from three recent  
43 488 US studies. *International Journal of Gynecology & Obstetrics* 2005;89:S25-S33. doi:  
44 489 10.1016/j.ijgo.2004.08.002  
45 490 32. Zhu BP, Rolfs RT, Nangle BE, et al. Effect of the interval between pregnancies on  
46 491 perinatal outcomes. *The New England journal of medicine* 1999;340(8):589-94. doi:  
47 492 10.1056/nejm199902253400801 [published Online First: 1999/02/25]  
48 493 33. Saha UR, van Soest A. Infant death clustering in families: Magnitude, causes, and the  
49 494 influence of better health services, Bangladesh 1982–2005. *Population Studies*  
50 495 2011;65(3):273-87. doi: 10.1080/00324728.2011.602100  
51  
52  
53  
54  
55  
56  
57  
58 496  
59  
60

Table 1: First-day neonatal mortality, early neonatal mortality and small birth size infants by maternal characteristics in Bangladesh: BDHS 1996-2014

| Predictors                                | First-day neonatal mortality<br>(N= 21,382)<br>n (%)<br>n=115 | Early neonatal mortality<br>(N= 21,382)<br>n (%)<br>n=274 | Small birth size<br>(N= 11,022)<br>n (%)<br>n=2,002 |
|-------------------------------------------|---------------------------------------------------------------|-----------------------------------------------------------|-----------------------------------------------------|
| <b>Preceding birth interval in months</b> |                                                               |                                                           |                                                     |
| <36 months                                | 49 (45.2)                                                     | 122 (45.2)                                                | 698 (34.6)                                          |
| 36-59 months                              | 22 (18.8)                                                     | 70 (26.2)                                                 | 610 (31.2)                                          |
| ≥ 60 months                               | 44 (36.0)                                                     | 82 (28.6)                                                 | 694 (34.2)                                          |
| <b>Mother's age at childbirth</b>         |                                                               |                                                           |                                                     |
| ≤19 years                                 | 20 (21.1)                                                     | 40 (16.2)                                                 | 218 (10.7)                                          |
| 20-34 years                               | 82 (67.5)                                                     | 200 (71.5)                                                | 1599 (80.0)                                         |
| ≥35 years                                 | 13 (11.4)                                                     | 34 (12.3)                                                 | 185 (9.3)                                           |
| <b>Birth order</b>                        |                                                               |                                                           |                                                     |
| 2-3                                       | 73 (63.3)                                                     | 163 (60.0)                                                | 1322 (65.8)                                         |
| ≥4                                        | 42 (36.7)                                                     | 111 (40.0)                                                | 680 (34.2)                                          |
| <b>Maternal education</b>                 |                                                               |                                                           |                                                     |
| None                                      | 40 (36.4)                                                     | 116 (42.0)                                                | 751 (38.3)                                          |
| Primary                                   | 41 (33.7)                                                     | 84 (30.6)                                                 | 618 (29.0)                                          |
| Secondary or higher                       | 34 (29.9)                                                     | 74 (27.4)                                                 | 633 (32.7)                                          |
| <b>Wealth index</b>                       |                                                               |                                                           |                                                     |
| Poorest quintile                          | 24 (19.6)                                                     | 71 (23.5)                                                 | 428 (19.6)                                          |
| Second quintile                           | 24 (21.6)                                                     | 63 (24.0)                                                 | 394 (19.8)                                          |
| Middle quintile                           | 24 (19.5)                                                     | 57 (22.2)                                                 | 389 (19.4)                                          |
| Fourth quintile                           | 20 (20.2)                                                     | 35 (13.5)                                                 | 388 (20.7)                                          |
| Richest quintile                          | 23 (19.1)                                                     | 48 (16.8)                                                 | 403 (20.5)                                          |
| <b>Employment status</b>                  |                                                               |                                                           |                                                     |
| Currently working                         | 34 (32.1)                                                     | 70 (28.0)                                                 | 339 (18.0)                                          |
| Not working                               | 81 (67.9)                                                     | 204 (72.0)                                                | 1663 (82.0)                                         |
| <b>Area of residence</b>                  |                                                               |                                                           |                                                     |
| Urban                                     | 35 (20.8)                                                     | 81 (19.0)                                                 | 557 (20.1)                                          |
| Rural                                     | 80 (79.2)                                                     | 193 (81.0)                                                | 1445 (79.9)                                         |
| <b>Maternal BMI</b>                       |                                                               |                                                           |                                                     |
| Underweight                               | 27 (23.1)                                                     | 83 (29.3)                                                 | 711 (35.3)                                          |
| Average                                   | 67 (59.2)                                                     | 156 (58.4)                                                | 1069 (54.5)                                         |
| Overweight                                | 16 (13.1)                                                     | 26 (9.3)                                                  | 169 (7.9)                                           |
| Obese                                     | 5 (4.6)                                                       | 9 (3.0)                                                   | 53 (2.3)                                            |

|    |                           |           |            |             |
|----|---------------------------|-----------|------------|-------------|
| 1  |                           |           |            |             |
| 2  |                           |           |            |             |
| 3  |                           |           |            |             |
| 4  | Maternal desire of        |           |            |             |
| 5  | pregnancy                 |           |            |             |
| 6  | Yes                       | 77 (63.3) | 171 (63.5) | 1205 (60.1) |
| 7  | No                        | 38 (36.7) | 103 (36.5) | 797 (39.9)  |
| 8  |                           |           |            |             |
| 9  | Ever use of contraception |           |            |             |
| 10 | Yes                       | 81 (72.9) | 196 (71.9) | 1605 (81.1) |
| 11 | No                        | 34 (27.1) | 78 (28.1)  | 397 (18.9)  |
| 12 |                           |           |            |             |
| 13 | No. of ANC visits         |           |            |             |
| 14 | None                      | 48 (43.1) | 146 (55.2) | 998 (51.4)  |
| 15 | 1-3 visits                | 46 (40.7) | 90 (32.0)  | 683 (33.7)  |
| 16 | ≥4 visits                 | 21 (16.2) | 38 (12.8)  | 321 (14.9)  |
| 17 |                           |           |            |             |
| 18 |                           |           |            |             |
| 19 | ANC by SBA                |           |            |             |
| 20 | Yes                       | 56 (47.3) | 111 (38.6) | 817 (38.8)  |
| 21 | No                        | 59 (52.7) | 163 (61.4) | 1185 (61.2) |
| 22 |                           |           |            |             |
| 23 |                           |           |            |             |
| 24 | History of any previous   |           |            |             |
| 25 | pregnancy loss            |           |            |             |
| 26 | Yes                       | 35 (26.3) | 79 (26.2)  | 435 (21.4)  |
| 27 | No                        | 80 (73.7) | 195 (73.8) | 1567 (78.6) |
| 28 |                           |           |            |             |
| 29 |                           |           |            |             |
| 30 | Sex of infant             |           |            |             |
| 31 | Male                      | 74 (64.1) | 162 (58.0) | 943 (44.9)  |
| 32 | Female                    | 41 (35.9) | 112 (42.0) | 1059 (55.1) |
| 33 |                           |           |            |             |
| 34 | Region                    |           |            |             |
| 35 | Barisal                   | 10 (4.2)  | 28 (5.5)   | 176 (4.7)   |
| 36 | Chittagong                | 12 (10.1) | 40 (13.9)  | 463 (25.4)  |
| 37 | Khulna                    | 10 (8.2)  | 27 (9.0)   | 232 (8.6)   |
| 38 | Rajshahi                  | 27 (25.1) | 50 (20.9)  | 227 (13.2)  |
| 39 | Rangpur                   | 15 (8.0)  | 47 (10.7)  | 235 (8.2)   |
| 40 | Sylhet                    | 10 (3.5)  | 18 (3.5)   | 281 (7.1)   |
| 41 | Dhaka                     | 31 (40.9) | 64 (36.5)  | 388 (32.8)  |
| 42 |                           |           |            |             |
| 43 |                           |           |            |             |
| 44 |                           |           |            |             |
| 45 | Year of survey            |           |            |             |
| 46 | 1996                      | 16 (14.0) | 45 (15.8)  | -           |
| 47 | 1999                      | 13 (10.7) | 45 (15.8)  | 705 (34.2)  |
| 48 | 2004                      | 22 (20.1) | 55 (21.2)  | -           |
| 49 | 2007                      | 19 (17.9) | 37 (13.6)  | -           |
| 50 | 2011                      | 29 (24.1) | 59 (21.5)  | 813 (40.1)  |
| 51 | 2014                      | 16 (13.2) | 33 (12.1)  | 484 (25.7)  |
| 52 |                           |           |            |             |
| 53 |                           |           |            |             |
| 54 |                           |           |            |             |
| 55 |                           |           |            |             |
| 56 |                           |           |            |             |
| 57 |                           |           |            |             |
| 58 |                           |           |            |             |
| 59 |                           |           |            |             |
| 60 |                           |           |            |             |

Table 2: Results of multivariable analysis for the association between preceding birth intervals and adverse pregnancy outcomes in Bangladesh:

BDHS 1996-2014

| Predictors                                | First-day neonatal mortality<br>N=21,382 |         | Early neonatal mortality<br>N=21,382 |         | Small birth size<br>N=11,022 |         |
|-------------------------------------------|------------------------------------------|---------|--------------------------------------|---------|------------------------------|---------|
|                                           | aOR (95% CI)                             | p-value | aOR (95% CI)                         | p-value | aOR (95% CI)                 | p-value |
| <b>Preceding birth interval in months</b> |                                          |         |                                      |         |                              |         |
| <36 months                                | 2.11 (1.17, 3.78)                        | <0.05   | 1.58 (1.13, 2.22)                    | <0.05   | 1.04 (0.90, 1.20)            | 0.08    |
| 36-59 months                              | Reference                                |         | Reference                            |         | Reference                    |         |
| ≥60 months                                | 2.02 (1.10, 3.73)                        |         | 1.23 (0.84, 1.81)                    |         | 1.17 (1.02, 1.34)            |         |
| <b>Mother's age at childbirth</b>         |                                          |         |                                      |         |                              |         |
| ≤19 years                                 | 2.51 (1.35, 4.66)                        | <0.05   | 1.53 (1.02, 2.28)                    | <0.05   | 1.01 (0.83, 1.21)            | 0.68    |
| 20-34 years                               | Reference                                |         | Reference                            |         | Reference                    |         |
| ≥35 years                                 | 1.34 (0.67, 2.69)                        |         | 1.46 (0.93, 2.29)                    |         | 1.10 (0.89, 1.36)            |         |
| <b>Birth order</b>                        |                                          |         |                                      |         |                              |         |
| 2-3                                       | Reference                                |         | Reference                            |         | Reference                    |         |
| ≥4                                        | 1.48 (0.88, 2.50)                        | 0.14    | 1.27 (0.92, 1.75)                    | 0.15    | 1.02 (0.89, 1.16)            | 0.81    |
| <b>Maternal education</b>                 |                                          |         |                                      |         |                              |         |
| None                                      | 0.97 (0.49, 1.94)                        | 0.80    | 0.94 (0.60, 1.46)                    | 0.94    | 1.09 (0.91, 1.30)            | 0.05    |
| Primary                                   | 1.15 (0.62, 2.11)                        |         | 0.98 (0.65, 1.50)                    |         | 0.91 (0.77, 1.07)            |         |
| Secondary or higher                       | Reference                                |         | Reference                            |         | Reference                    |         |
| <b>Wealth status</b>                      |                                          |         |                                      |         |                              |         |
| Poorest quintile                          | 0.76 (0.34, 1.68)                        | 0.89    | 0.86 (0.53, 1.40)                    | 0.68    | 1.30 (1.05, 1.61)            | <0.05   |
| Second quintile                           | 0.92 (0.43, 1.95)                        |         | 0.99 (0.61, 1.63)                    |         | 1.34 (1.09, 1.64)            |         |
| Middle quintile                           | 0.97 (0.48, 1.96)                        |         | 1.09 (0.70, 1.72)                    |         | 1.12 (0.91, 1.37)            |         |
| Fourth quintile                           | 1.15 (0.58, 2.28)                        |         | 0.80 (0.48, 1.32)                    |         | 1.12 (0.93, 1.37)            |         |

|    |                              |                   |       |                   |        |                   |       |
|----|------------------------------|-------------------|-------|-------------------|--------|-------------------|-------|
| 1  |                              |                   |       |                   |        |                   |       |
| 2  |                              |                   |       |                   |        |                   |       |
| 3  | Richest quintile             | Reference         |       | Reference         |        | Reference         |       |
| 4  |                              |                   |       |                   |        |                   |       |
| 5  | Employment status            |                   |       |                   |        |                   |       |
| 6  | Currently working            | 1.59 (0.99, 2.56) | 0.05  | 1.30 (0.96, 1.75) | 0.09   | 1.02 (0.87, 1.19) | 0.83  |
| 7  | Not working                  | Reference         |       | Reference         |        | Reference         |       |
| 8  |                              |                   |       |                   |        |                   |       |
| 9  |                              |                   |       |                   |        |                   |       |
| 10 | Area of residence            |                   |       |                   |        |                   |       |
| 11 | Urban                        | 1.10 (0.64, 1.88) | 0.72  | 1.14 (0.80, 1.63) | 0.46   | 1.09 (0.93, 1.27) | 0.28  |
| 12 | Rural                        | Reference         |       | Reference         |        | Reference         |       |
| 13 |                              |                   |       |                   |        |                   |       |
| 14 |                              |                   |       |                   |        |                   |       |
| 15 | Maternal BMI                 |                   |       |                   |        |                   |       |
| 16 | Underweight                  | 0.58 (0.35, 0.97) | <0.05 | 0.70 (0.52, 0.94) | 0.05   | 1.19 (1.05, 1.34) | <0.05 |
| 17 | Average                      | Reference         |       | Reference         |        | Reference         |       |
| 18 | Overweight                   | 1.81 (0.90, 3.65) |       | 1.36 (0.80, 2.32) |        | 0.86 (0.70, 1.07) |       |
| 19 | Obese                        | 1.84 (0.59, 5.67) |       | 1.23 (0.53, 2.89) |        | 0.86 (0.60, 1.23) |       |
| 20 |                              |                   |       |                   |        |                   |       |
| 21 |                              |                   |       |                   |        |                   |       |
| 22 | Maternal desire of pregnancy |                   |       |                   |        |                   |       |
| 23 | Yes                          | 1.09 (0.71, 1.68) | 0.68  | 1.13 (0.84, 1.51) | 0.43   | 0.92 (0.81, 1.05) | 0.22  |
| 24 | No                           | Reference         |       | Reference         |        | Reference         |       |
| 25 |                              |                   |       |                   |        |                   |       |
| 26 |                              |                   |       |                   |        |                   |       |
| 27 | Ever use of contraception    |                   |       |                   |        |                   |       |
| 28 | Yes                          | Reference         |       | Reference         |        | Reference         |       |
| 29 | No                           | 2.20 (1.32, 3.68) | <0.05 | 1.89 (1.35, 2.64) | <0.001 | 1.23 (1.06, 1.42) | <0.05 |
| 30 |                              |                   |       |                   |        |                   |       |
| 31 |                              |                   |       |                   |        |                   |       |
| 32 | No of ANC visits             |                   |       |                   |        |                   |       |
| 33 | None                         | 0.89 (0.29, 2.73) | 0.62  | 1.61 (0.74, 3.48) | 0.48   | 1.09 (0.84, 1.42) | 0.79  |
| 34 | 1-3 visits                   | 1.21 (0.61, 2.37) |       | 1.16 (0.71, 1.89) |        | 1.03 (0.86, 1.23) |       |
| 35 | ≥4 visits                    | Reference         |       | Reference         |        | Reference         |       |
| 36 |                              |                   |       |                   |        |                   |       |
| 37 |                              |                   |       |                   |        |                   |       |
| 38 | ANC by SBA                   |                   |       |                   |        |                   |       |
| 39 | Yes                          | Reference         |       | Reference         |        | Reference         |       |
| 40 |                              |                   |       |                   |        |                   |       |
| 41 |                              |                   |       |                   |        |                   |       |
| 42 |                              |                   |       |                   |        |                   |       |
| 43 |                              |                   |       |                   |        |                   |       |
| 44 |                              |                   |       |                   |        |                   |       |
| 45 |                              |                   |       |                   |        |                   |       |
| 46 |                              |                   |       |                   |        |                   |       |

|                                        |                   |       |                   |       |                   |        |
|----------------------------------------|-------------------|-------|-------------------|-------|-------------------|--------|
| No                                     | 1.01 (0.46, 2.19) | 0.99  | 0.78 (0.43, 1.42) | 0.42  | 1.05 (0.83, 1.32) | 0.70   |
| History of any previous pregnancy loss |                   |       |                   |       |                   |        |
| Yes                                    | 1.31 (0.85, 2.03) | 0.22  | 1.27 (0.94, 1.71) | 0.12  | 1.04 (0.91, 1.20) | 0.53   |
| No                                     | Reference         |       | Reference         |       | Reference         |        |
| Sex of infant                          |                   |       |                   |       |                   |        |
| Male                                   | 1.70 (1.09, 2.64) | <0.05 | 1.32 (1.01, 1.73) | <0.05 | 0.71 (0.63, 0.80) | <0.001 |
| Female                                 | Reference         |       | Reference         |       | Reference         |        |
| Region                                 |                   |       |                   |       |                   |        |
| Barisal                                | 0.59 (0.27, 1.30) | <0.05 | 0.82 (0.51, 1.30) | <0.05 | 0.74 (0.59, 0.92) | <0.001 |
| Chittagong                             | 0.34 (0.16, 0.71) |       | 0.50 (0.32, 0.77) |       | 1.16 (0.97, 1.38) |        |
| Khulna                                 | 0.72 (0.35, 1.50) |       | 0.91 (0.57, 1.44) |       | 0.96 (0.79, 1.17) |        |
| Rajshahi                               | 1.12 (0.63, 1.99) |       | 1.02 (0.68, 1.53) |       | 0.73 (0.60, 0.89) |        |
| Rangpur                                | 0.68 (0.35, 1.29) |       | 0.99 (0.66, 1.51) |       | 0.81 (0.65, 0.99) |        |
| Sylhet                                 | 0.83 (0.36, 1.88) |       | 0.92 (0.53, 1.61) |       | 1.24 (1.03, 1.50) |        |
| Dhaka                                  | Reference         |       | Reference         |       | Reference         |        |

\*Odds ratios were adjusted for maternal age at childbirth, birth order, maternal education, maternal wealth index, maternal employment status, area of residence, maternal BMI, maternal desire of pregnancy, ever use of contraceptive method, number of ANC visits, ANC by SBA, history of any previous pregnancy loss, sex of infant and region



Table 3: Results of multivariable analysis for the association between preceding birth intervals and adverse pregnancy outcomes by history of any previous pregnancy loss: BDHS 1996-2014

| Predictors                                                                | First-day neonatal mortality<br>N=21,382 |         | Early neonatal mortality<br>N=21,382 |         | Small birth size<br>N=11,022 |         |
|---------------------------------------------------------------------------|------------------------------------------|---------|--------------------------------------|---------|------------------------------|---------|
|                                                                           | aOR (95% CI)                             | p-value | aOR (95% CI)                         | p-value | aOR (95% CI)                 | p-value |
| Preceding birth interval in months*history of any previous pregnancy loss |                                          |         |                                      |         |                              |         |
| <36 months                                                                | 2.12 (0.74, 6.13)                        | 0.28    | 1.77 (0.90, 3.49)                    | 0.19    | 0.96 (0.69, 1.33)            | 0.38    |
| 36-59 months                                                              | Reference                                |         | Reference                            |         | Reference                    |         |
| ≥60 months                                                                | 2.15 (0.73, 6.31)                        |         | 1.74 (0.84, 3.62)                    |         | 1.18 (0.87, 1.59)            |         |

\*Odds ratios were adjusted for maternal age at childbirth, birth order, maternal education, maternal wealth index, maternal employment status, area of residence, maternal BMI, maternal desire of pregnancy, ever use of contraceptive method, number of ANC visits, ANC by SBA, sex of infant and region

Peer review only



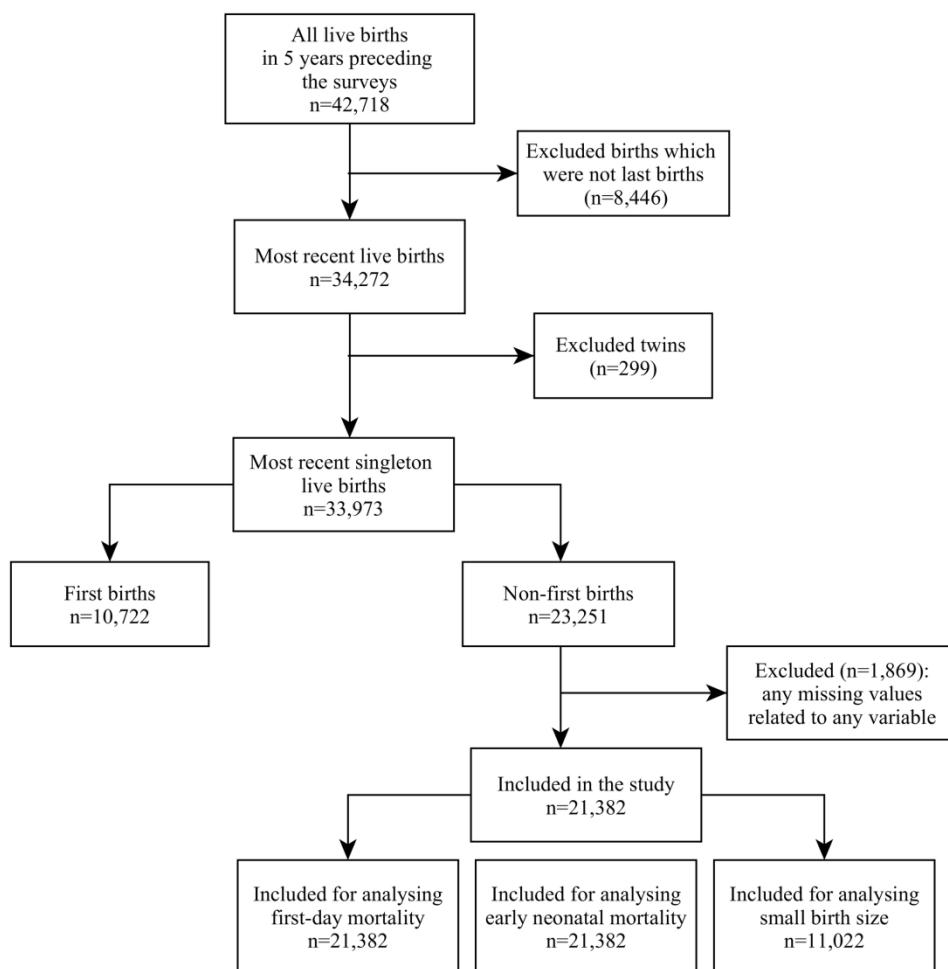

Figure 1: Flow diagram showing sample selection for first-day neonatal mortality, early neonatal mortality and small birth size analysis

203x205mm (300 x 300 DPI)

1  
2  
3  
4  
5  
6  
7  
8  
9  
10  
11  
12  
13  
14  
15  
16  
17  
18  
19  
20  
21  
22  
23  
24  
25  
26  
27  
28  
29  
30  
31  
32  
33  
34  
35  
36  
37  
38  
39  
40  
41  
42  
43  
44  
45  
46  
47  
48  
49  
50  
51  
52  
53  
54  
55  
56  
57  
58  
59  
60



Figure 2: Trends in first-day and early neonatal mortality by year of survey (1996-2014)

191x99mm (300 x 300 DPI)



Figure 3: First-day neonatal mortality, early neonatal mortality rates per 1000 live births and the proportion of small birth size by preceding birth intervals

149x101mm (300 x 300 DPI)

STROBE Statement—Checklist of items that should be included in reports of *cross-sectional studies*:  
 Manuscript ID bmjopen-2018-024392

|                              | Item No | Recommendation                                                                                                                                                                       | Reported on page no.             |
|------------------------------|---------|--------------------------------------------------------------------------------------------------------------------------------------------------------------------------------------|----------------------------------|
| <b>Title and abstract</b>    | 1       | (a) Indicate the study's design with a commonly used term in the title or the abstract                                                                                               | Page 2, line 31                  |
|                              |         | (b) Provide in the abstract an informative and balanced summary of what was done and what was found                                                                                  | Page 2, line 30-38, 41-49        |
| <b>Introduction</b>          |         |                                                                                                                                                                                      |                                  |
| Background/rationale         | 2       | Explain the scientific background and rationale for the investigation being reported                                                                                                 | Page 4-5, line 71-99             |
| Objectives                   | 3       | State specific objectives, including any prespecified hypotheses                                                                                                                     | Page 5, line 99-104              |
| <b>Methods</b>               |         |                                                                                                                                                                                      |                                  |
| Study design                 | 4       | Present key elements of study design early in the paper                                                                                                                              | Page 5-6, line 107-124           |
| Setting                      | 5       | Describe the setting, locations, and relevant dates, including periods of recruitment, exposure, follow-up, and data collection                                                      | Page 5-6, line 107-124           |
| Participants                 | 6       | (a) Give the eligibility criteria, and the sources and methods of selection of participants                                                                                          | Page 6, line 122-124             |
| Variables                    | 7       | Clearly define all outcomes, exposures, predictors, potential confounders, and effect modifiers. Give diagnostic criteria, if applicable                                             | Page 6-7, line 125-160           |
| Data sources/<br>measurement | 8*      | For each variable of interest, give sources of data and details of methods of assessment (measurement). Describe comparability of assessment methods if there is more than one group | Page 6, line 125-135             |
| Bias                         | 9       | Describe any efforts to address potential sources of bias                                                                                                                            | Page 6, line 122-124             |
| Study size                   | 10      | Explain how the study size was arrived at                                                                                                                                            | Page 5-6, line 107-124, Figure 1 |
| Quantitative variables       | 11      | Explain how quantitative variables were handled in the analyses. If applicable, describe which groupings were chosen and why                                                         | Page 7-8, line 162-186           |
| Statistical methods          | 12      | (a) Describe all statistical methods, including those used to control for confounding                                                                                                | Page 7-8, line 162-187           |
|                              |         | (b) Describe any methods used to examine subgroups and interactions                                                                                                                  | Page 8, line 181-183             |
|                              |         | (c) Explain how missing data were addressed                                                                                                                                          | Figure 1                         |
|                              |         | (d) If applicable, describe analytical methods taking account of sampling strategy                                                                                                   |                                  |
|                              |         | (e) Describe any sensitivity analyses                                                                                                                                                | Page 8, line 181-183             |
| <b>Results</b>               |         |                                                                                                                                                                                      |                                  |
| Participants                 | 13*     | (a) Report numbers of individuals at each stage of study—eg numbers potentially eligible, examined for eligibility, confirmed eligible, included in the study, completing            | Figure 1, Page 9, line 197-215   |

|                          |     |                                                                                                                                                                                                              |                                   |
|--------------------------|-----|--------------------------------------------------------------------------------------------------------------------------------------------------------------------------------------------------------------|-----------------------------------|
|                          |     | follow-up, and analysed                                                                                                                                                                                      |                                   |
|                          |     | (b) Give reasons for non-participation at each stage                                                                                                                                                         | Page 9, line 206-212              |
|                          |     | (c) Consider use of a flow diagram                                                                                                                                                                           | Figure 1                          |
| Descriptive data         | 14* | (a) Give characteristics of study participants (eg demographic, clinical, social) and information on exposures and potential confounders                                                                     | Table 1, Page 10-11, line 219-243 |
|                          |     | (b) Indicate number of participants with missing data for each variable of interest                                                                                                                          | Figure 1                          |
| Outcome data             | 15* | Report numbers of outcome events or summary measures                                                                                                                                                         | Table 1                           |
| Main results             | 16  | (a) Give unadjusted estimates and, if applicable, confounder-adjusted estimates and their precision (eg, 95% confidence interval). Make clear which confounders were adjusted for and why they were included | Table 2                           |
|                          |     | (b) Report category boundaries when continuous variables were categorized                                                                                                                                    | Page 7, line 144-146, 150         |
|                          |     | (c) If relevant, consider translating estimates of relative risk into absolute risk for a meaningful time period                                                                                             | N/A                               |
| Other analyses           | 17  | Report other analyses done—eg analyses of subgroups and interactions, and sensitivity analyses                                                                                                               | Table 3                           |
| <b>Discussion</b>        |     |                                                                                                                                                                                                              |                                   |
| Key results              | 18  | Summarise key results with reference to study objectives                                                                                                                                                     | Page 12, line 269-276             |
| Limitations              | 19  | Discuss limitations of the study, taking into account sources of potential bias or imprecision. Discuss both direction and magnitude of any potential bias                                                   | Page 15, line 348-371             |
| Interpretation           | 20  | Give a cautious overall interpretation of results considering objectives, limitations, multiplicity of analyses, results from similar studies, and other relevant evidence                                   | Page 12-15, line 269-341          |
| Generalisability         | 21  | Discuss the generalisability (external validity) of the study results                                                                                                                                        | Page 16, line 373-379             |
| <b>Other information</b> |     |                                                                                                                                                                                                              |                                   |
| Funding                  | 22  | Give the source of funding and the role of the funders for the present study and, if applicable, for the original study on which the present article is based                                                | N/A                               |
